# Supplementary material for: Semi-synthesis, α-amylase inhibition, and kinetic and molecular docking studies of arylidene-based sesquiterpene coumarins isolated from Ferula tunetana Pomel ex Batt
Source: Royal Society of Chemistry journal article supplement (doi:10.1039/d3ra07540k), 2024-01-01
Supplement: d3ra07540k1.pdf [file d3ra07540k1.pdf]

**Semi-synthesis,  $\alpha$ -amylase inhibition, kinetic and molecular docking studies of arylidenes-based sesquiterpene coumarin isolated from *Ferula tunetana* POMEL ex BATT.**

Wiem Baccari,<sup>a</sup> Ilyes Saidi,<sup>a</sup> Insaf Filali,<sup>\*b</sup> Mansour Znati,<sup>a</sup> Houda Lazrag,<sup>c</sup> Moncef Tounsi,<sup>d</sup> Axel Marchal,<sup>ef</sup> Pierre Waffo-Teguo,<sup>ef</sup> and Hichem Ben Jannet<sup>\*a</sup>

## Table of Contents

**S1: ROESY NMR spectrum of compound 3f**

**S2: <sup>1</sup>H, COSY, HSQC, HMBC, ROESY NMR and ESI-HRMS spectra of compounds 1, 2 and 3a-m**

**S3: Active site docking/blind docking poses of compounds 1, 3a-m**

**S4: Toxicity risk prediction for compounds 1 and 3a-m**

**S5: Kinetic study of the three most active compounds**

**S6: IC<sub>50</sub> graphs of all the tested compounds**

❖ S1: ROESY NMR spectrum of compound 3f

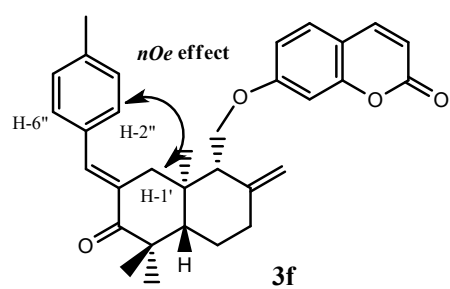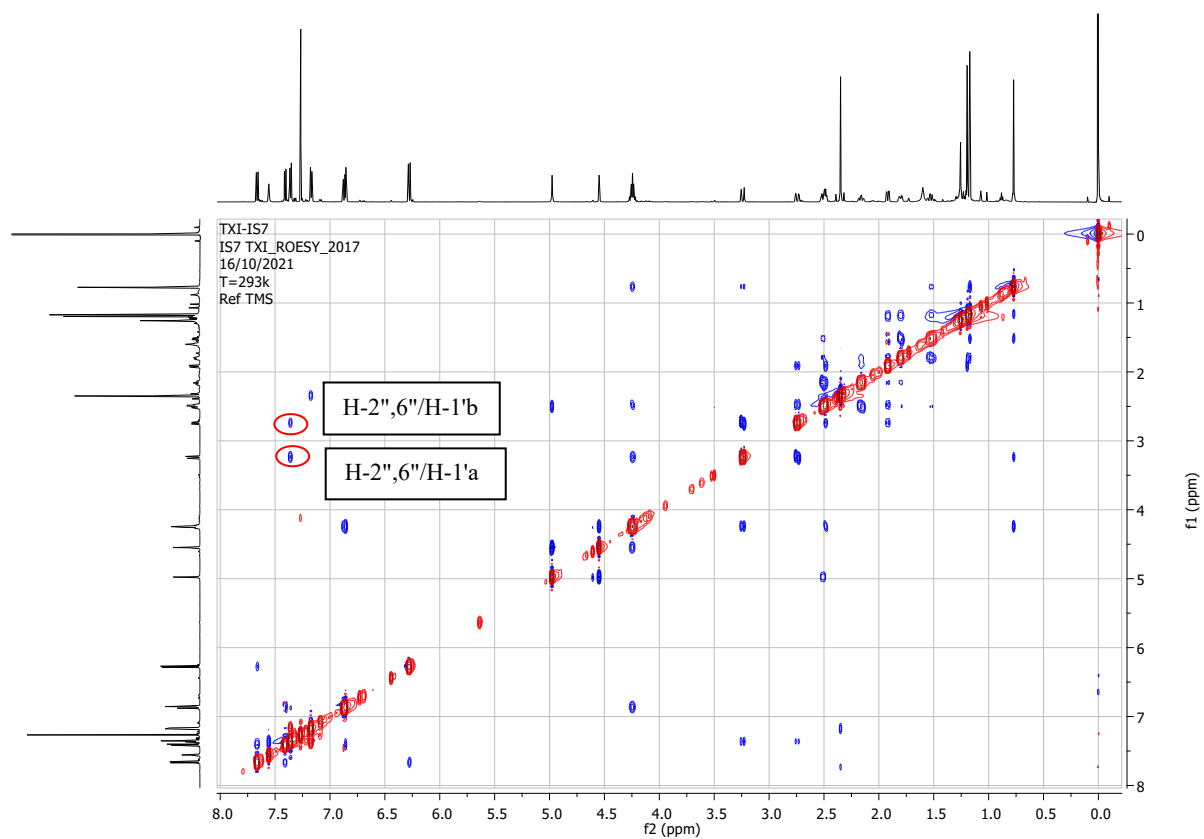

ROSY NMR spectrum of compound 3f

❖ S2: <sup>1</sup>H, HSQC and HMBC NMR spectra of compounds 1, 2 and 3a-m

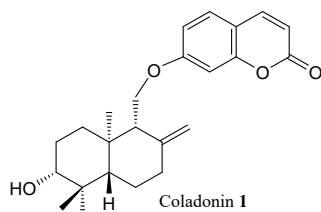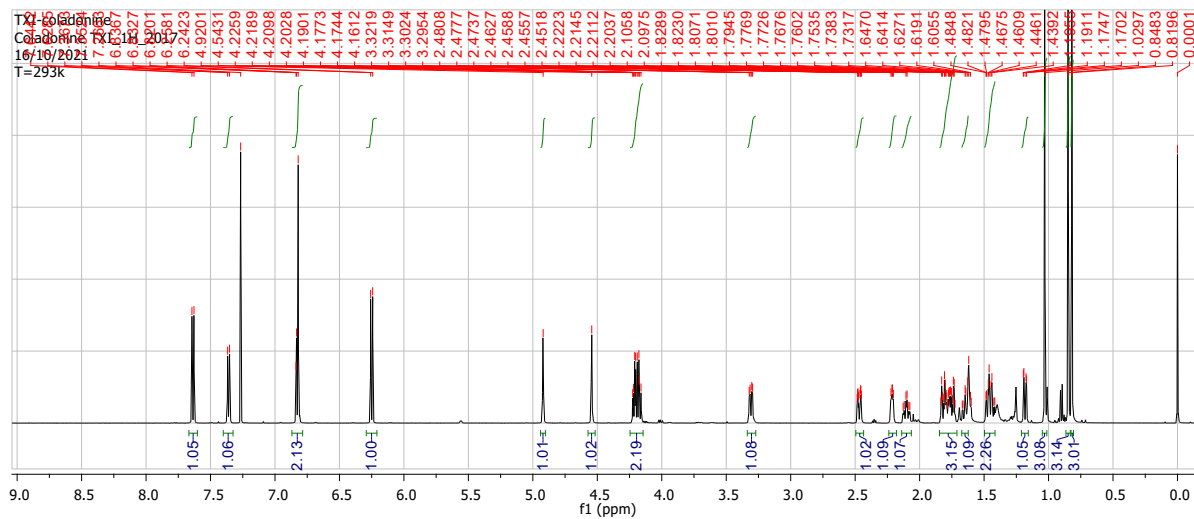

<sup>1</sup>H NMR spectrum (600 MHz, CDCl<sub>3</sub>) of compound 1

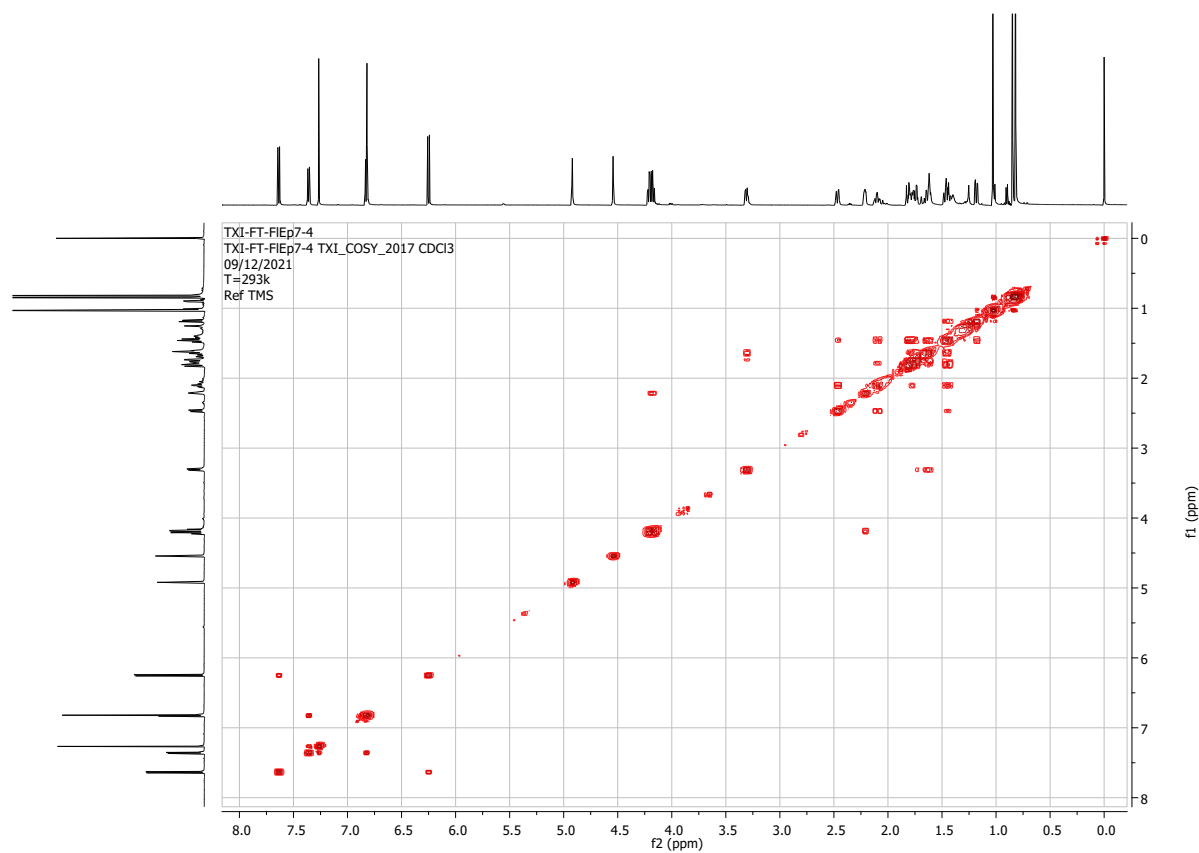

COSY spectrum of compound 1

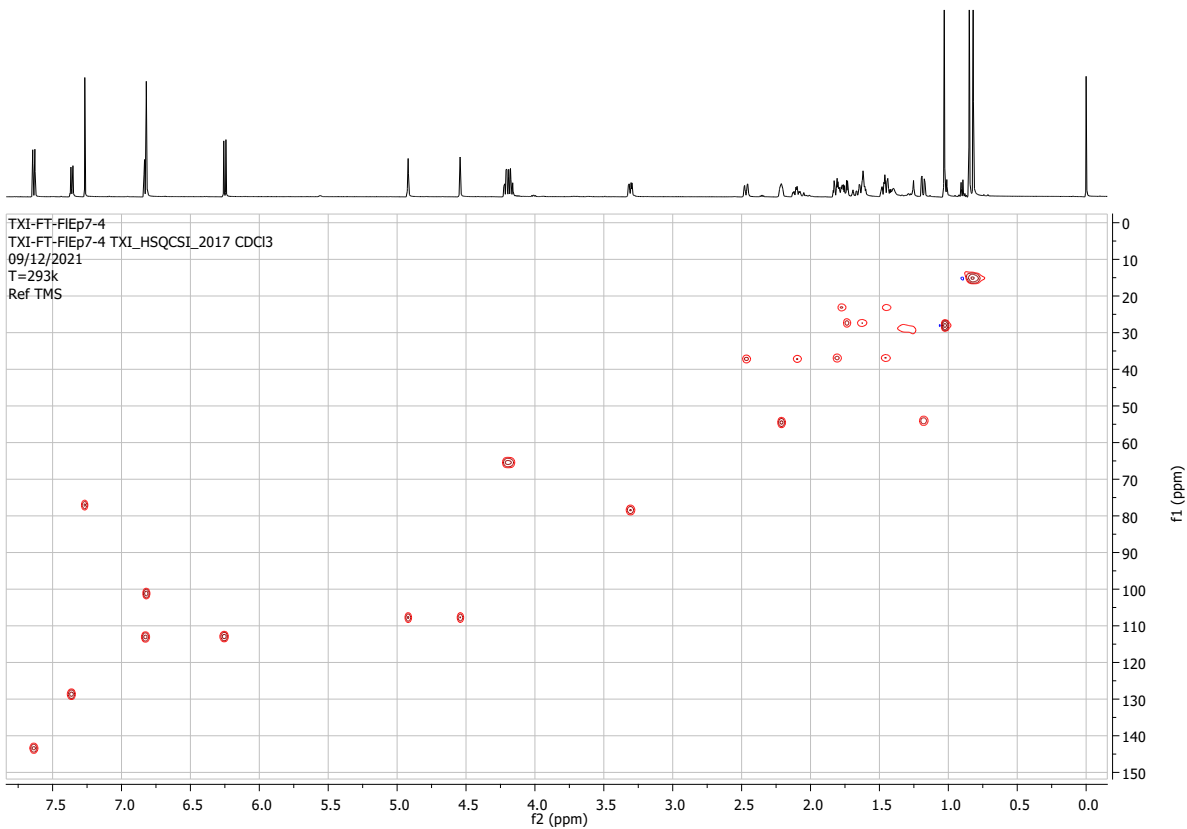

**HSQC spectrum of compound 1**

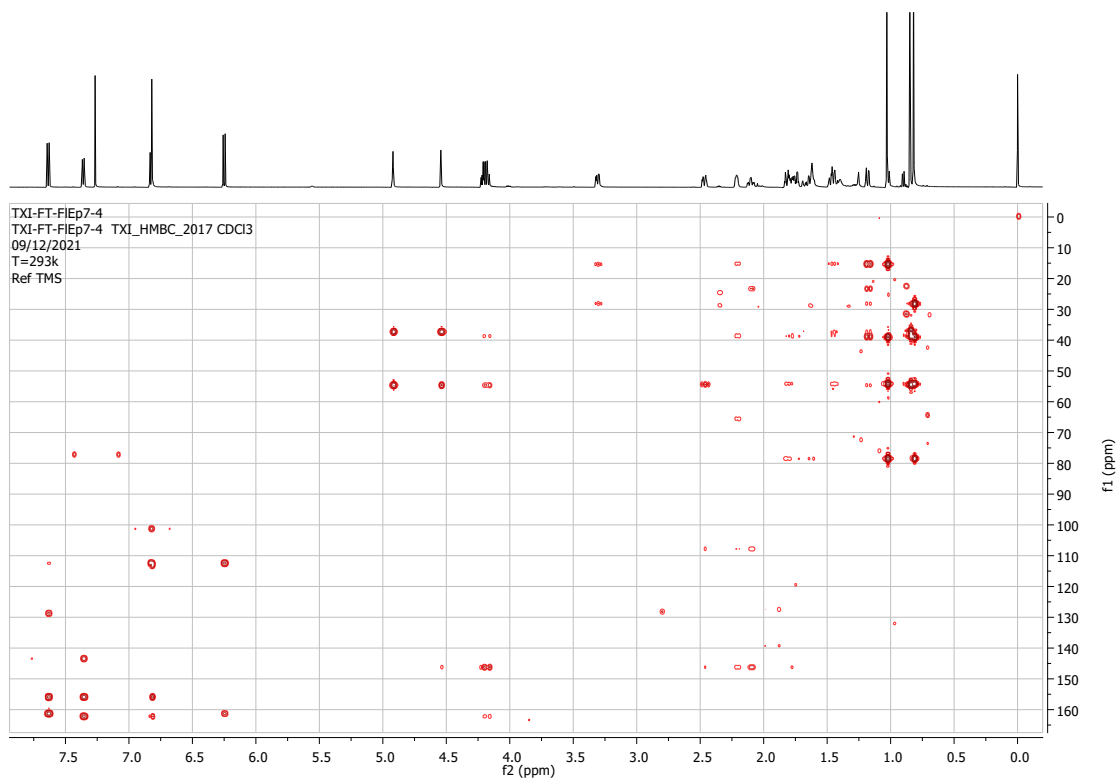

**HMBC spectrum of compound 1**



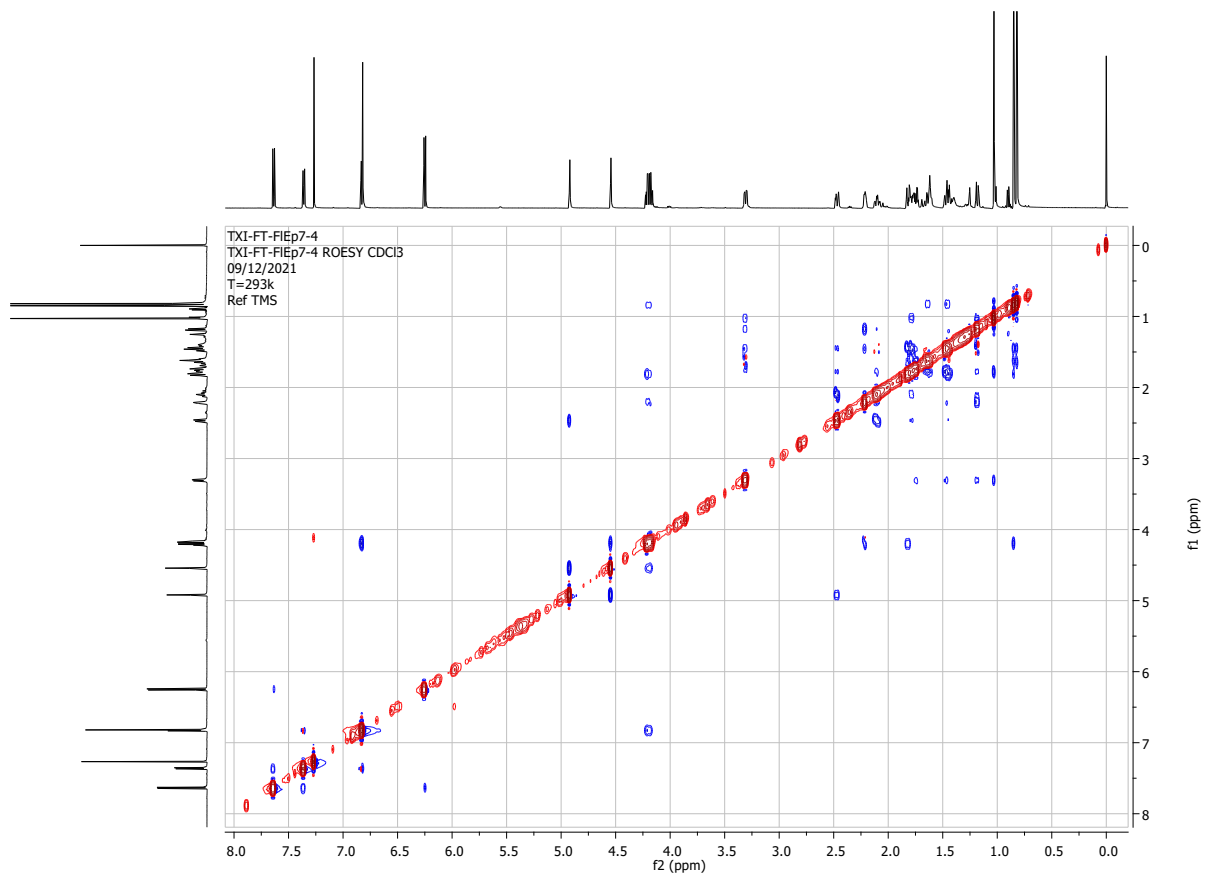

ROESY spectrum of compound 1

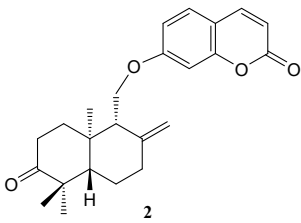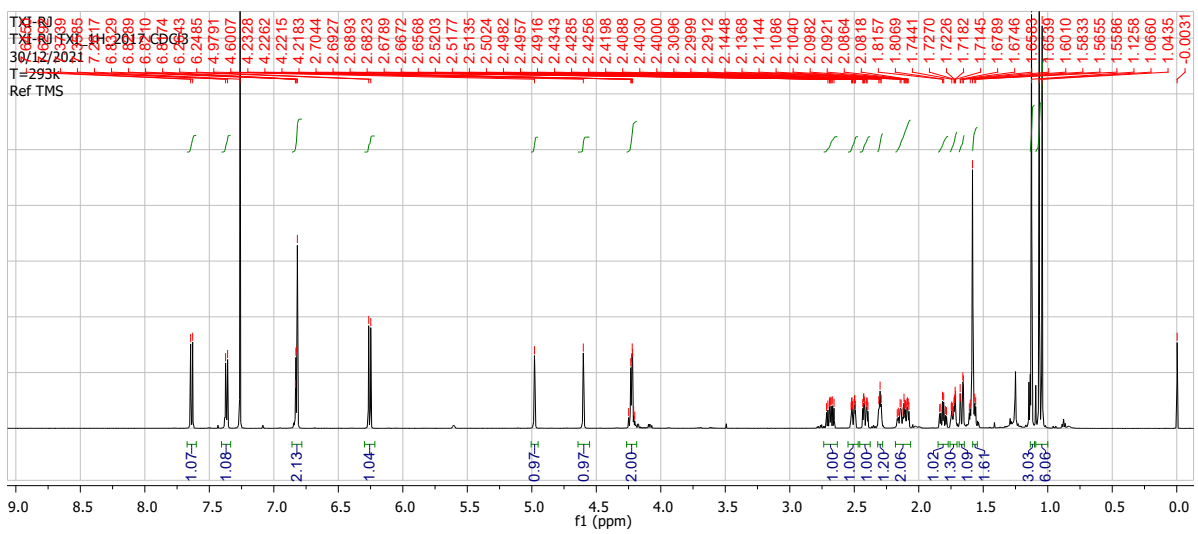

### <sup>1</sup>H NMR spectrum (600 MHz, CDCl<sub>3</sub>) of compound 2

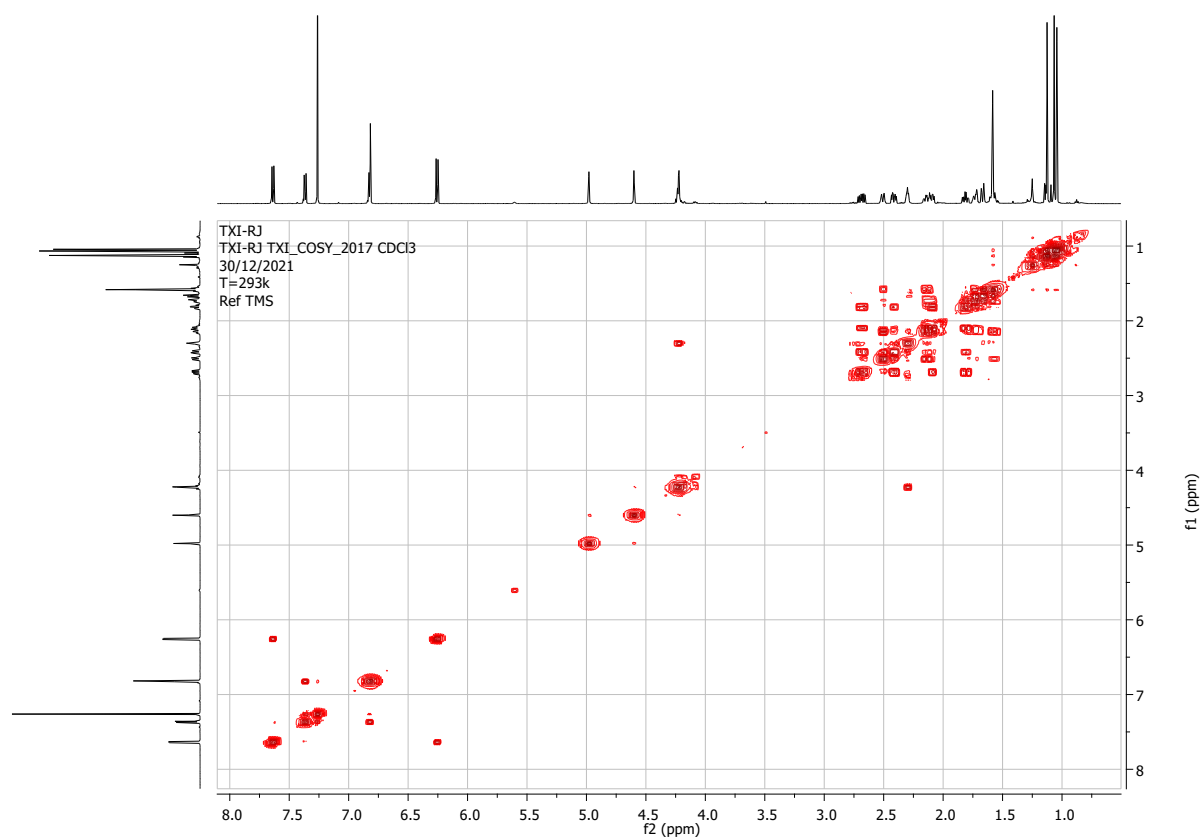

### COSY spectrum of compound 2

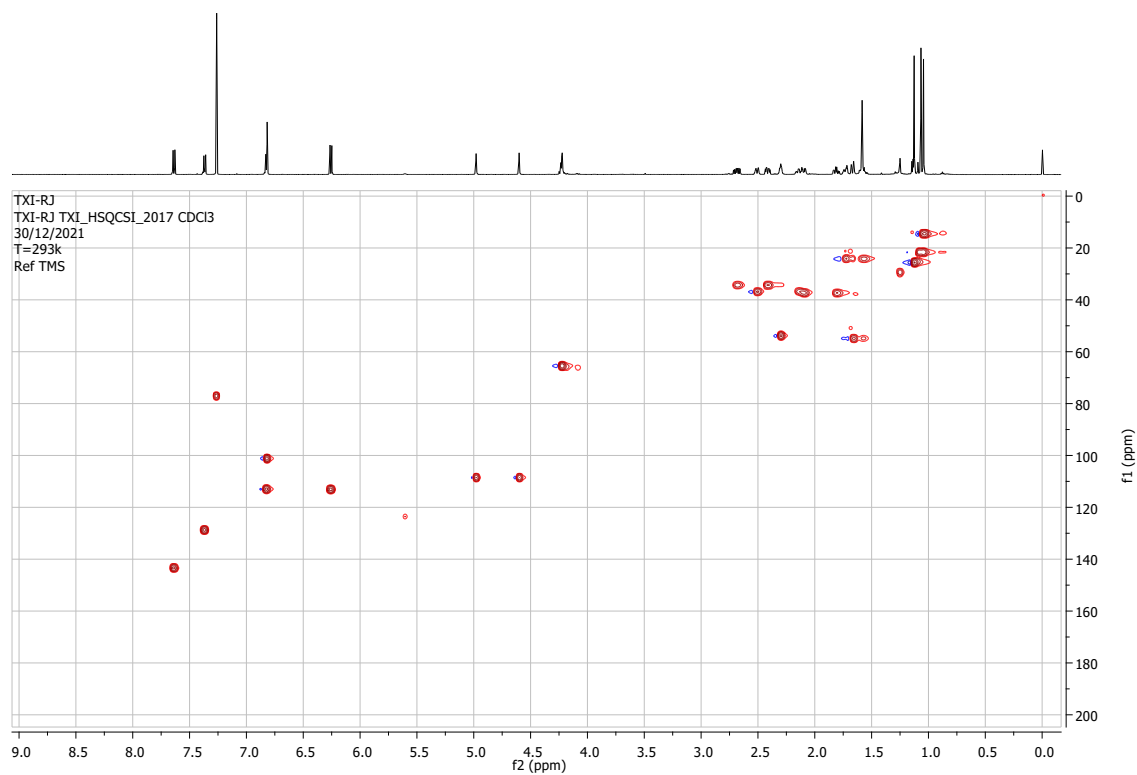

### HSQC spectrum of compound 2

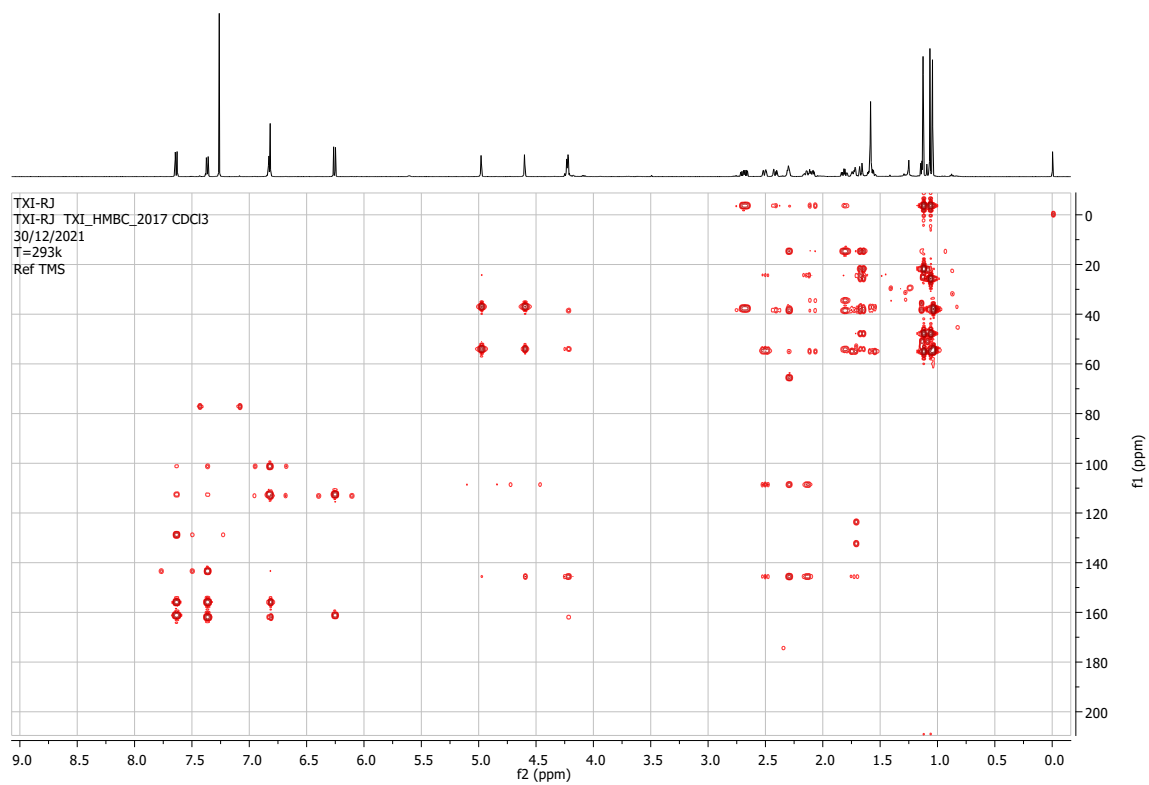

### HMBC spectrum of compound 2

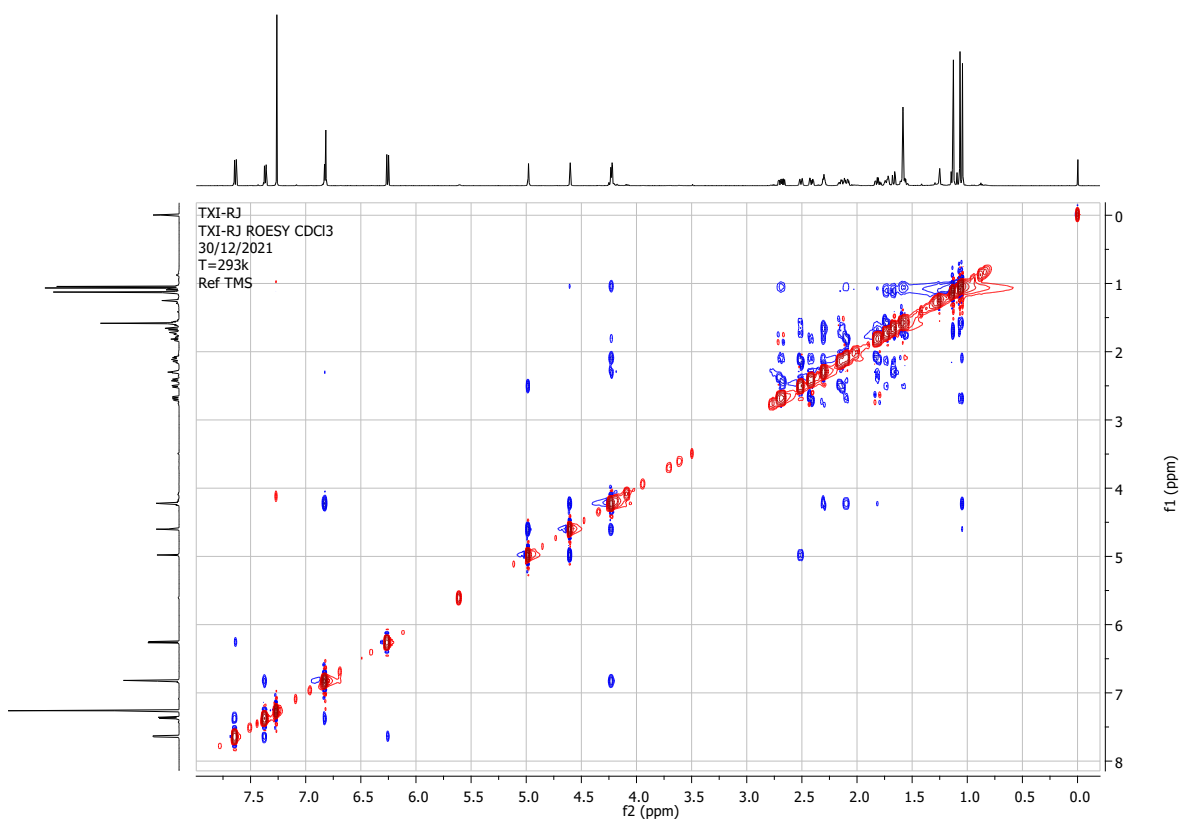

## ROESY spectrum of compound 2

RJ #34 RT: 0.25 AV: 1 SM: 7G NL: 2.14E7  
T: FTMS + p ESI Full ms [120.00-2000.00]

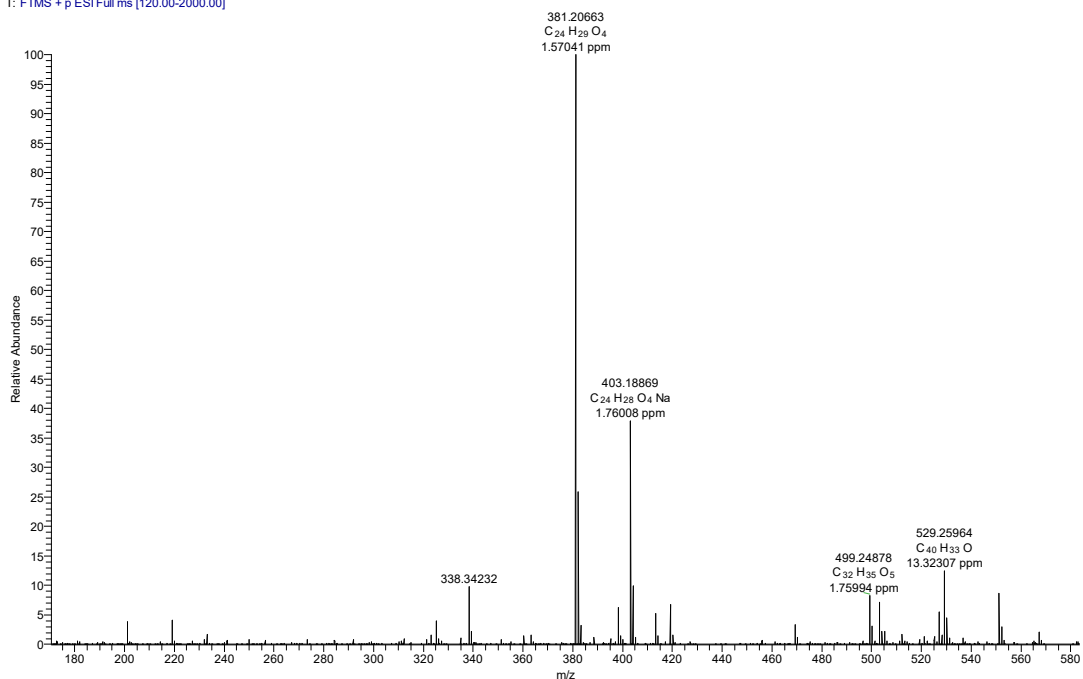

## ESI-HRMS spectrum of compound 2

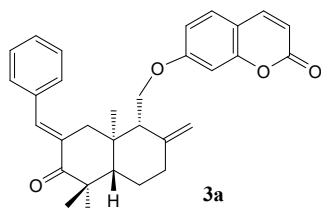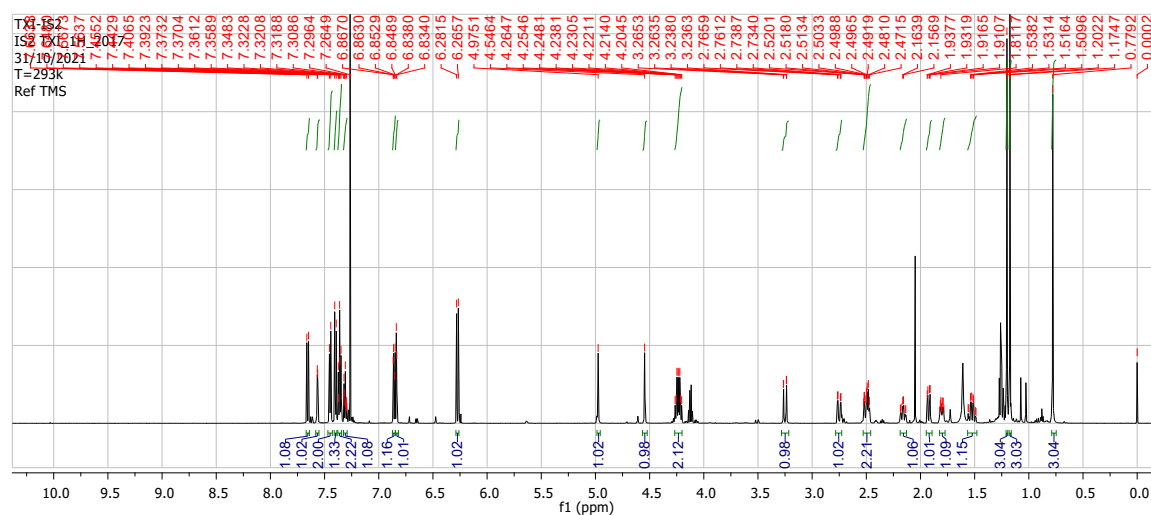

<sup>1</sup>H NMR spectrum (600 MHz, CDCl<sub>3</sub>) of compound 3a

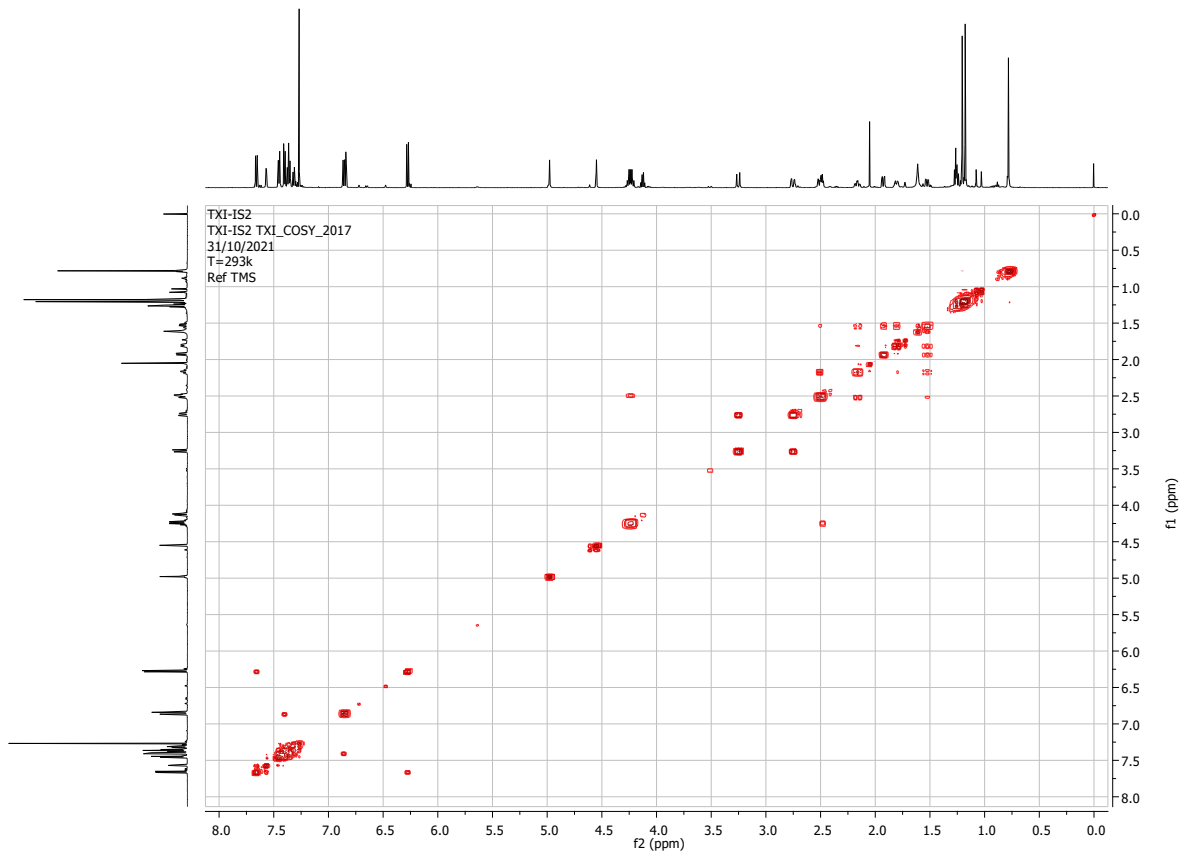

**COSY spectrum of compound 3a**

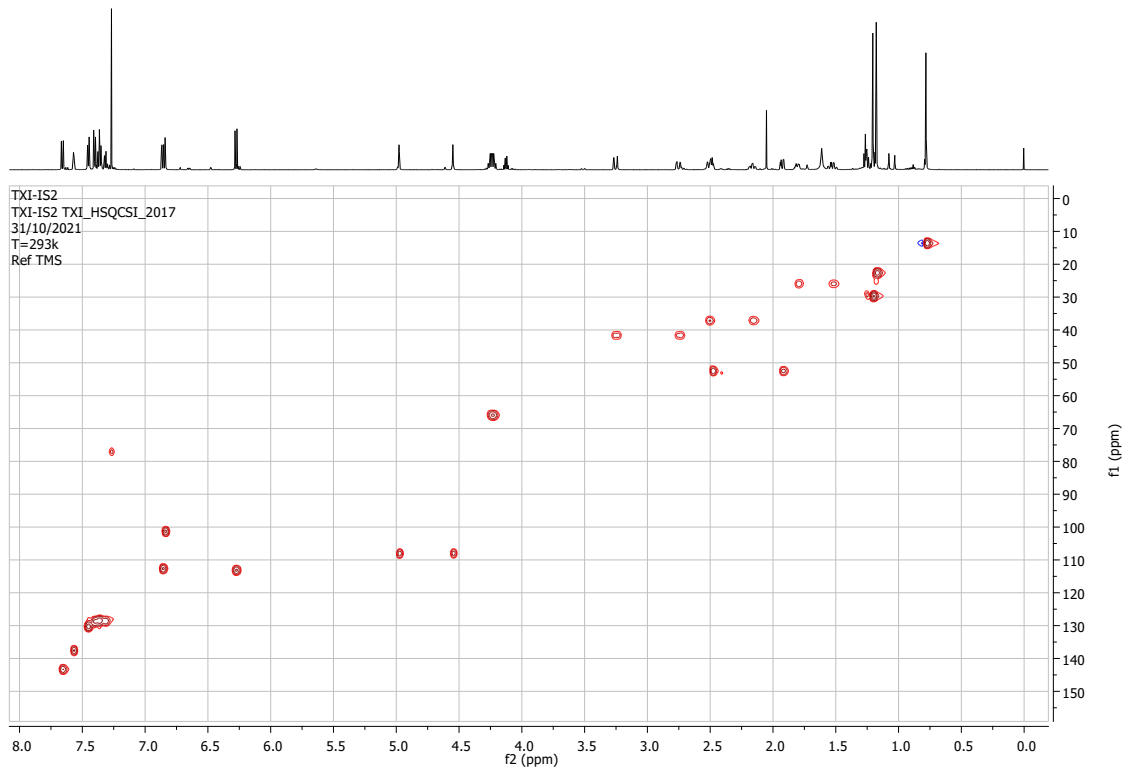

### HSQC spectrum of compound 3a

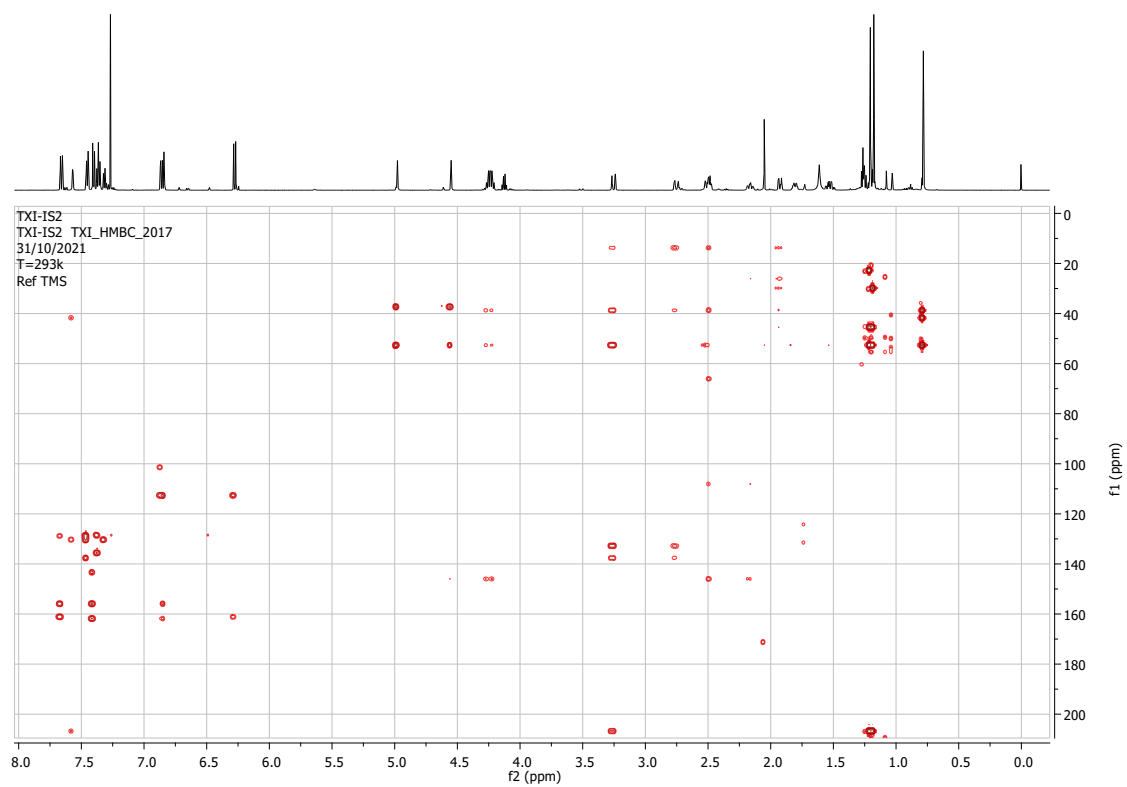

### HMBC spectrum of compound 3a

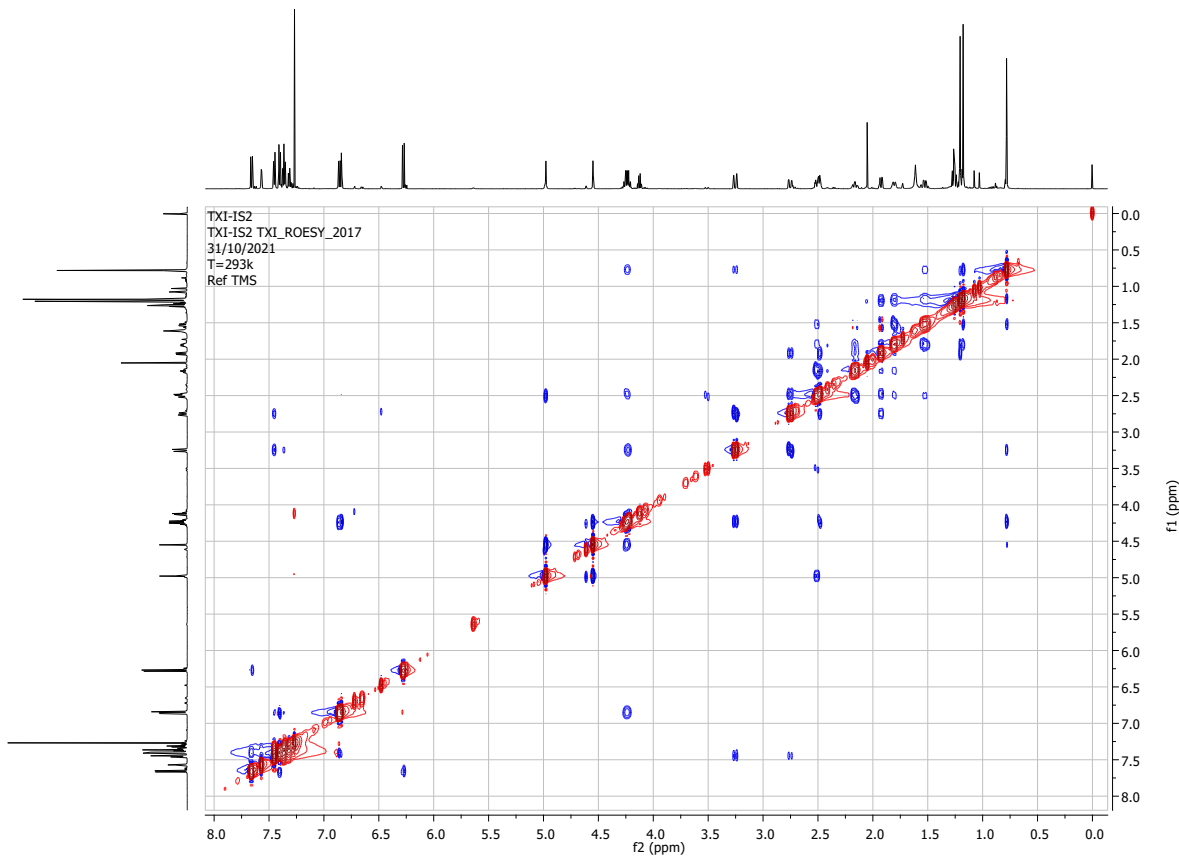

ROESY spectrum of compound 3a

IS2 #8 RT: 0.12 AV: 1 SM: 7G NL: 8.34E6  
T: FTMS + p ESIFull.ms [120.00-2000.00]

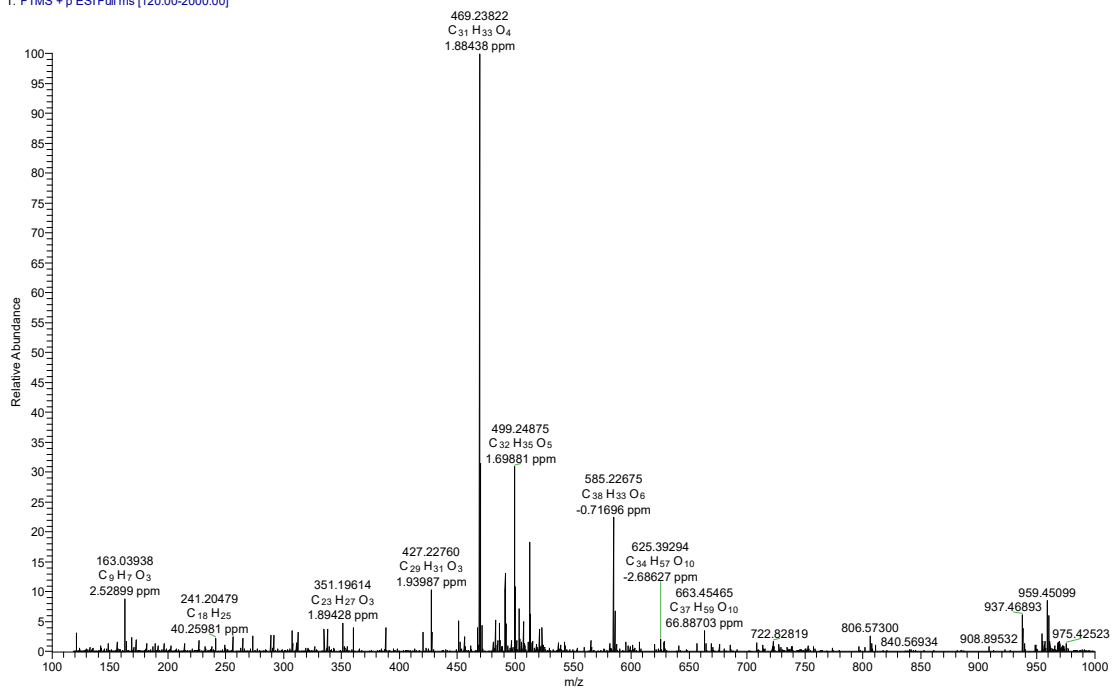

ESI-HRMS spectrum of compound 3a

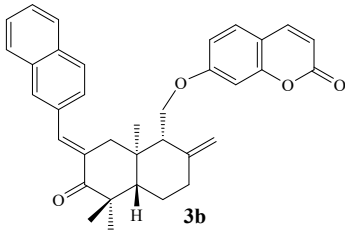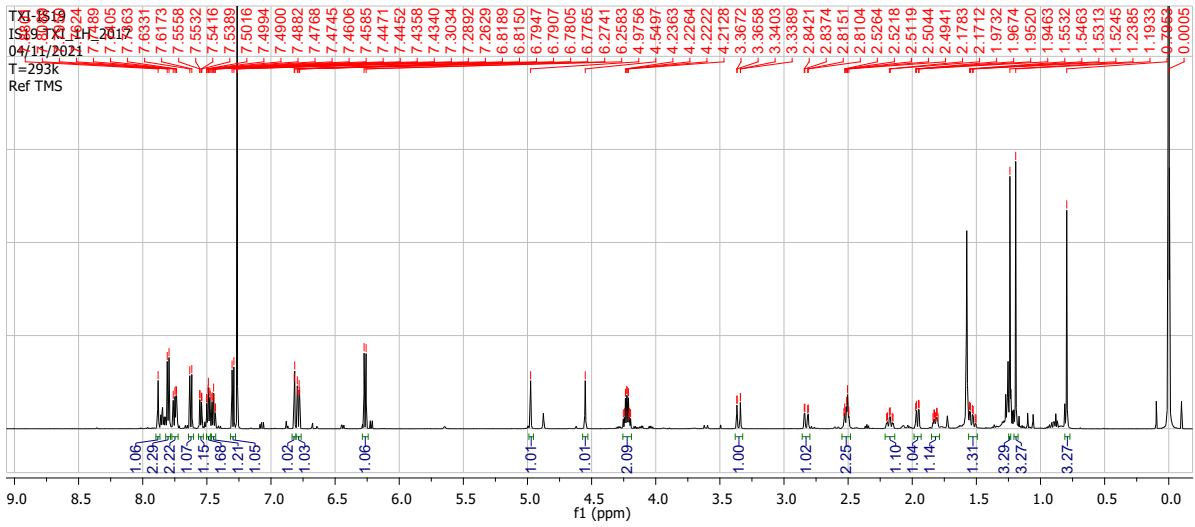

**<sup>1</sup>H NMR spectrum (600 MHz, CDCl<sub>3</sub>) of compound 3b**

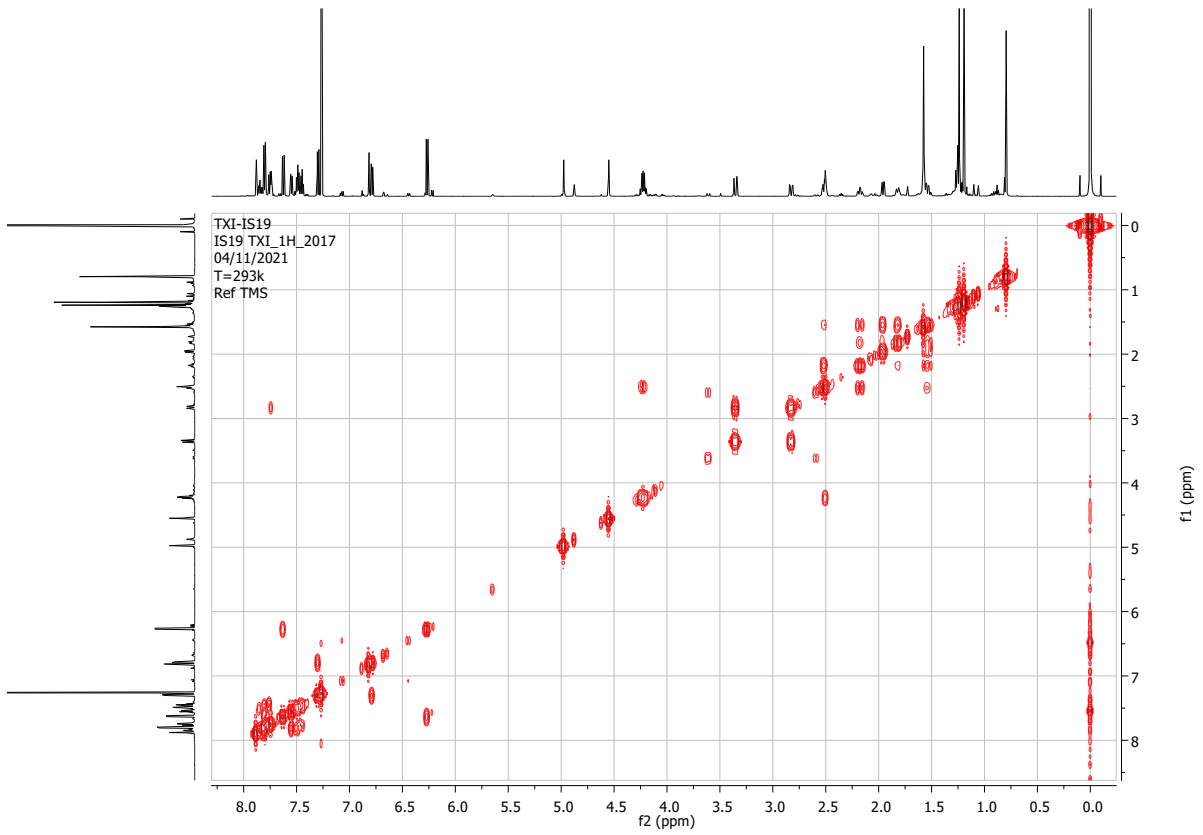

**COSY spectrum of compound 3b**



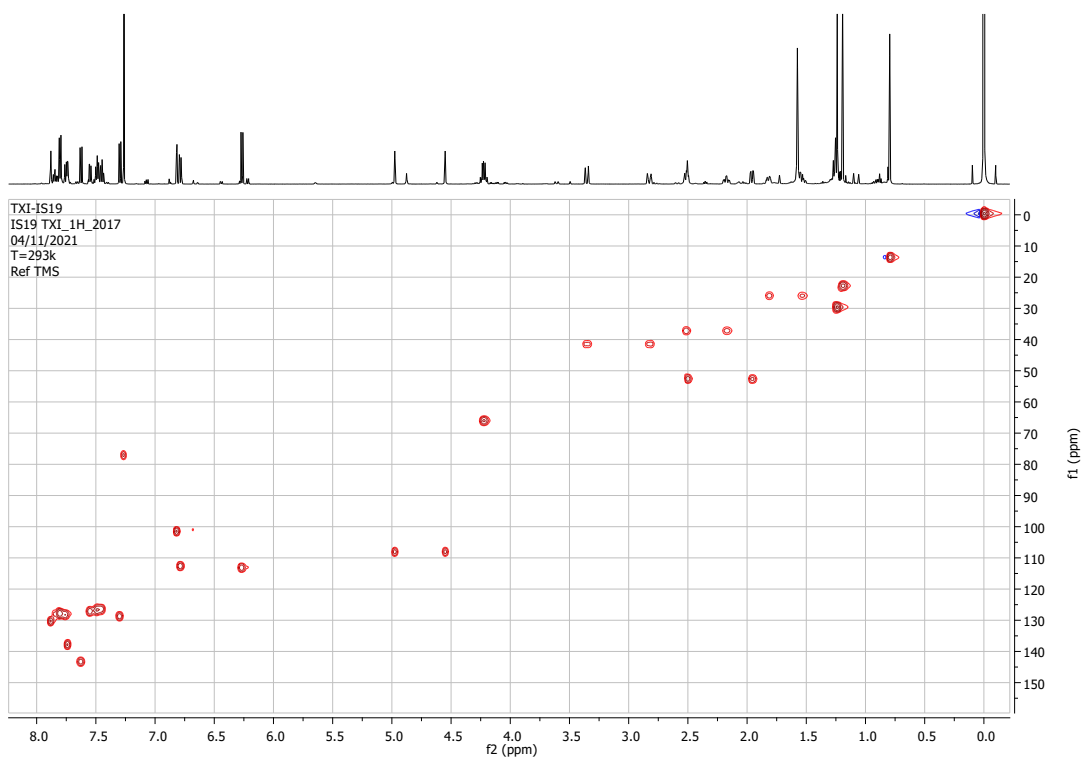

HSQC spectrum of compound 3b

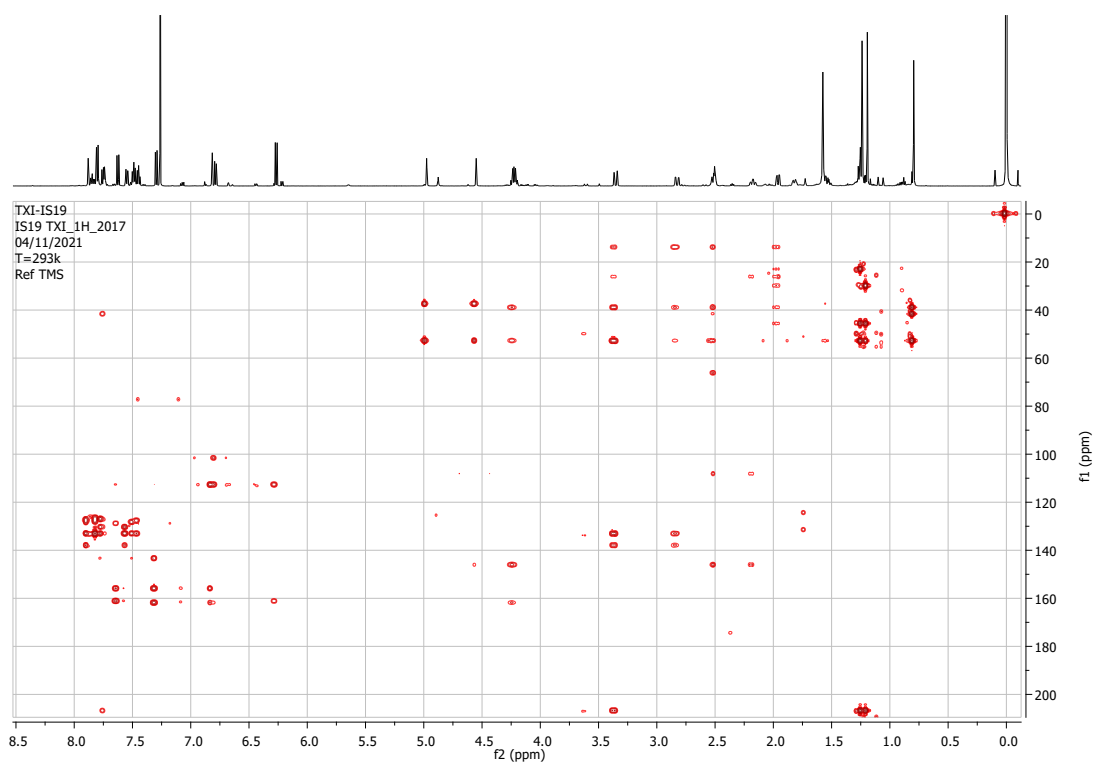

HMBC spectrum of compound 3b

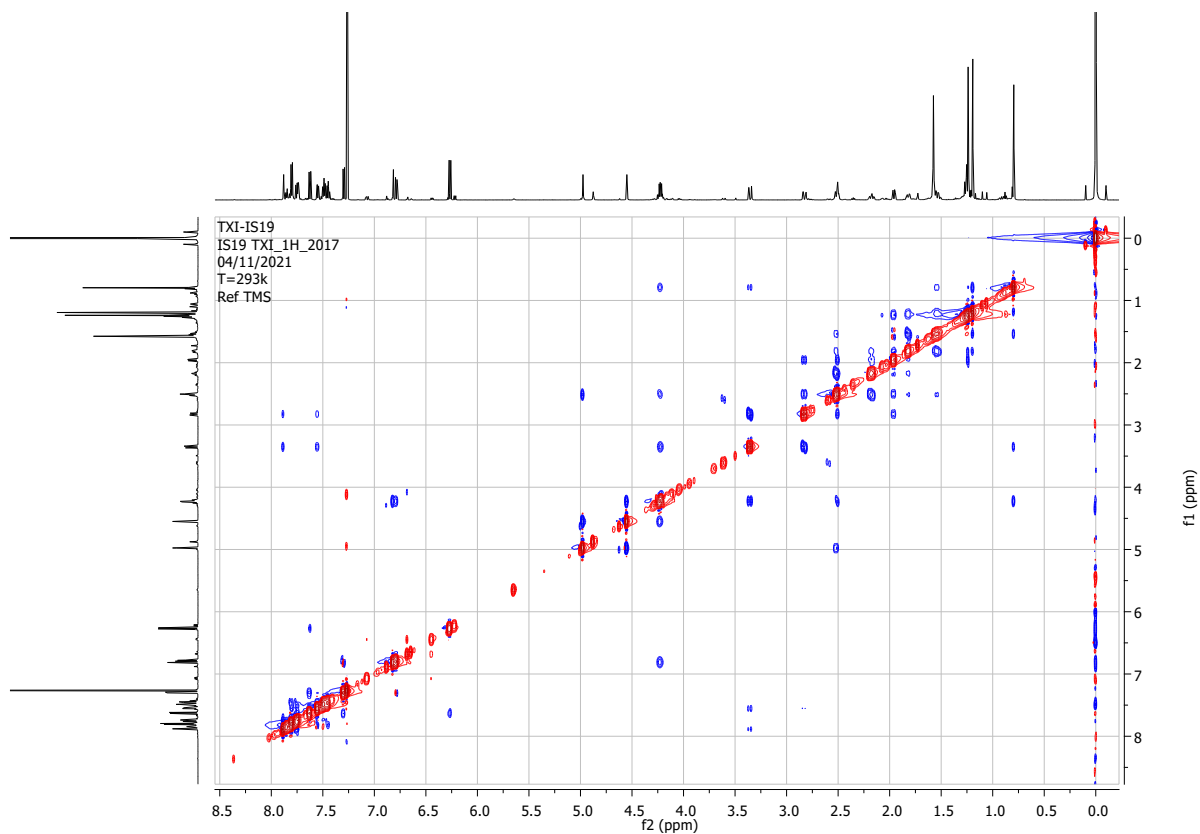

ROESY spectrum of compound 3b

IS19 #51 RT: 0.70 AV: 1 SM: 7G NL: 3.91E6  
T: FTMS + p ESI Full ms [120.00-2000.00]

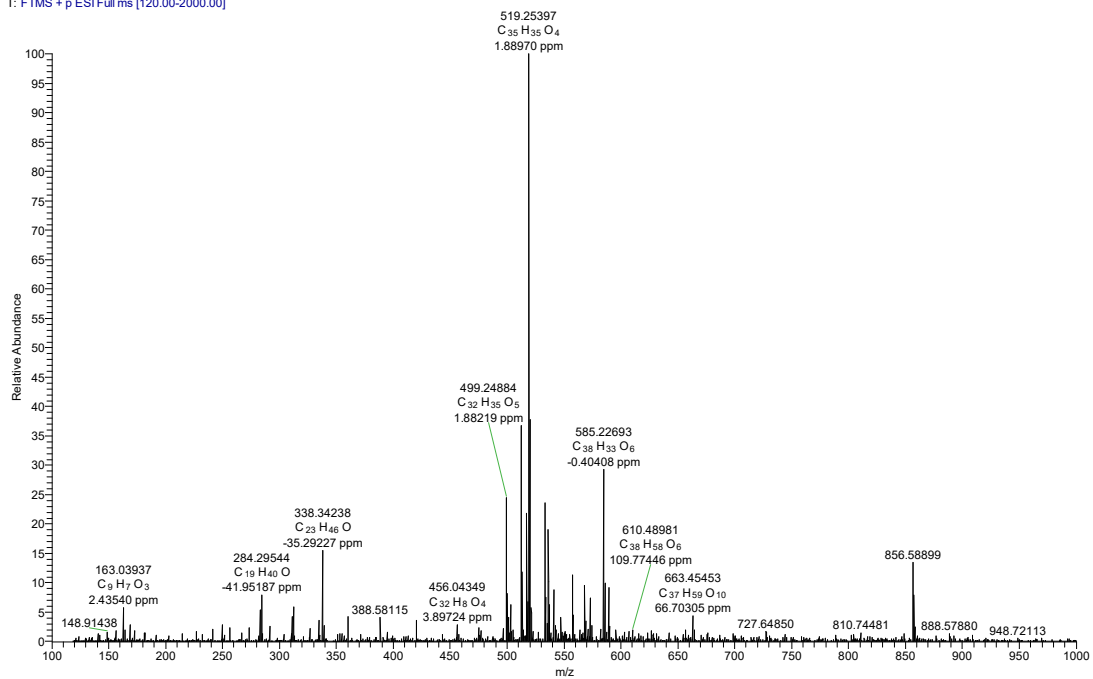

ESI-HRMS spectrum of compound 3b

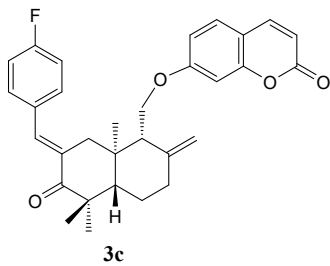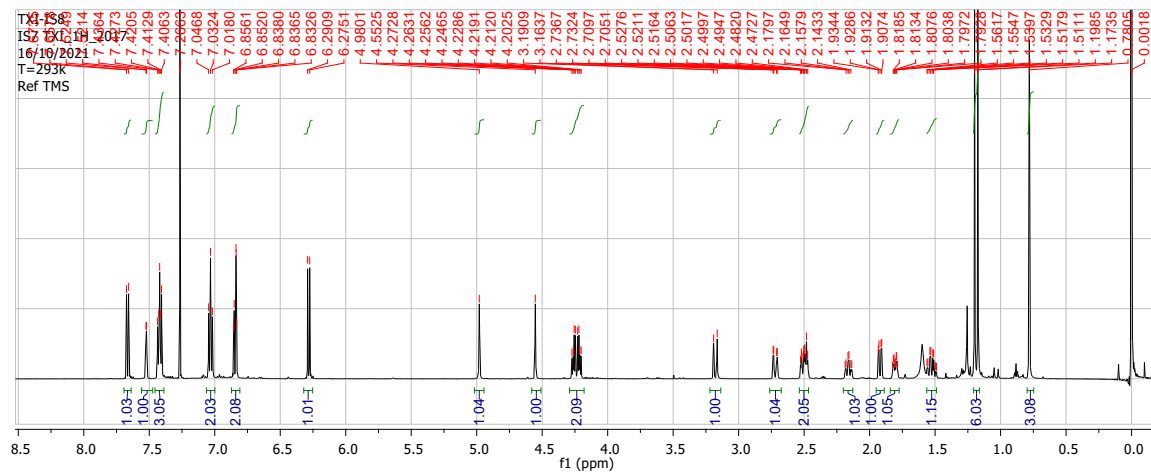

<sup>1</sup>H NMR spectrum (600 MHz, CDCl<sub>3</sub>) of compound 3c

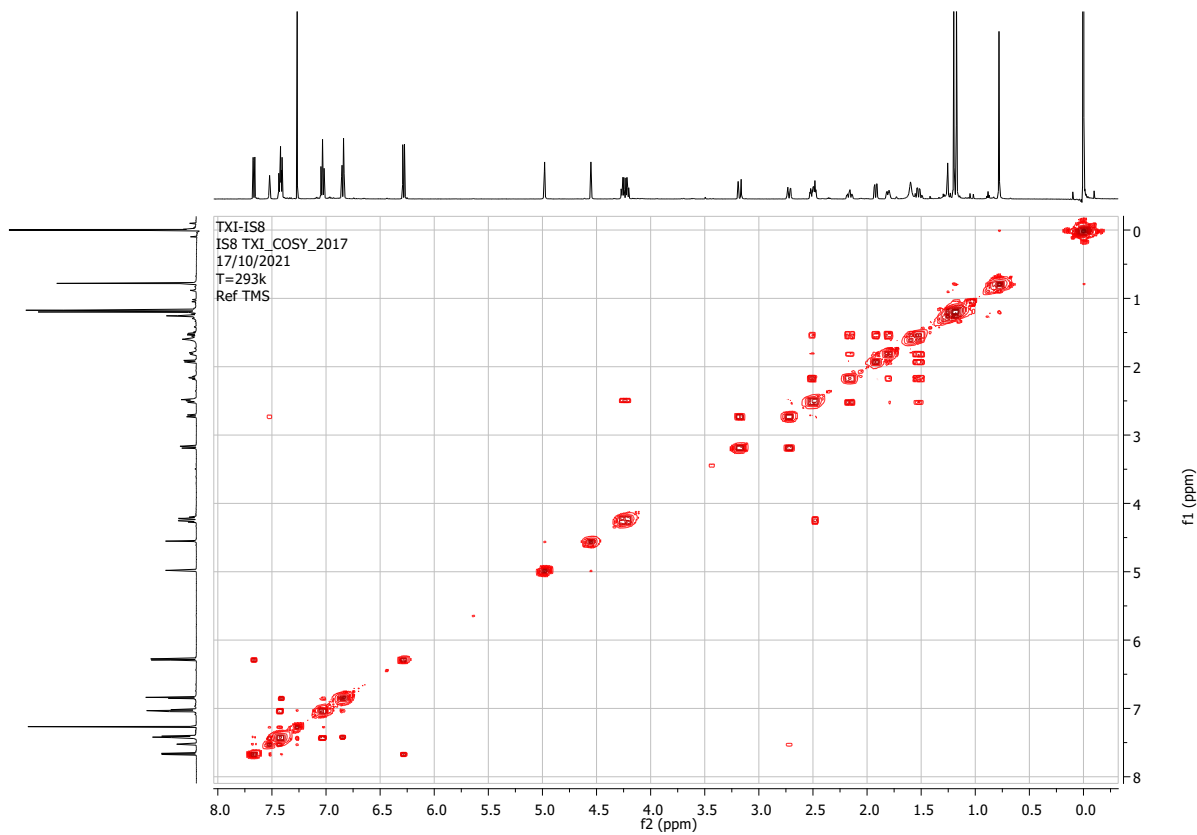

COSY spectrum of compound 3c

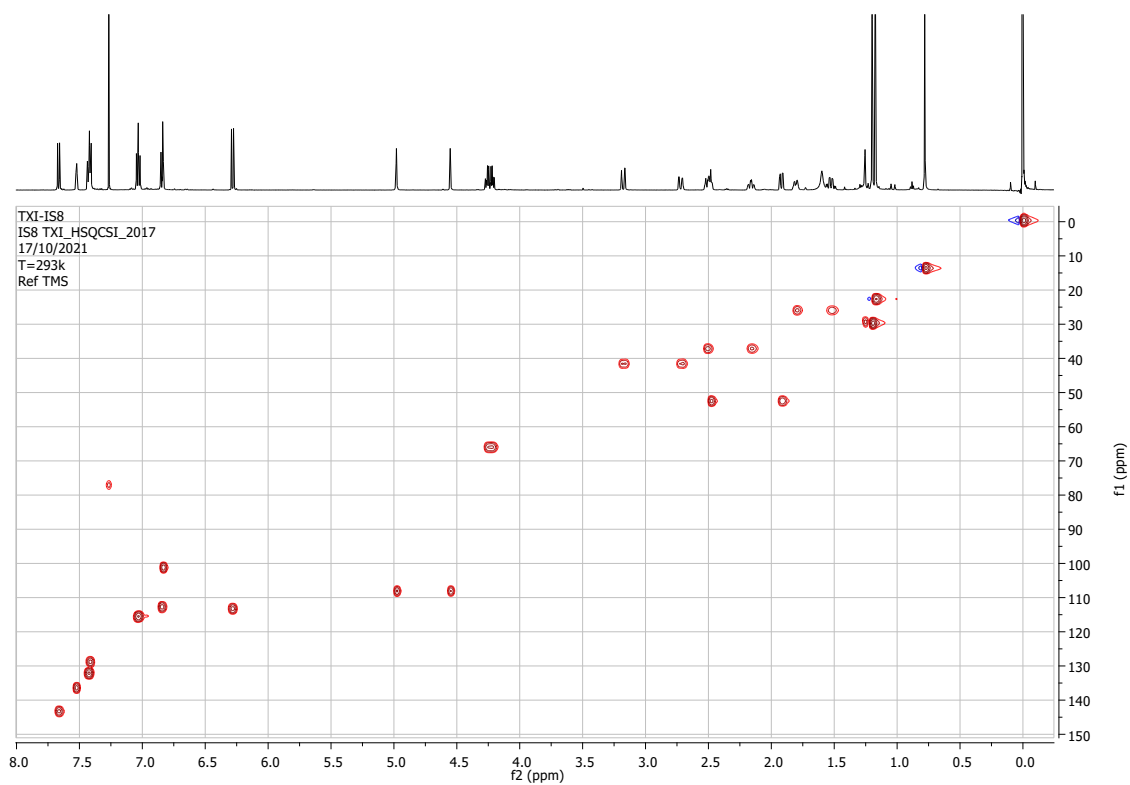

HSQC spectrum of compound 3c

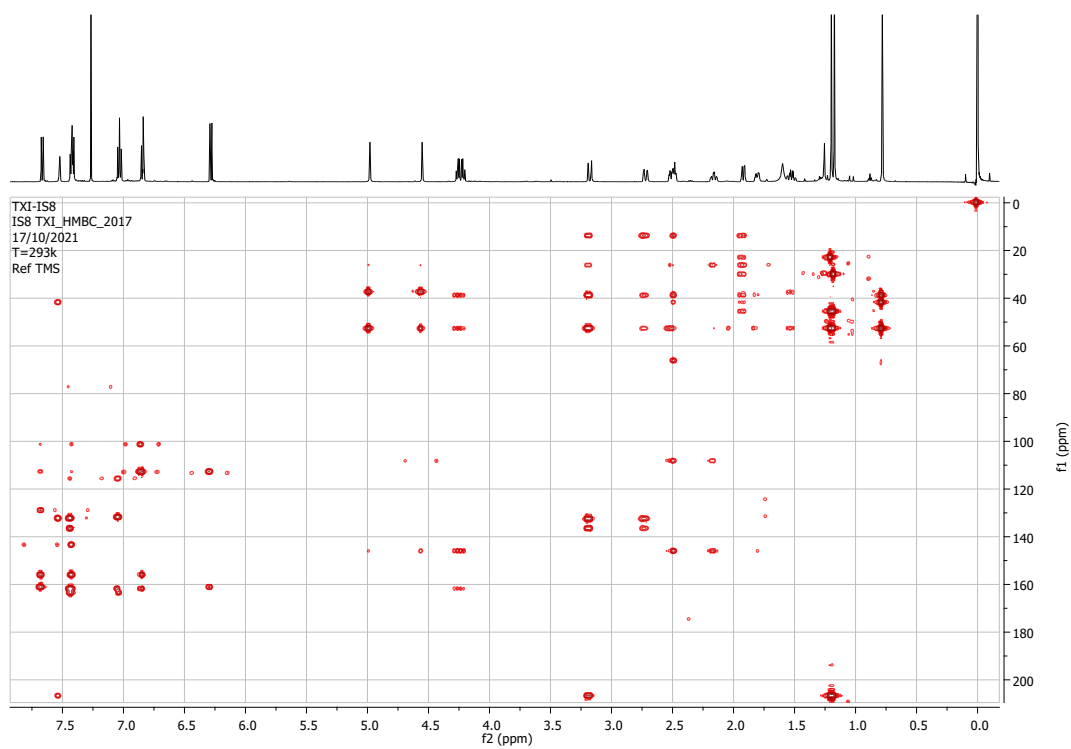

HMBC spectrum of compound 3c

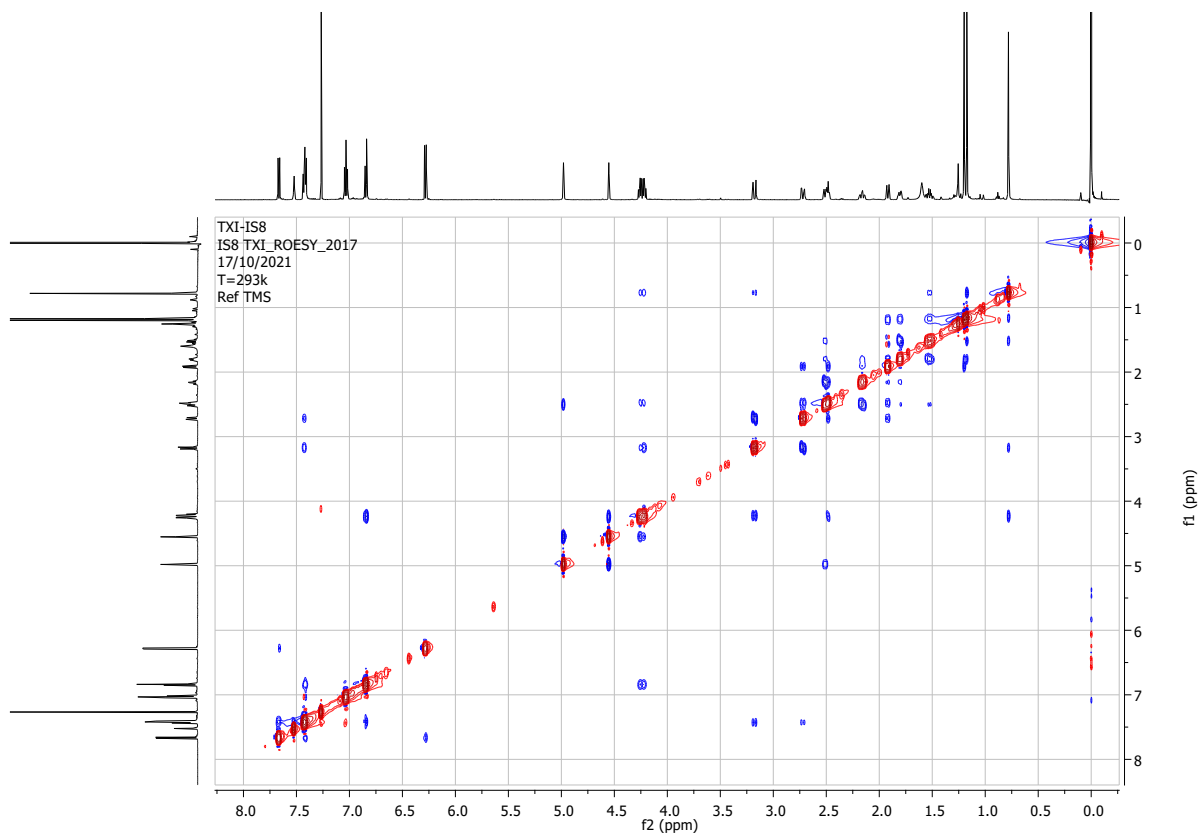

**ROESY spectrum of compound 3c**

IS8 #92 RT: 0.46 AV: 1 SB: 46 0.49-0.63, 0.04-0.15 SM: 7G NL: 1.59E5  
T: FTMS + p ESI Full ms [120.00-2000.00]

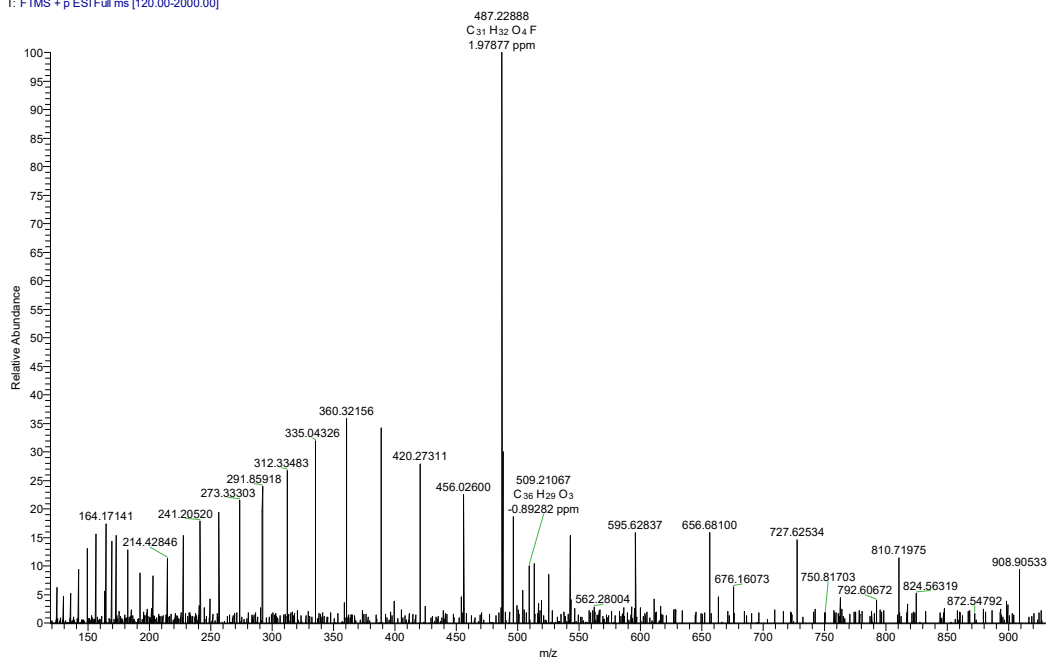

**ESI-HRMS spectrum of compound 3c**

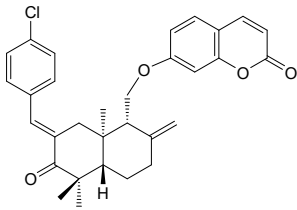

3d

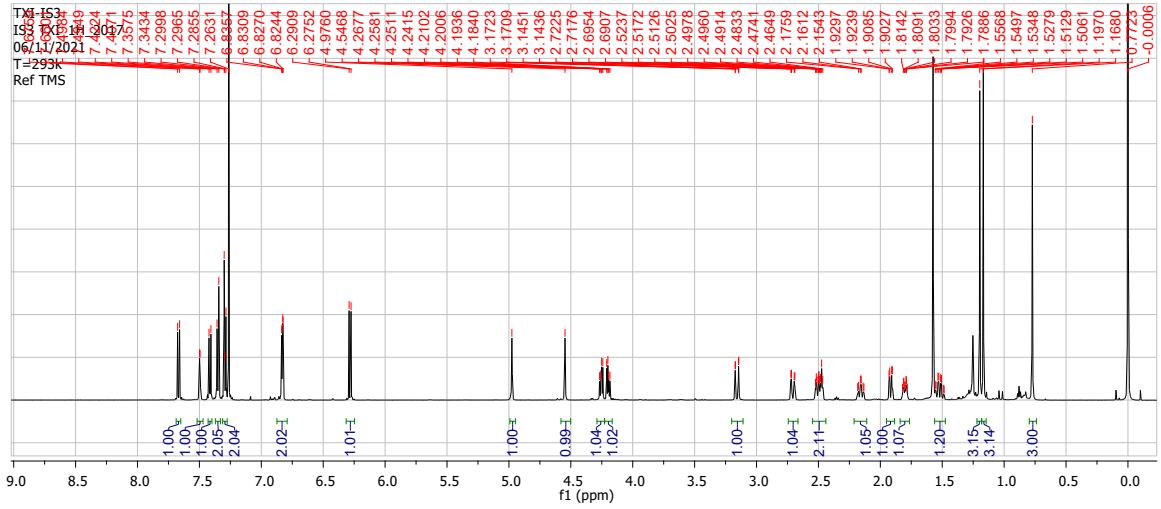

<sup>1</sup>H NMR spectrum (600 MHz, CDCl<sub>3</sub>) of compound 3d

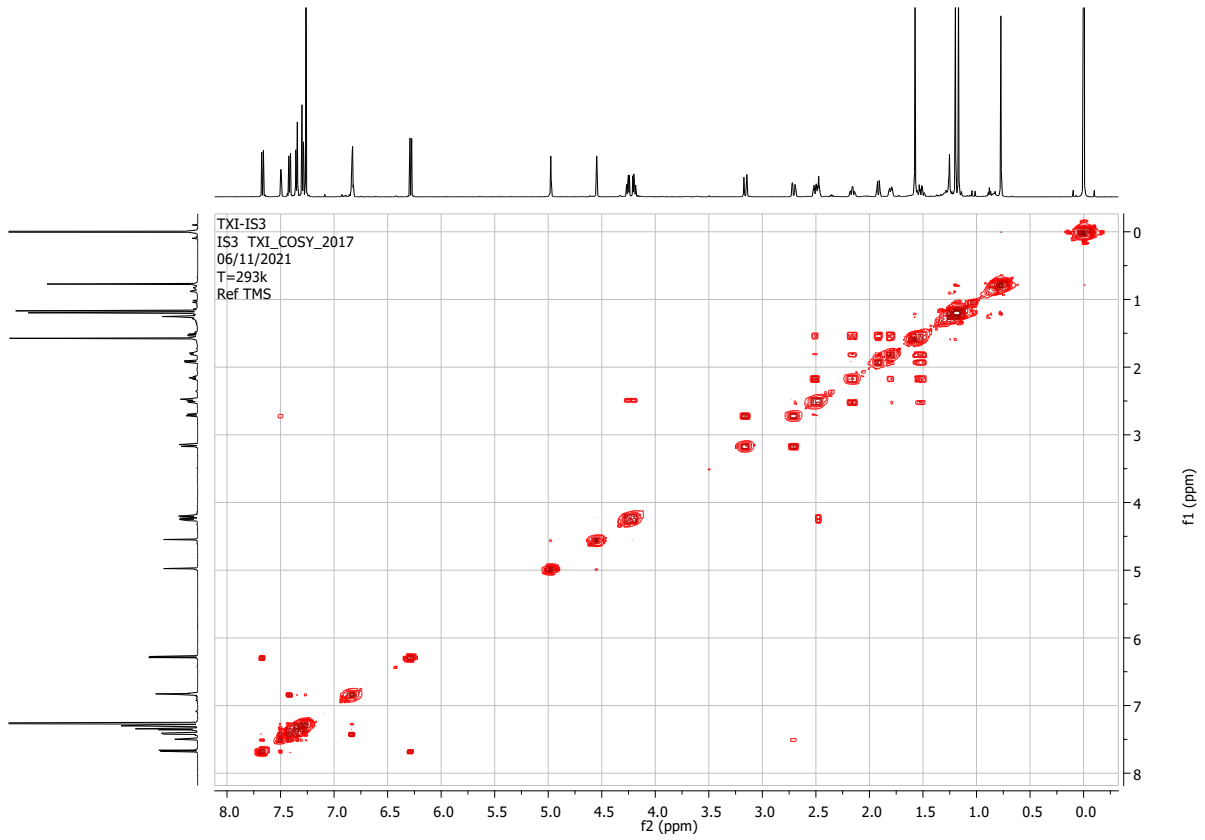

COSY spectrum of compound 3d

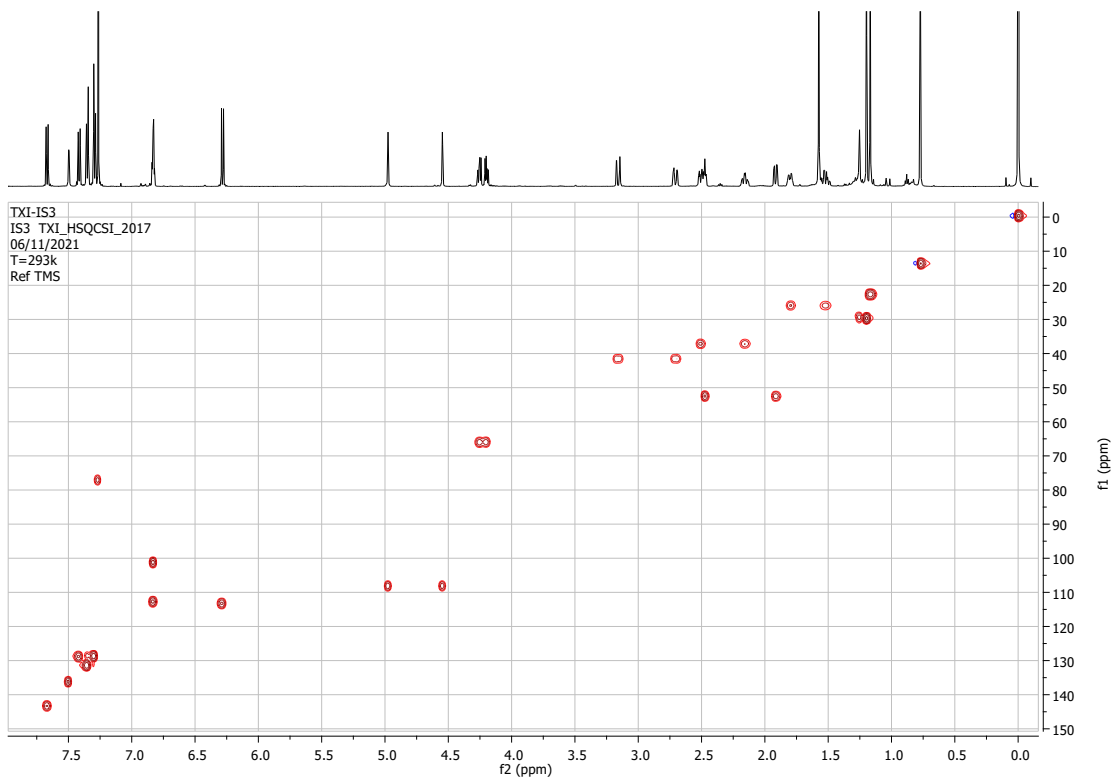

**HSQC spectrum of compound 3d**

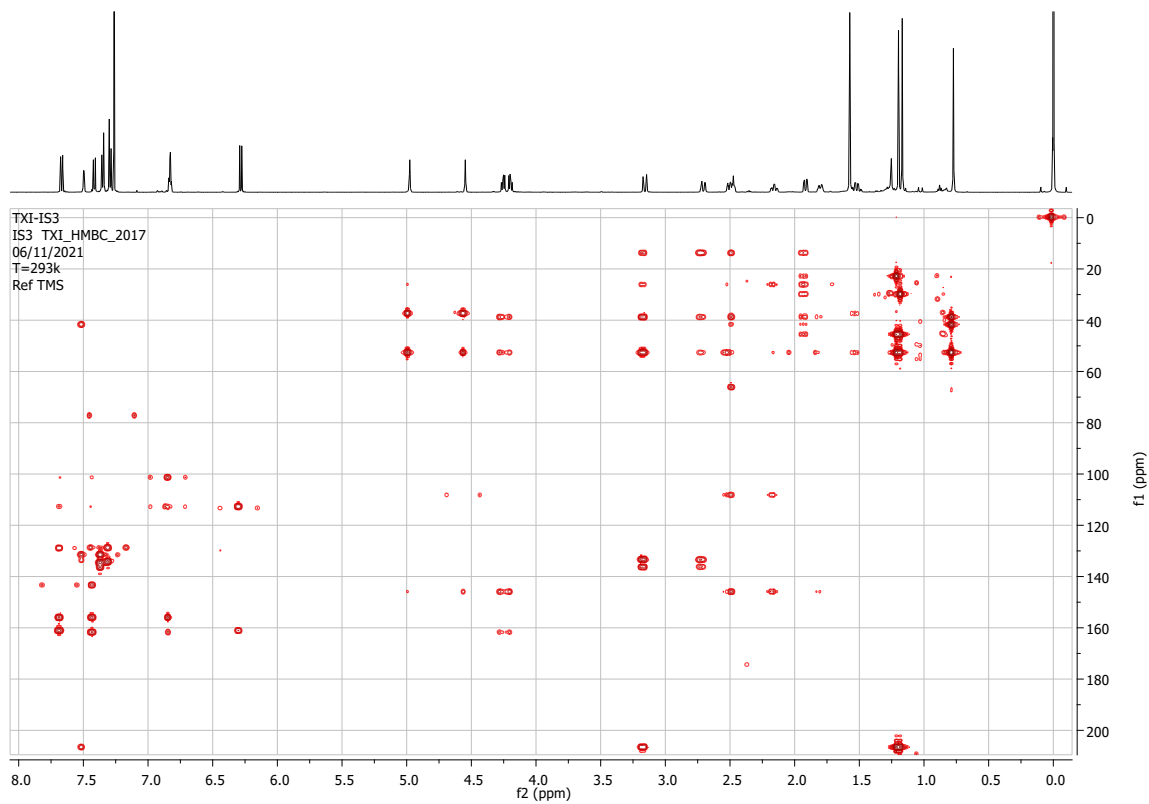

**HMBC spectrum of compound 3d**

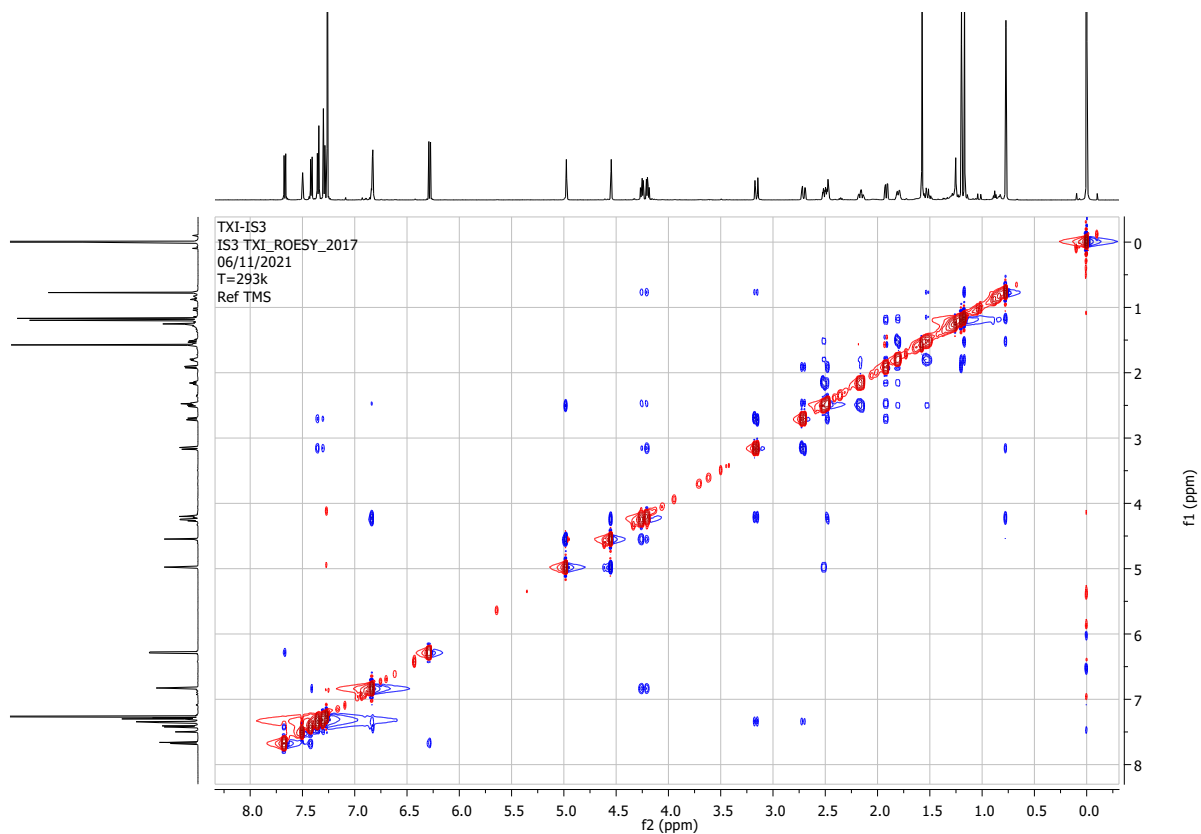

**ROESY spectrum of compound 3d**

IS3 #66 RT: 0.66 AV: 1 SM: 7G NL: 2.90E6  
T: FTMS + p ESI Full ms [120.00-2000.00]

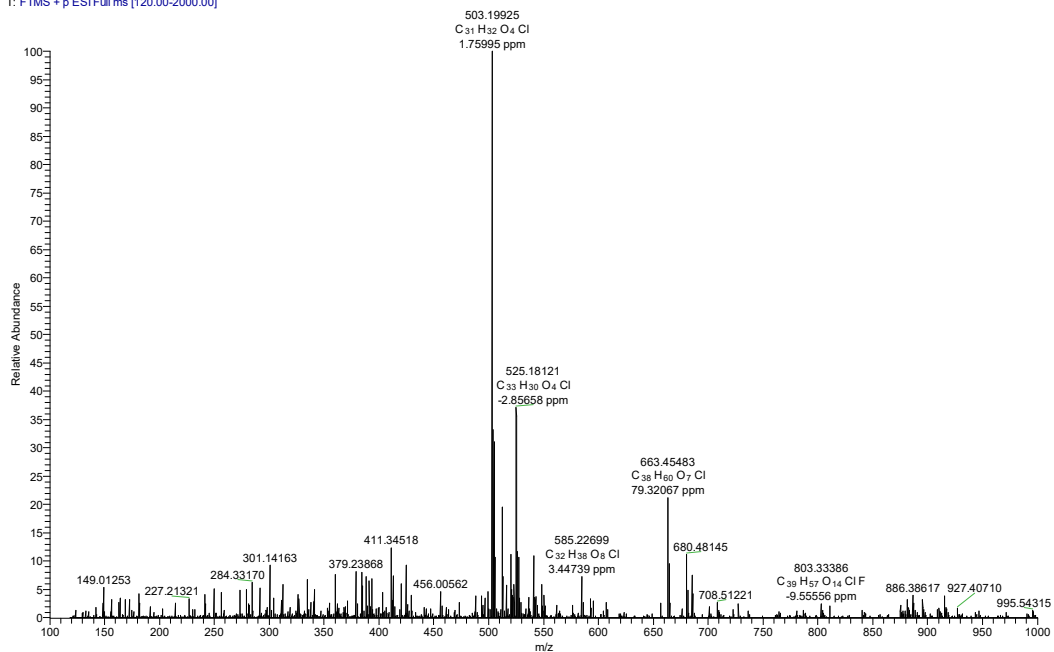

**ESI-HRMS spectrum of compound 3d**



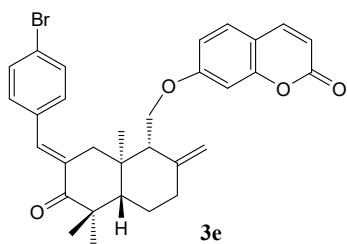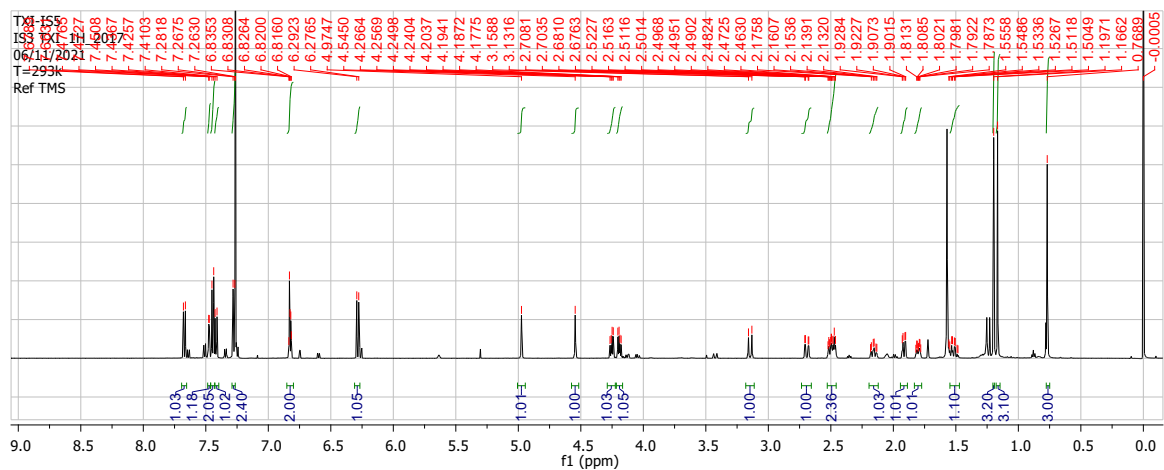

<sup>1</sup>H NMR spectrum (600 MHz, CDCl<sub>3</sub>) of compound **3e**

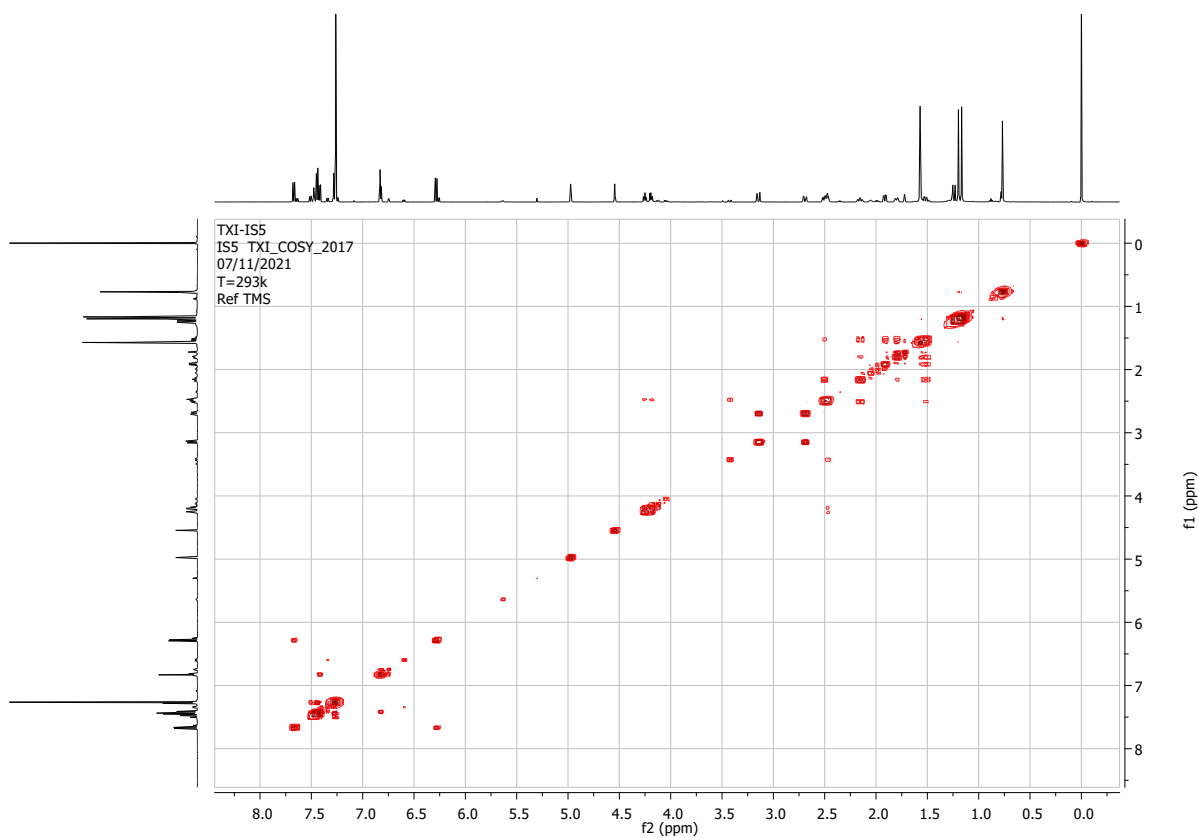

COSY spectrum of compound **3e**

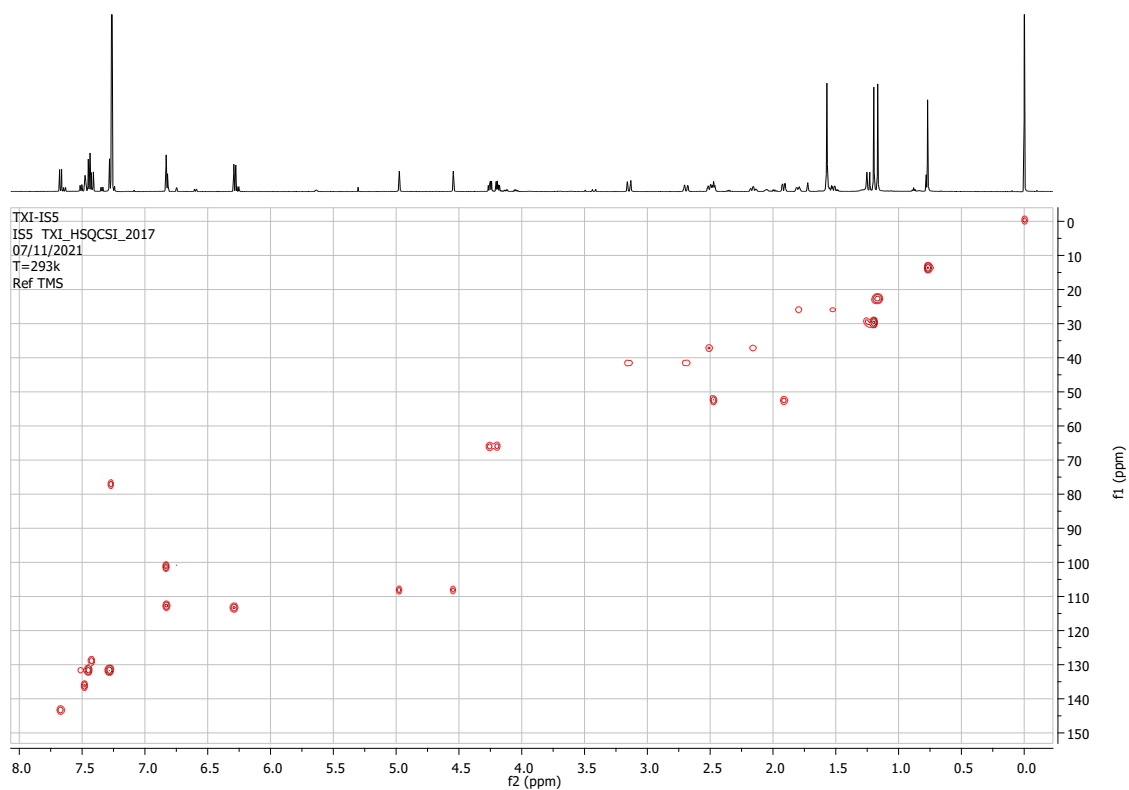

**HSQC spectrum of compound 3e**

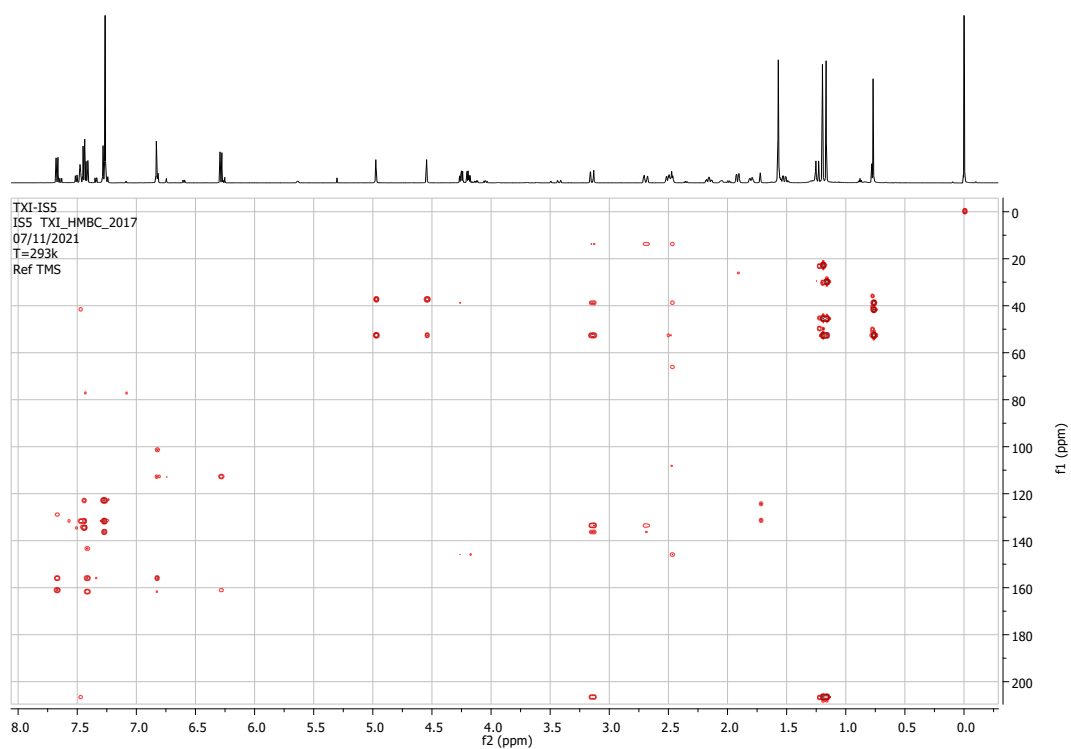

**HMBC spectrum of compound 3e**

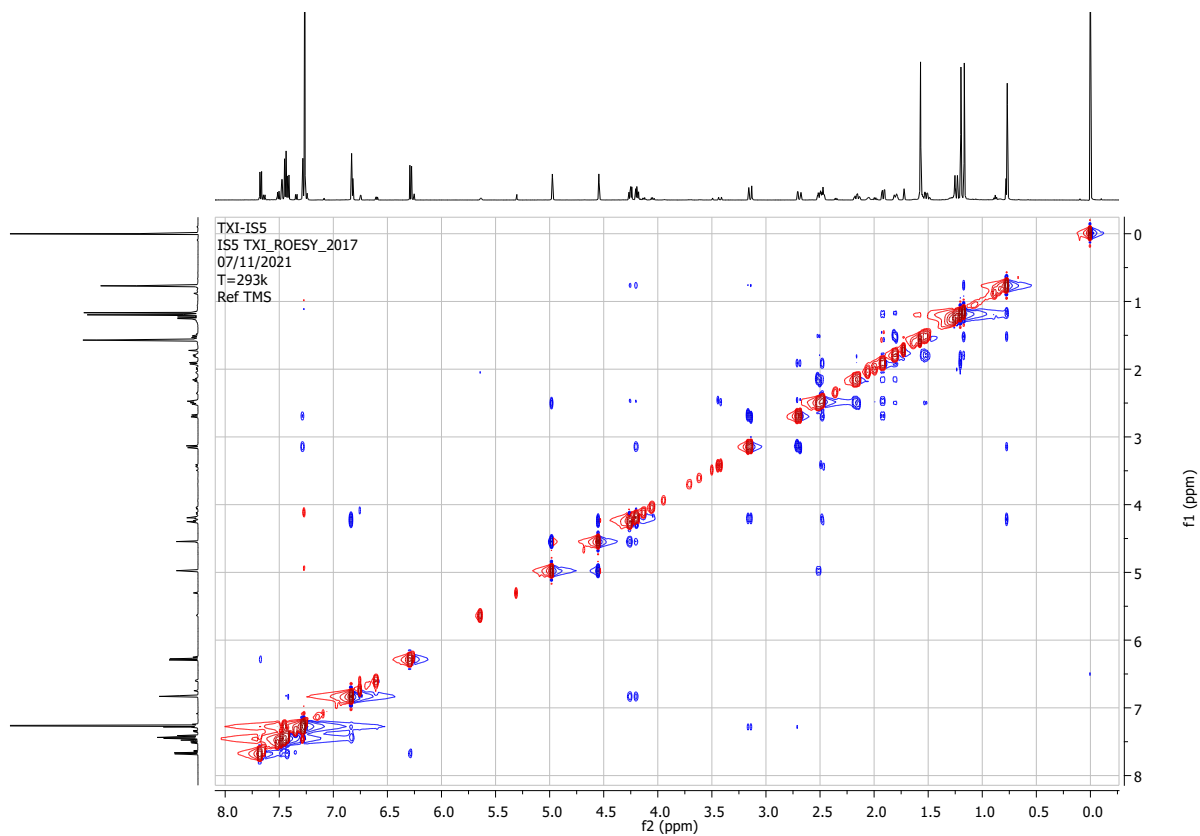

ROESY spectrum of compound 3e

IS5 #258 RT: 1.90 AV: 1 SM: 7G NL: 1.97E7  
T: FTMS + p ESI Full ms [120.00-2000.00]

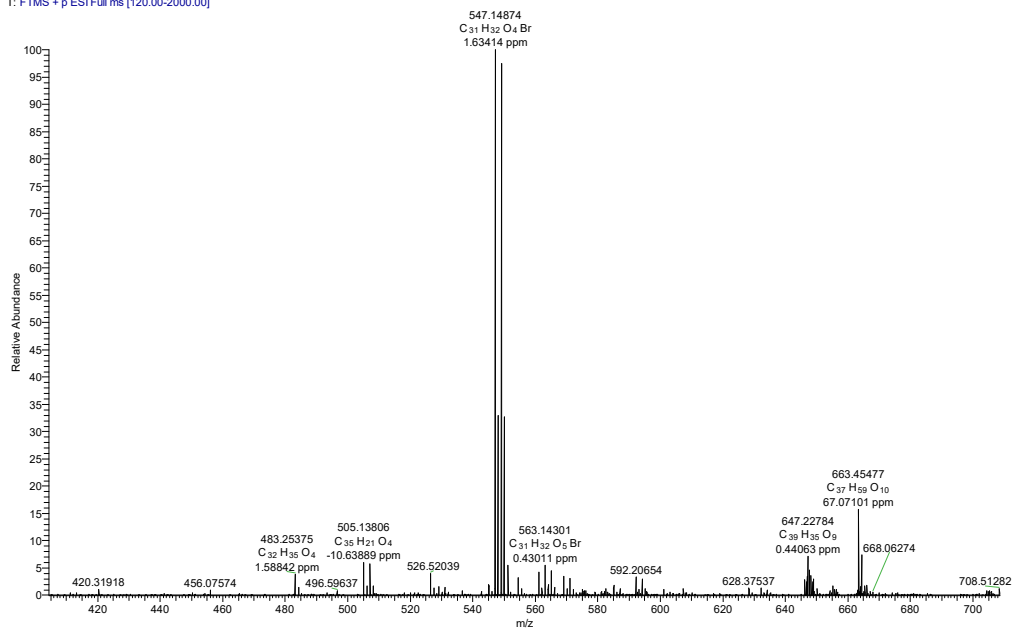

ESI-HRMS spectrum of compound 3e

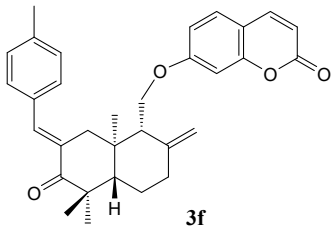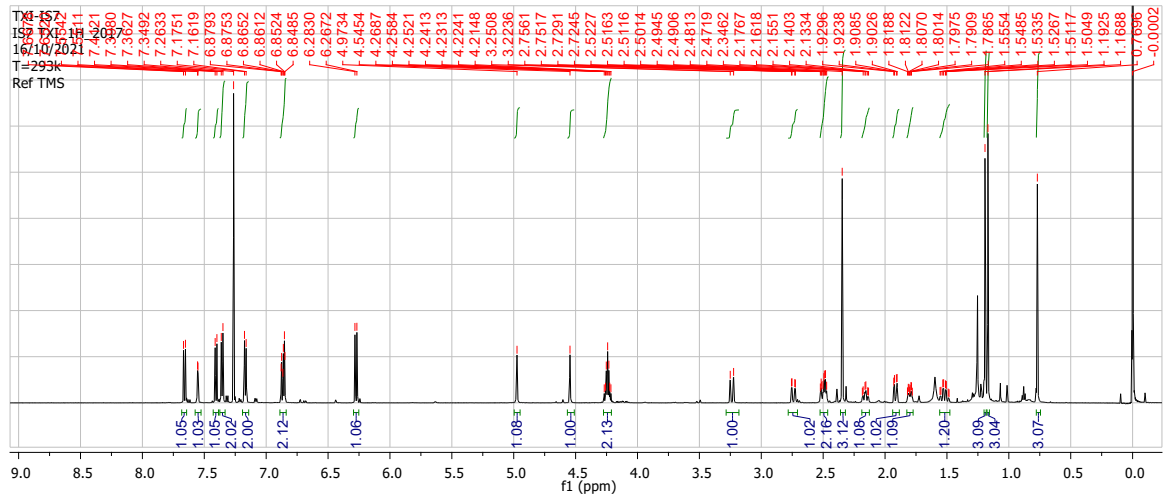

**<sup>1</sup>H NMR spectrum (600 MHz, CDCl<sub>3</sub>) of compound 3f**

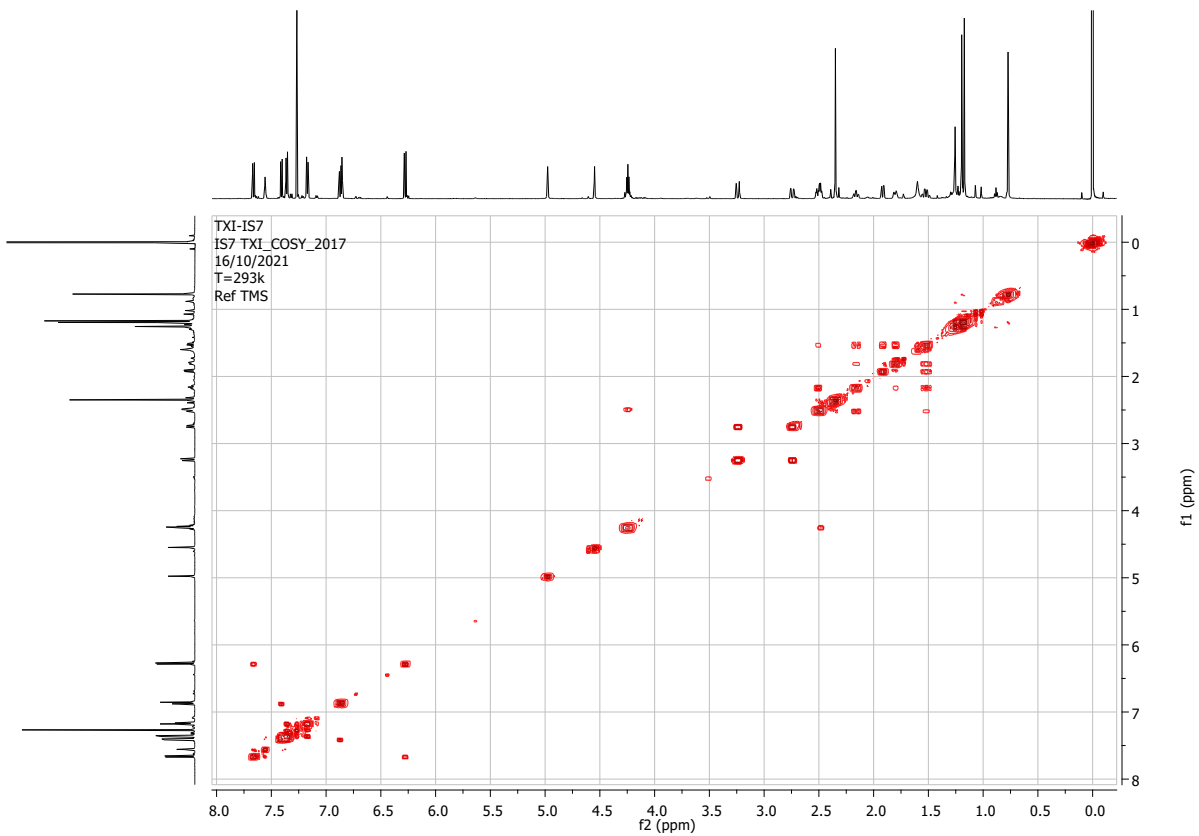

**COSY spectrum of compound 3f**

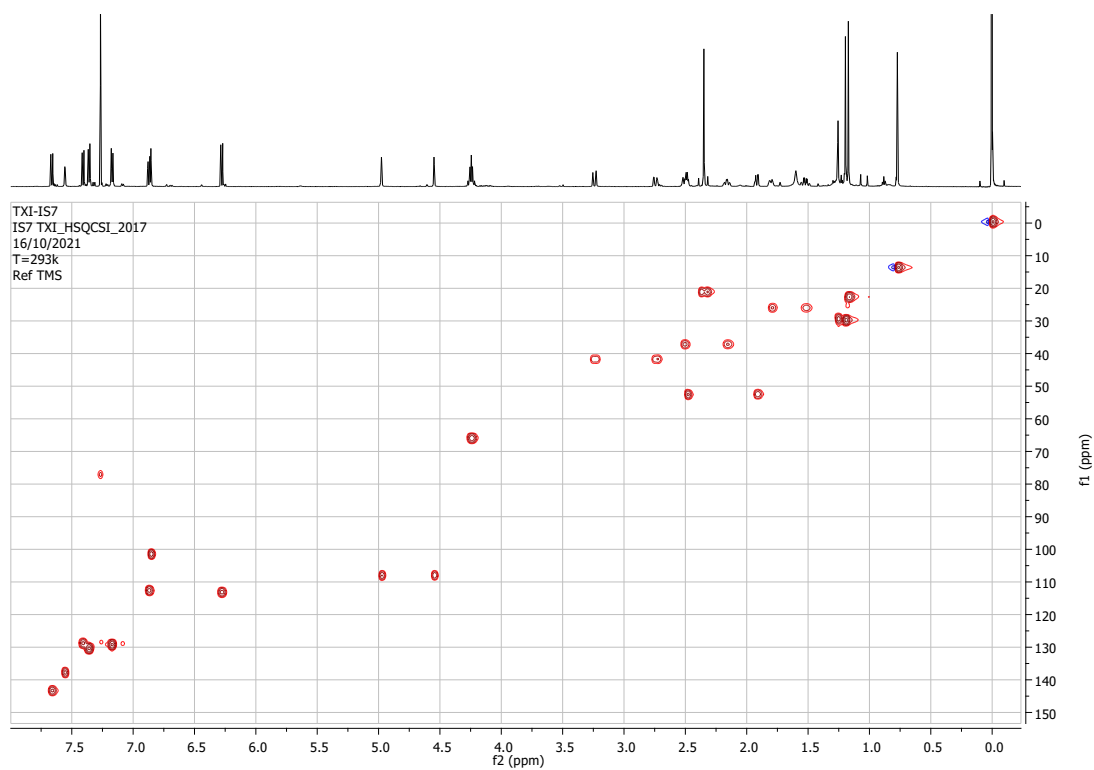

HSQC spectrum of compound 3f

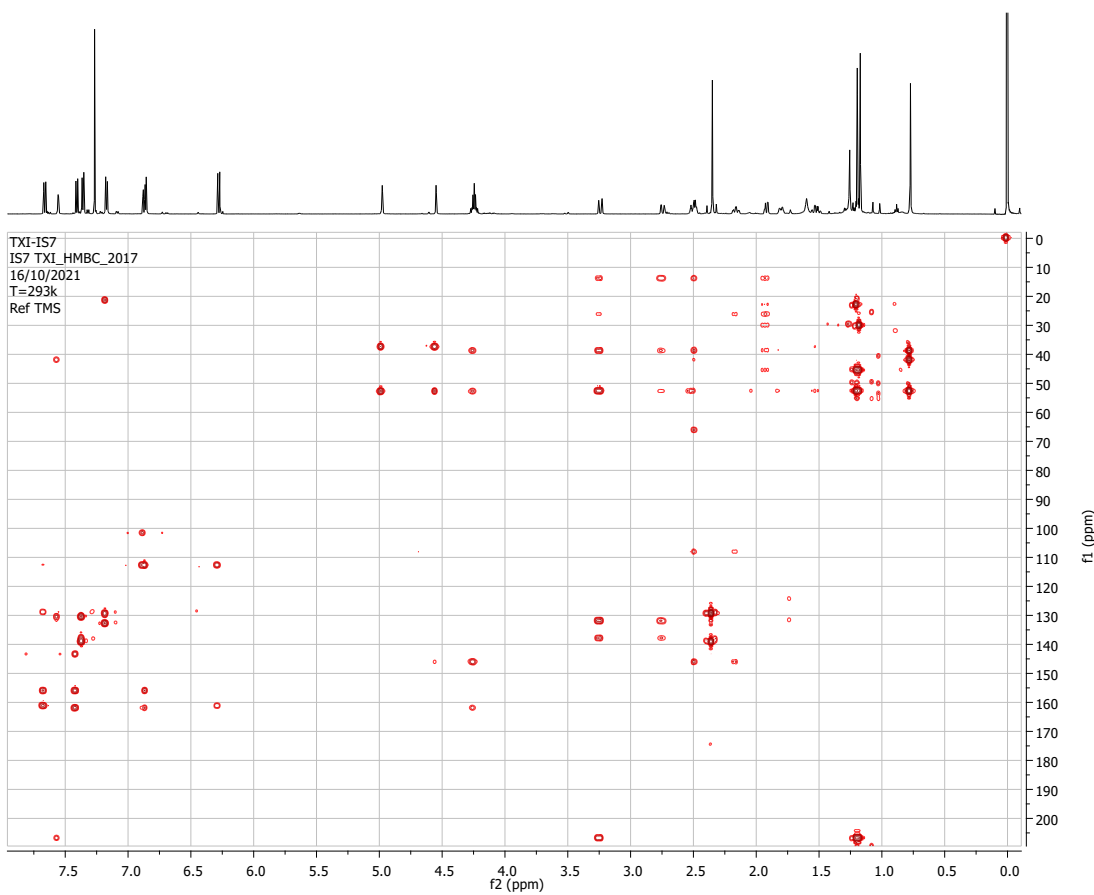

HMBC spectrum of compound 3f

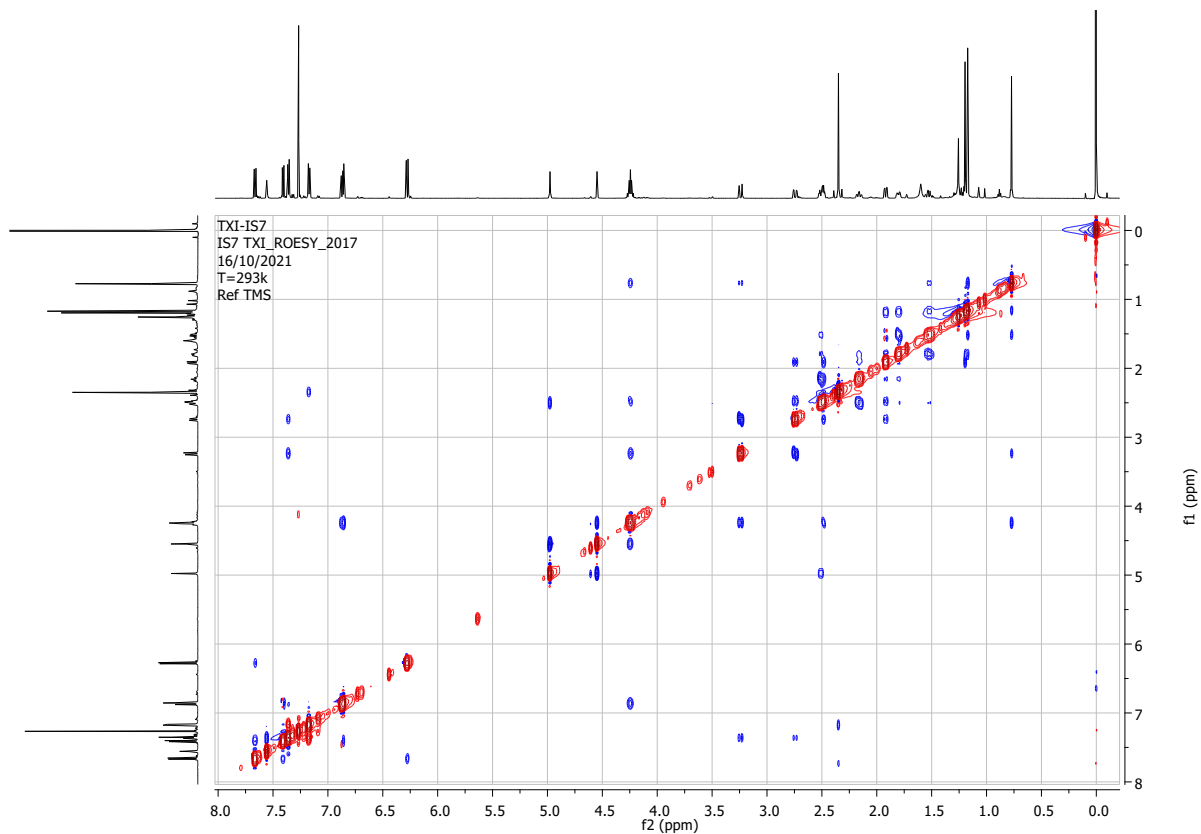

**ROESY spectrum of compound 3f**

IS7pos #1454 RT: 11.24 AV: 1 SM: 7G NL: 6.11E6  
T: FTMS + p ESI Full ms [120.00-2000.00]

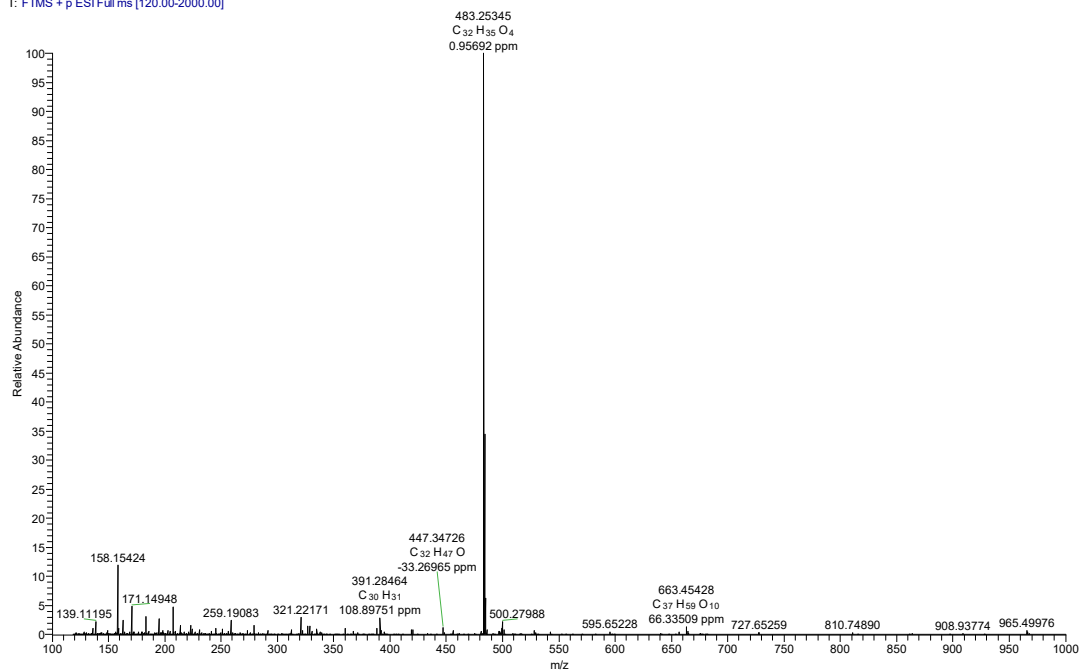

**ESI-HRMS spectrum of compound 3f**

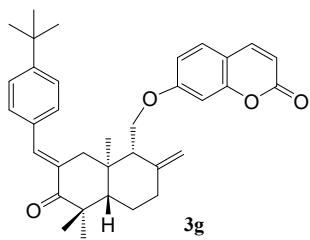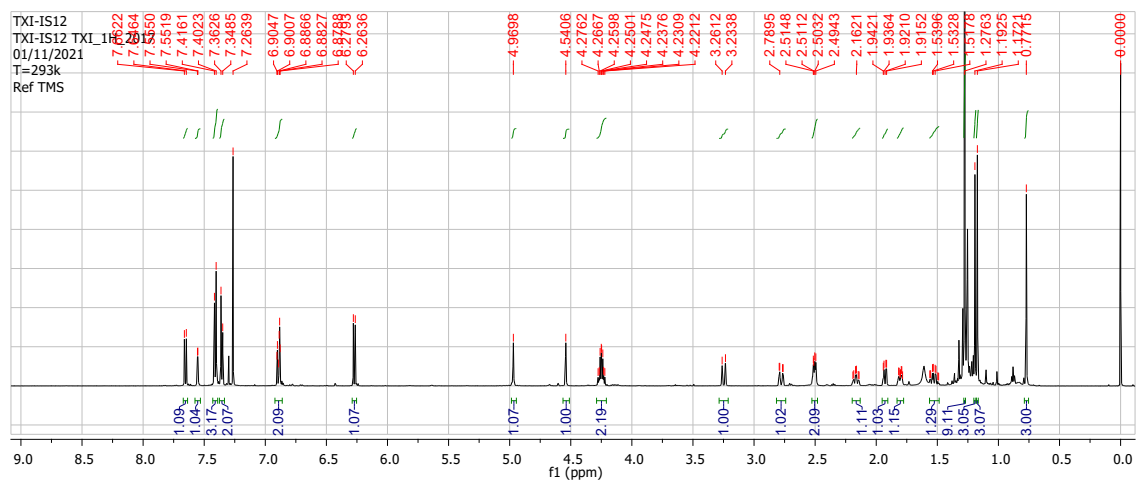

**<sup>1</sup>H NMR spectrum (600 MHz, CDCl<sub>3</sub>) of compound 3g**

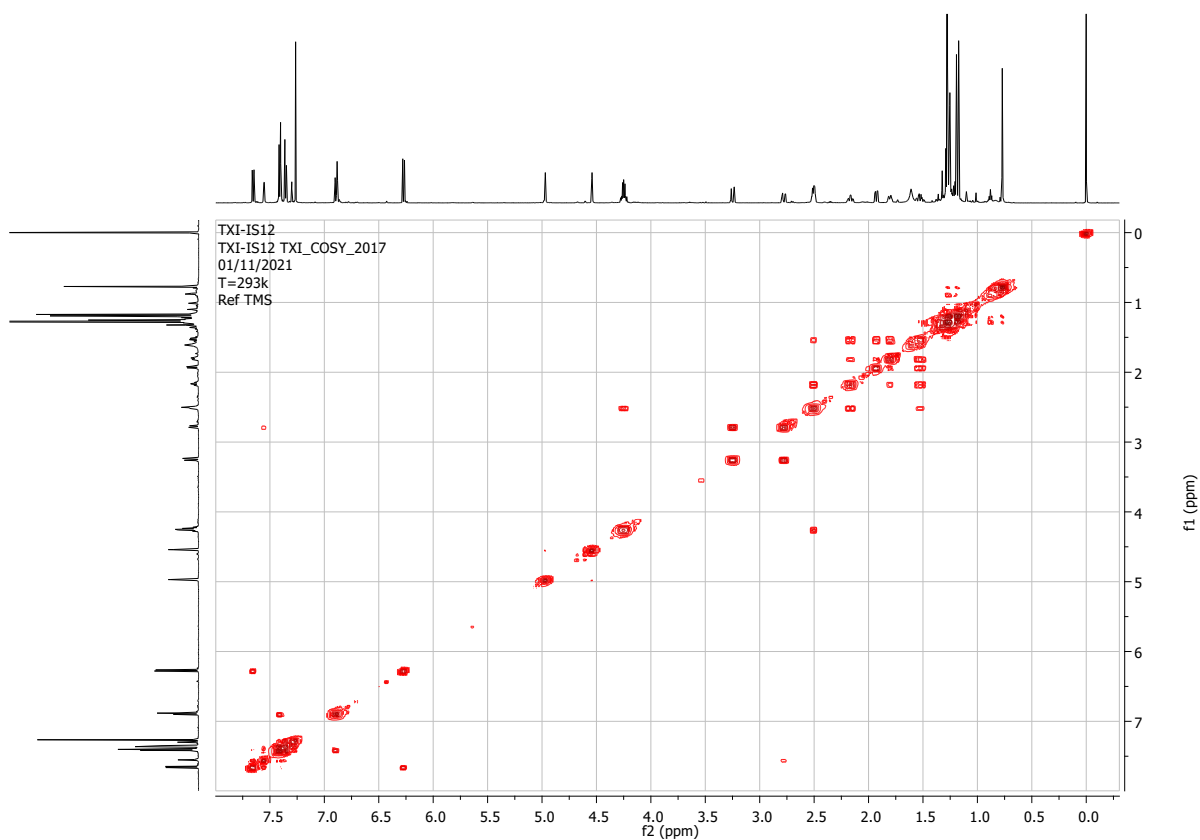

**COSY spectrum of compound 3g**

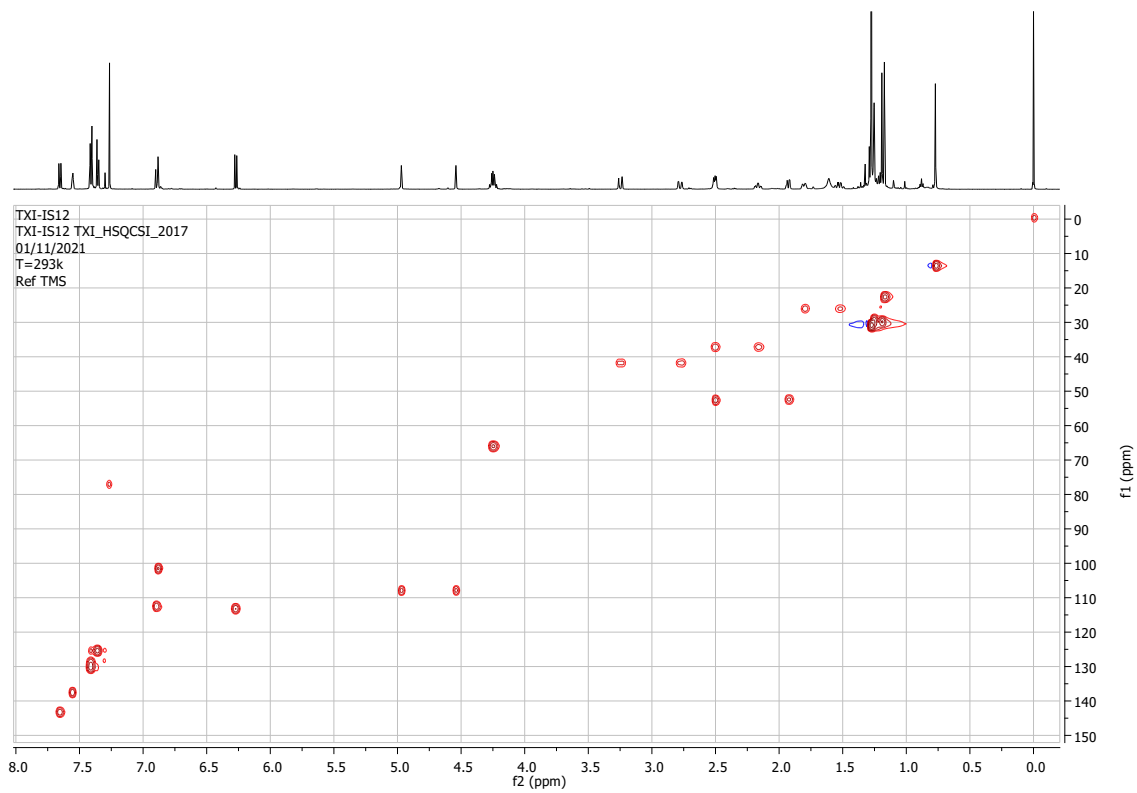

**HSQC spectrum of compound 3g**

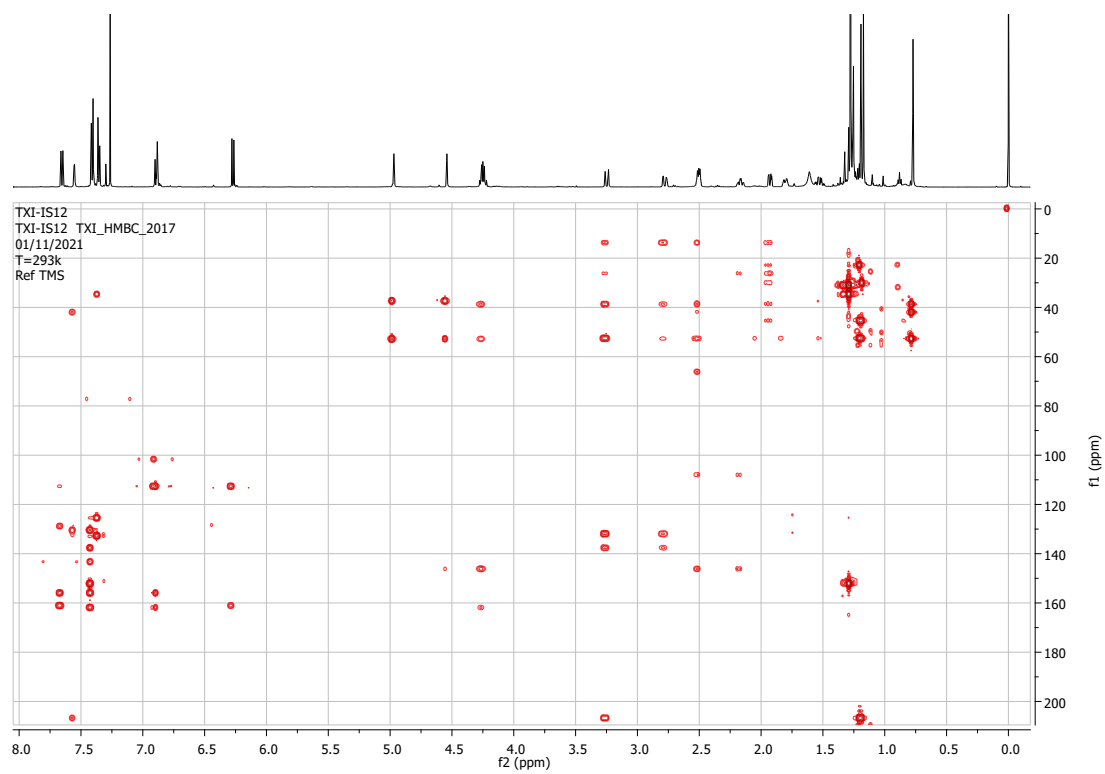

**HMBC spectrum of compound 3g**



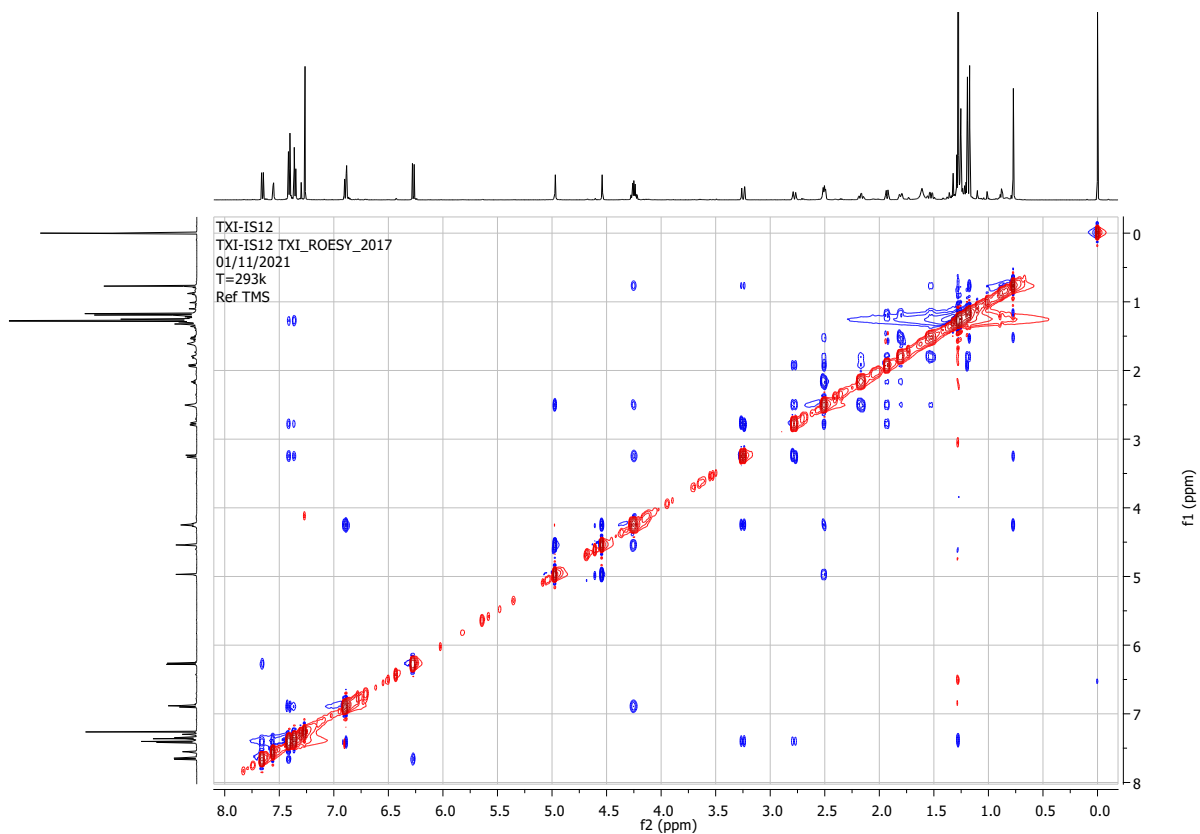

**ROESY spectrum of compound 3g**

IS12 #33 RT: 0.25 AV: 1 SM: 7G NL: 9.12E6  
T: FTMS + p ESI Full ms [120.00-2000.00]

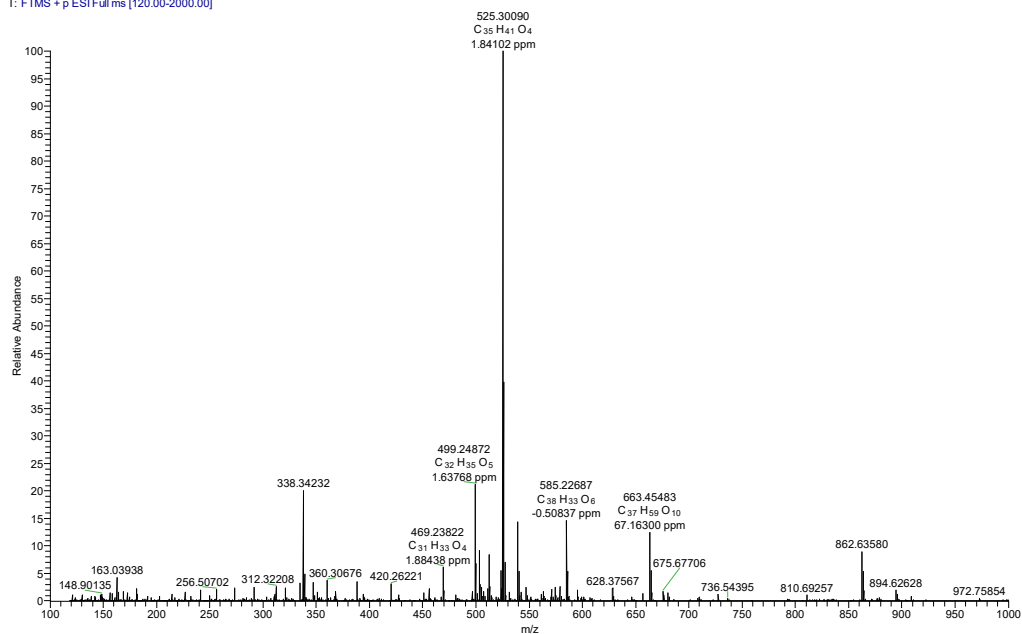

**ESI-HRMS spectrum of compound 3g**

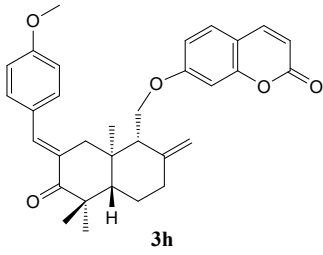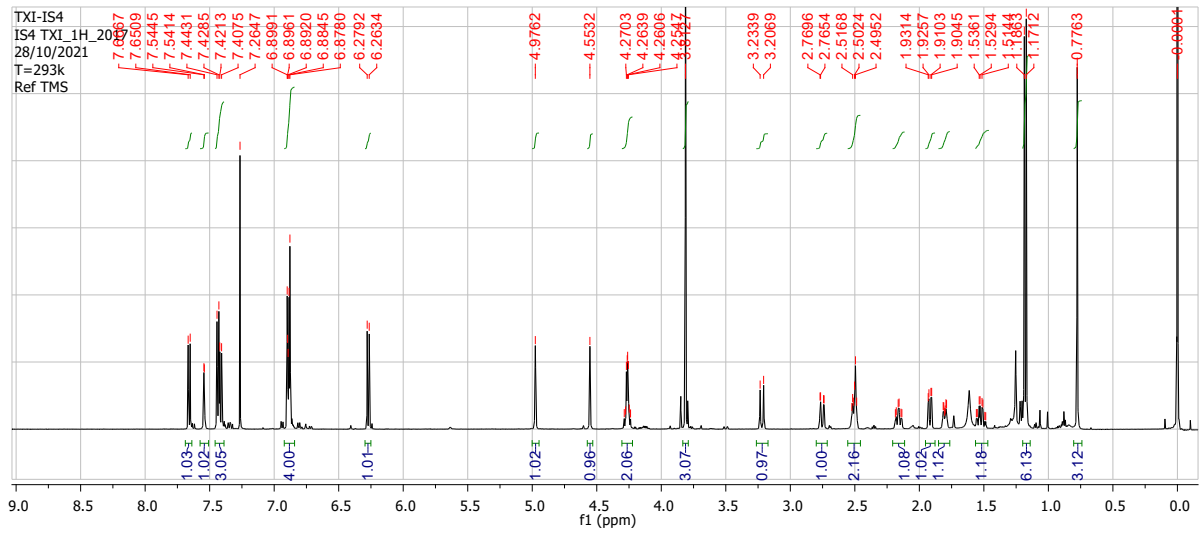

**<sup>1</sup>H NMR spectrum (600 MHz, CDCl<sub>3</sub>) of compound 3h**

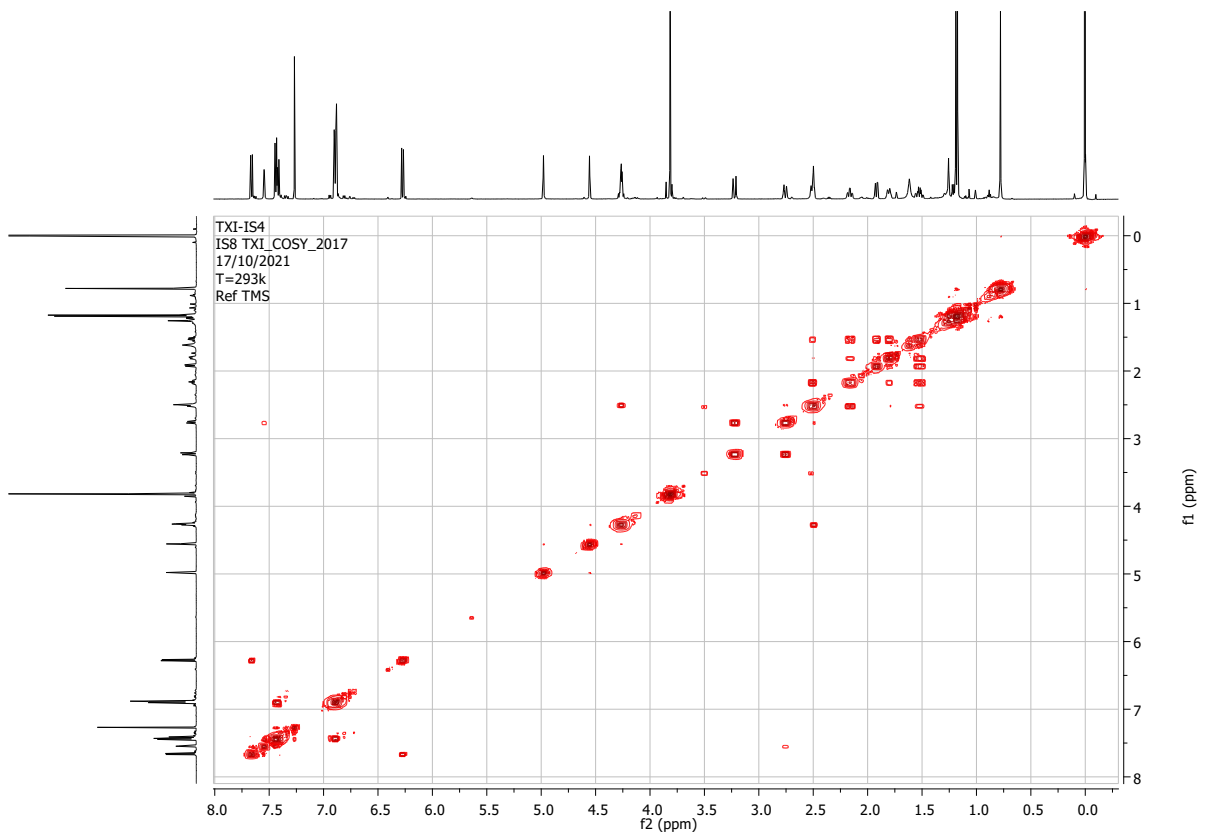

**COSY spectrum of compound 3h**

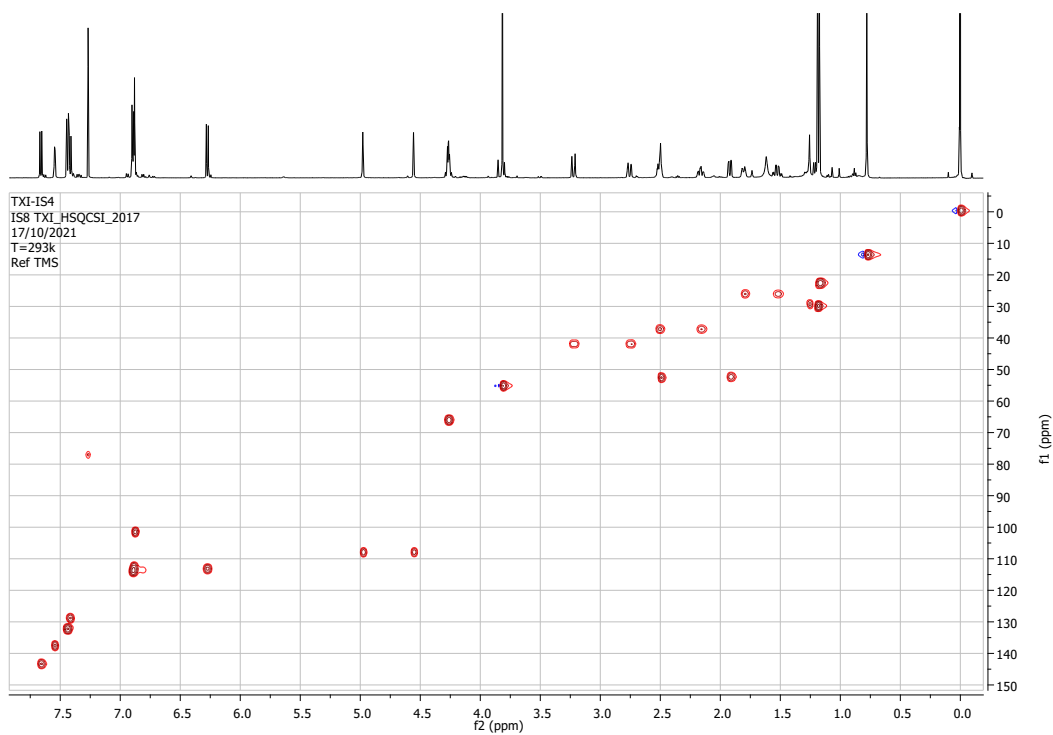

HSQC spectrum of compound 3h

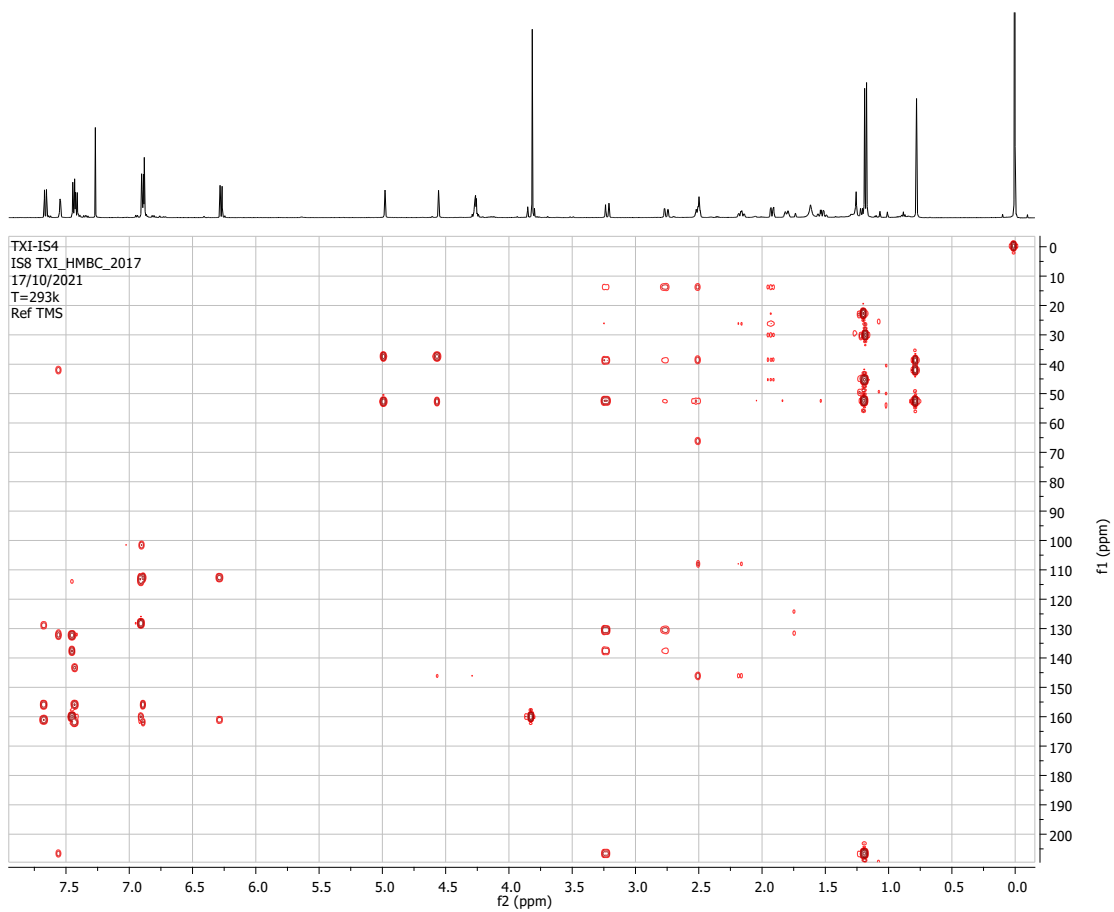

### HMBC spectrum of compound 3h

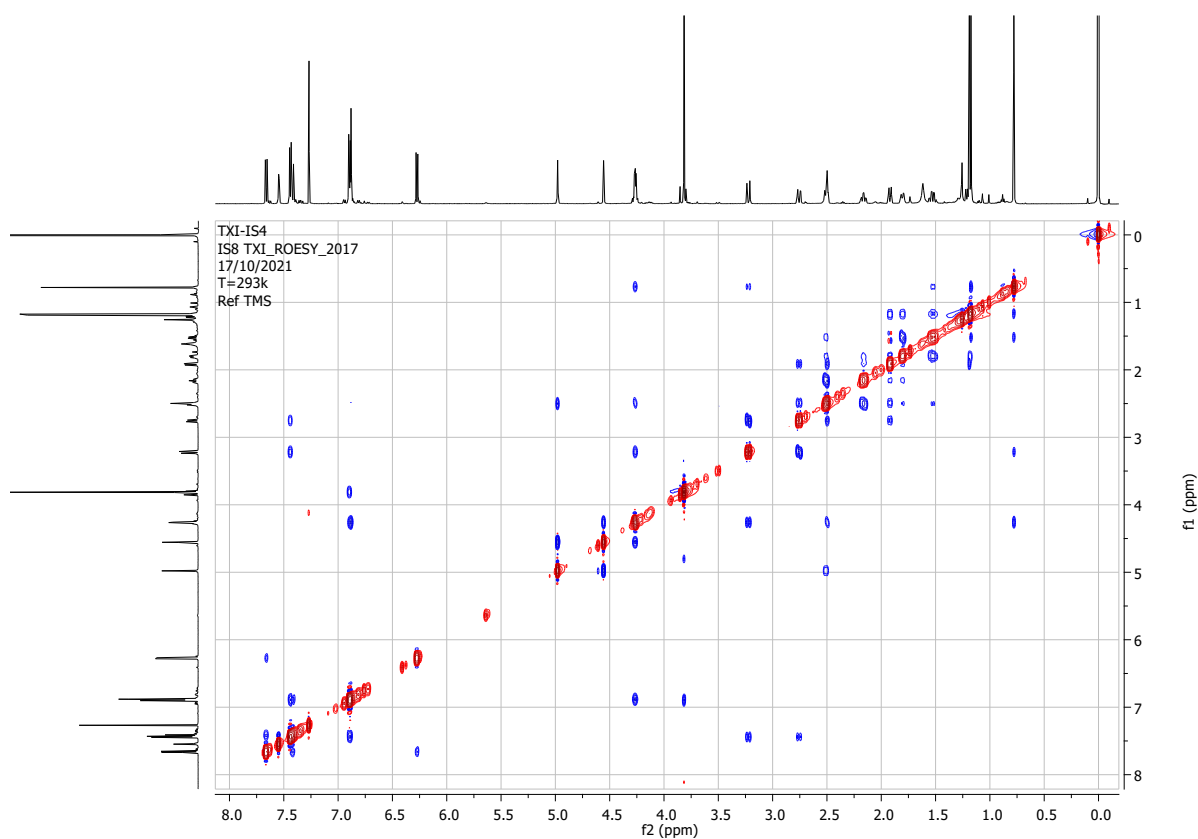

### ROESY spectrum of compound 3h

IS4 #110 RT: 1.48 AV: 1 SM: 7G NL: 1.72E7  
T: FTMS + p ESI Full ms [120.00-2000.00]

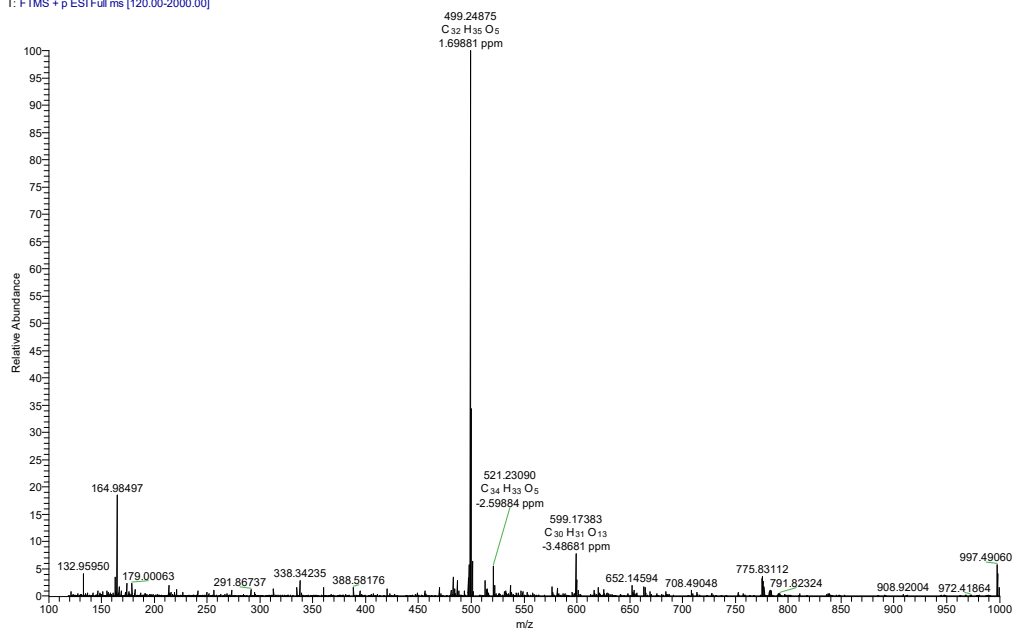

### ESI-HRMS spectrum of compound 3h

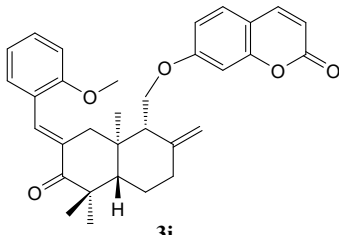

**3i**

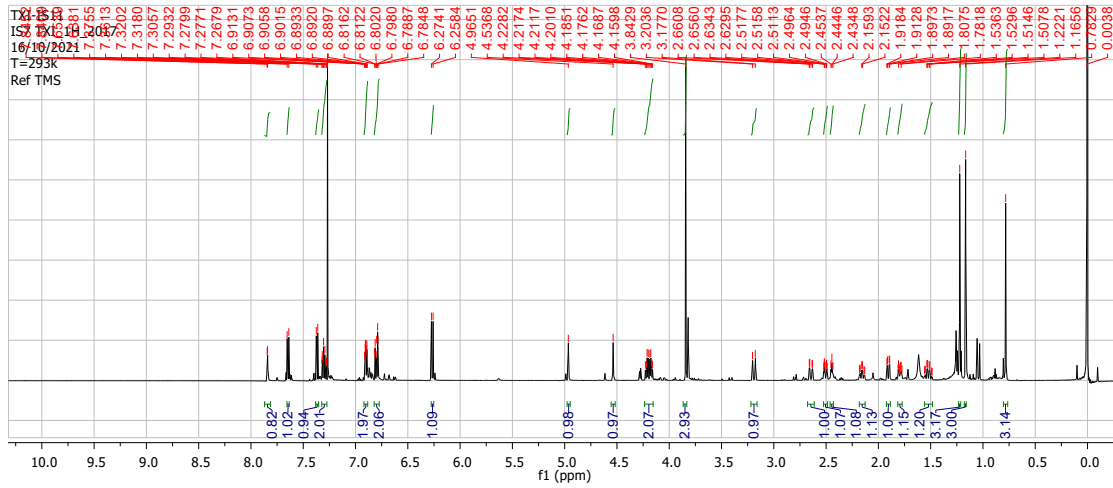

<sup>1</sup>H NMR spectrum (600 MHz, CDCl<sub>3</sub>) of compound **3i**

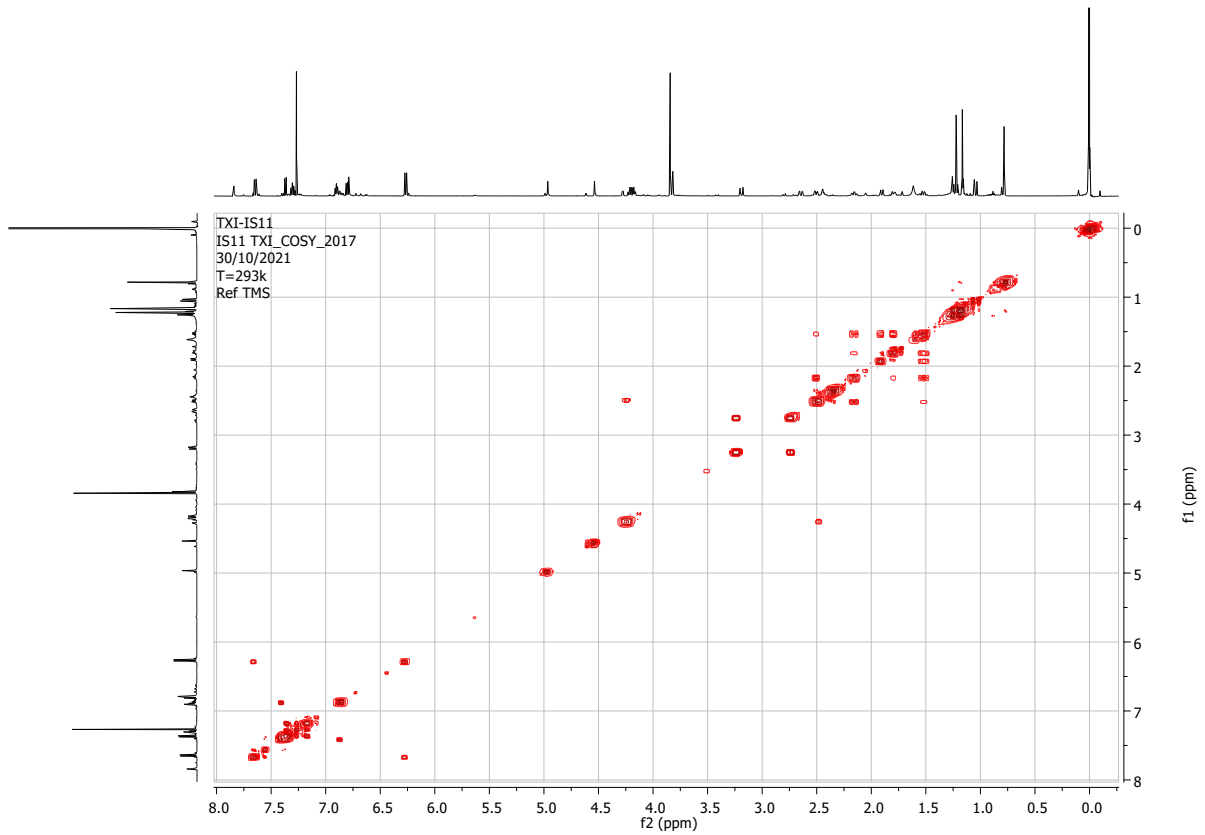

COSY spectrum of compound **3i**

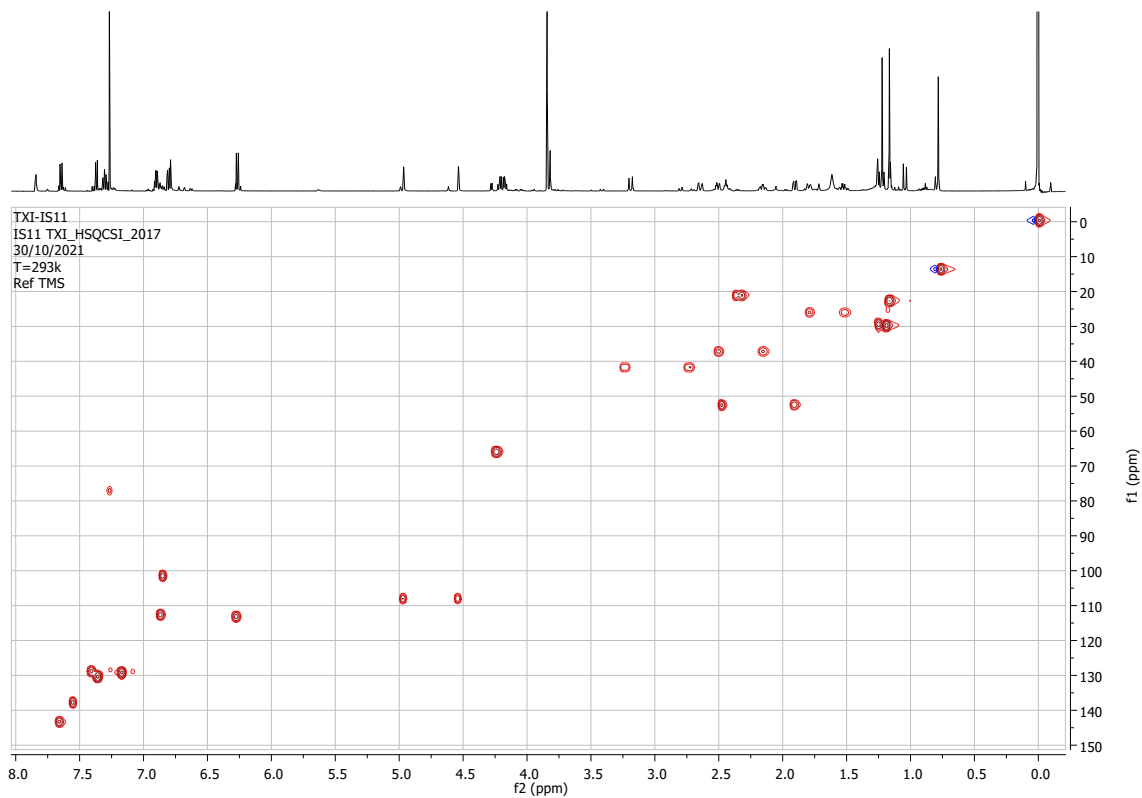

**HSQC spectrum of compound 3i**

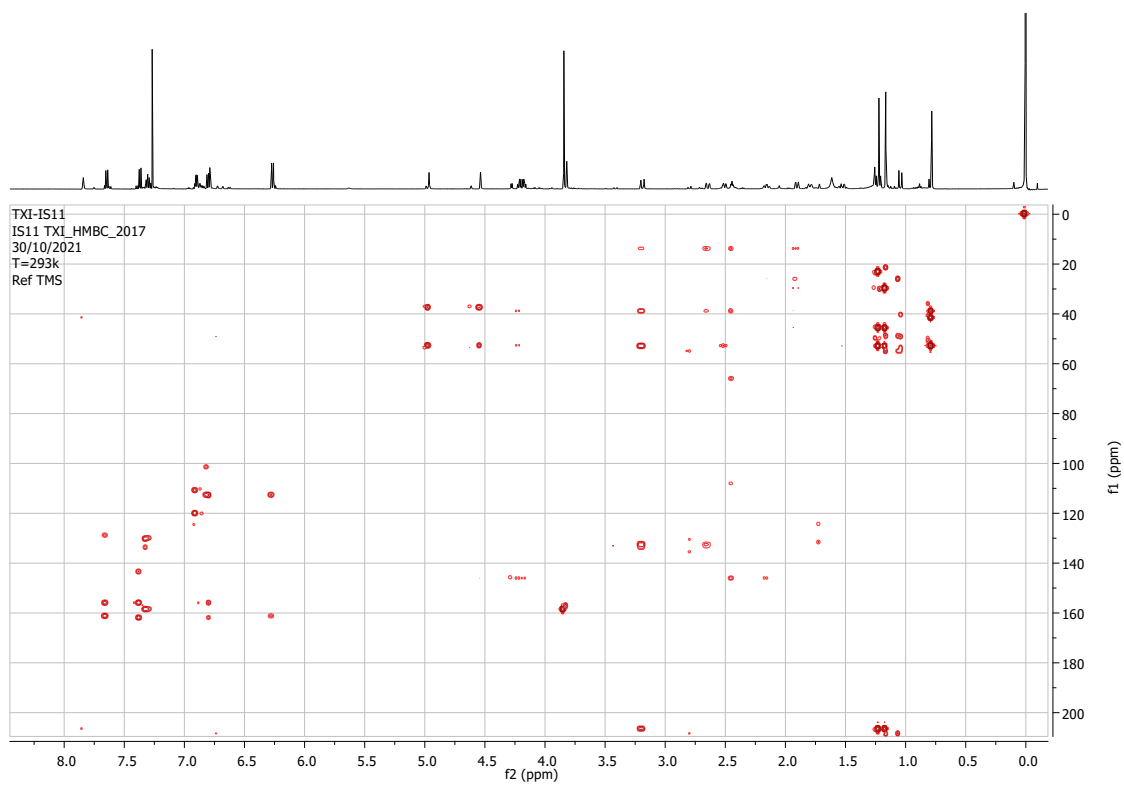

**HMBC spectrum of compound 3i**

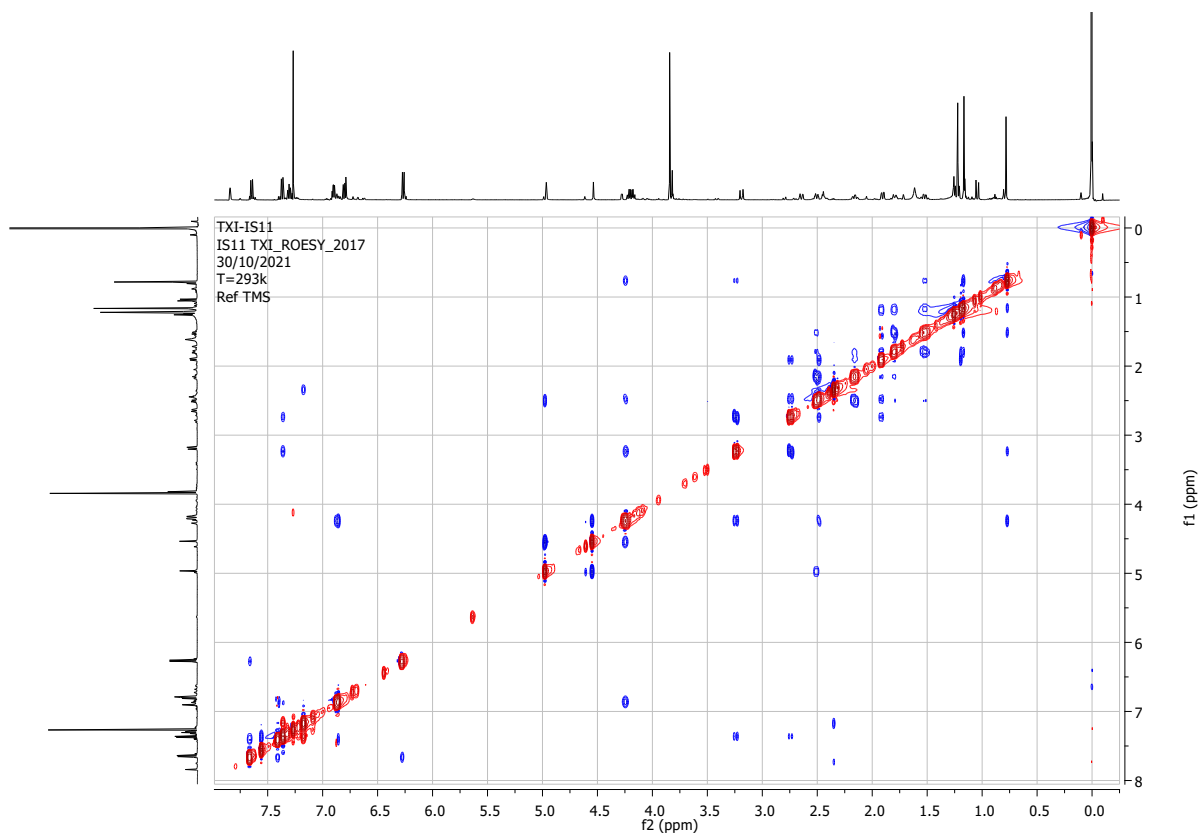

**ROESY spectrum of compound 3i**

IS11 #54 RT: 0.55 AV: 1 SM: 7G NL: 4.16E6  
T: FTMS + p ESI Full ms [120.00-2000.00]

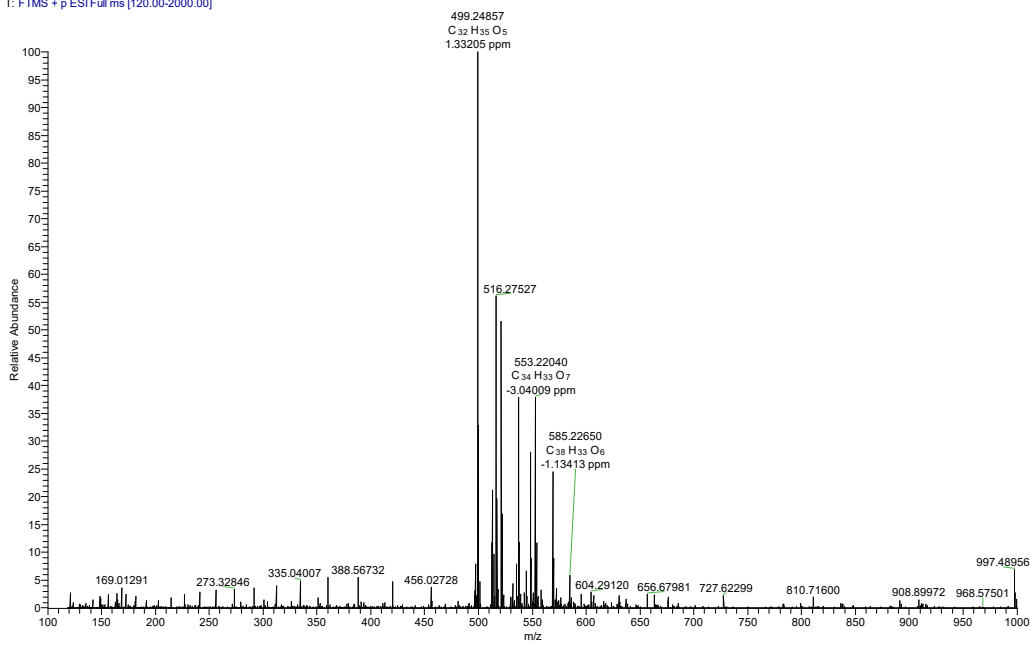

**ESI-HRMS spectrum of compound 3i**

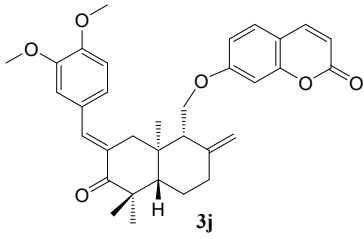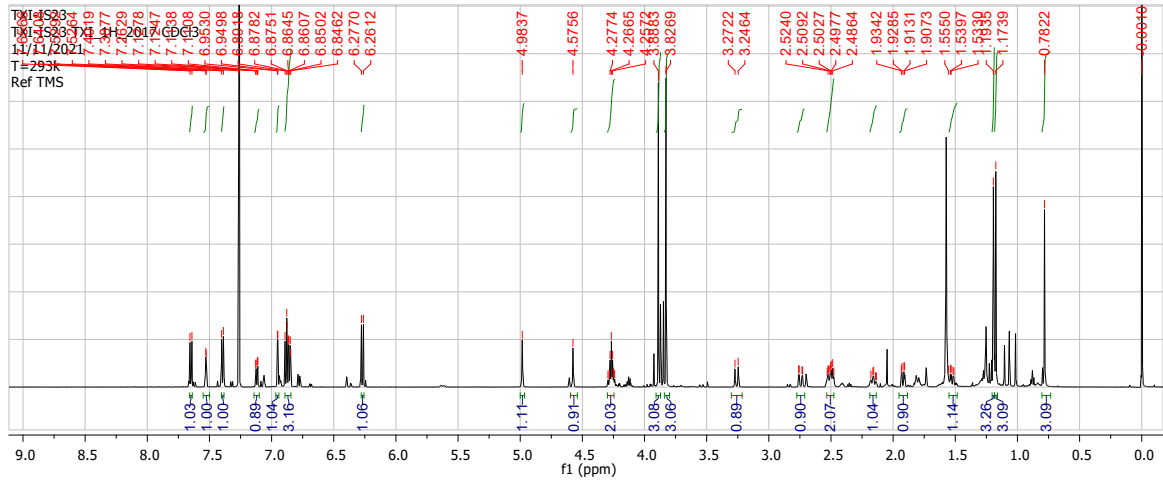

<sup>1</sup>H NMR spectrum (600 MHz, CDCl<sub>3</sub>) of compound 3j

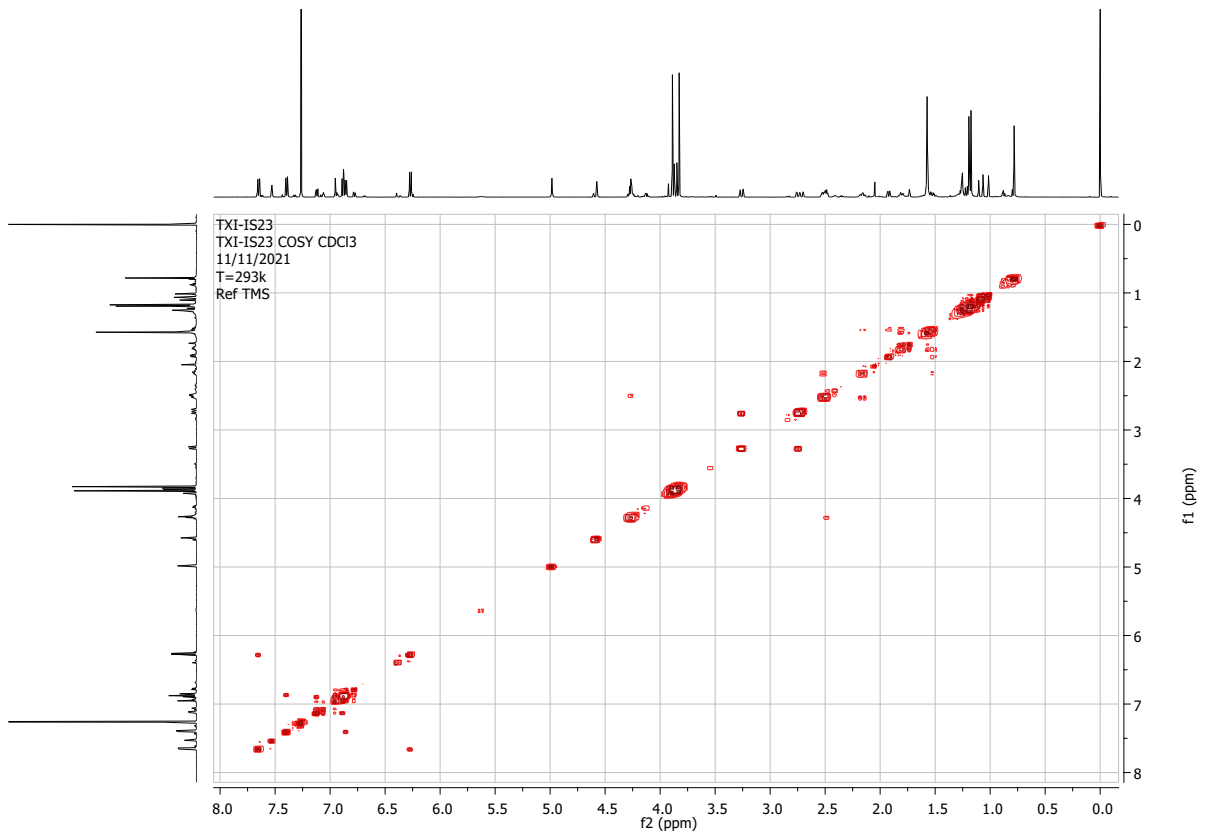

COSY spectrum of compound 3j



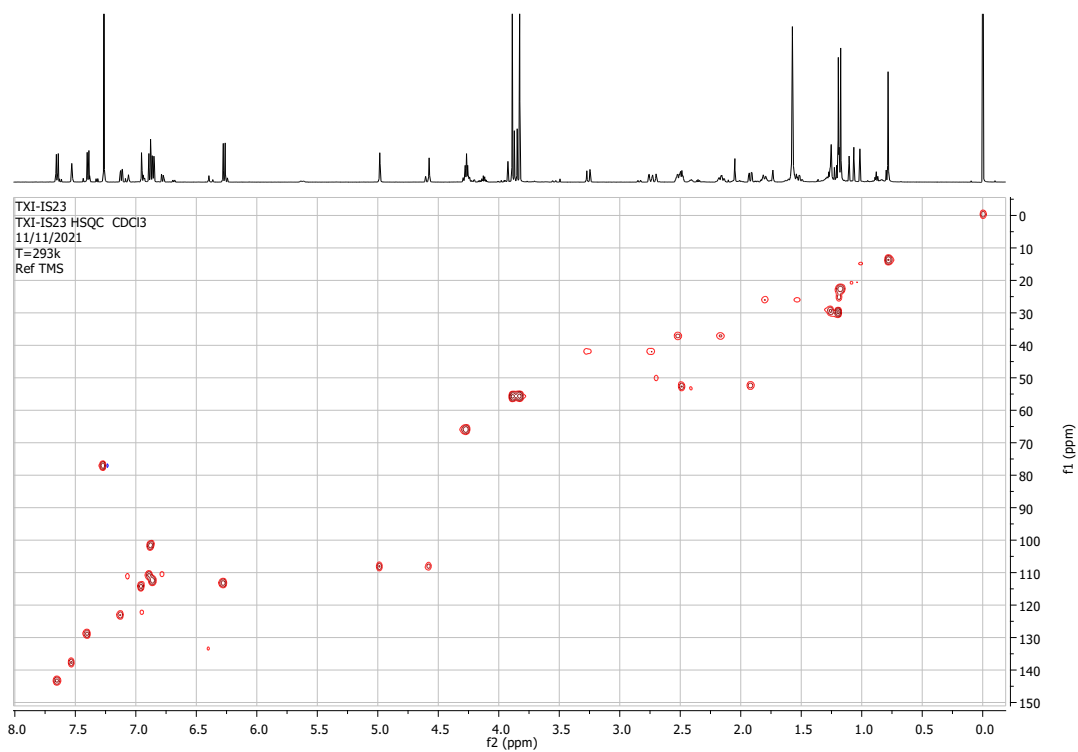

HSQC spectrum of compound 3j

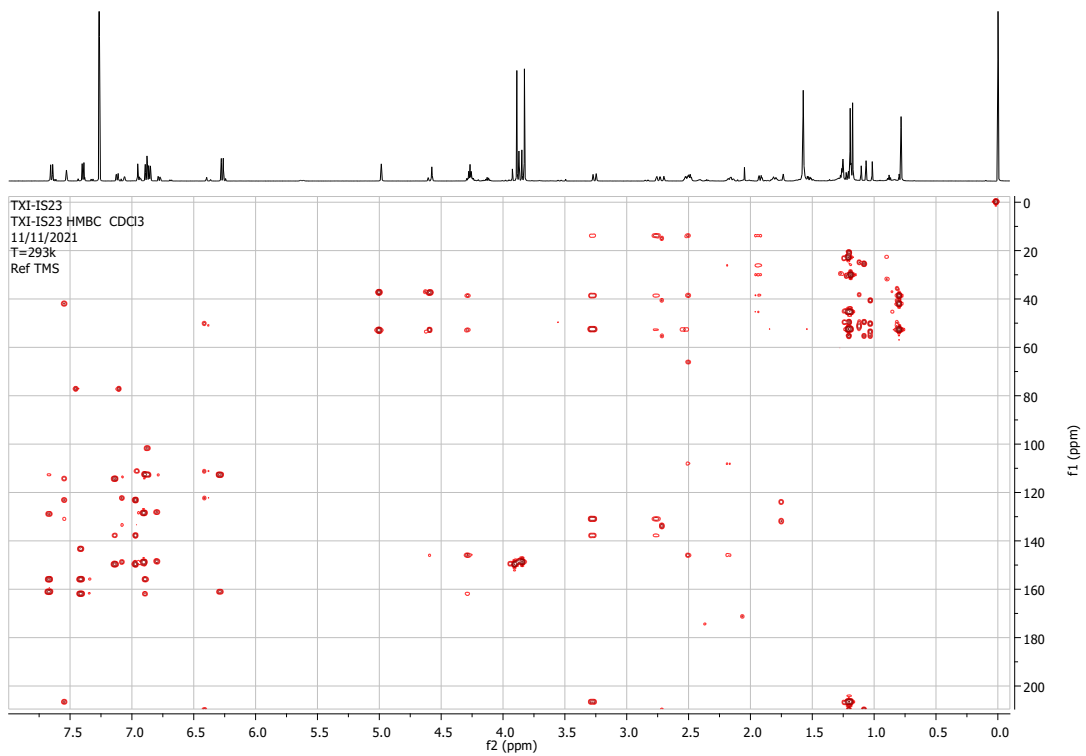

HMBC spectrum of compound 3j

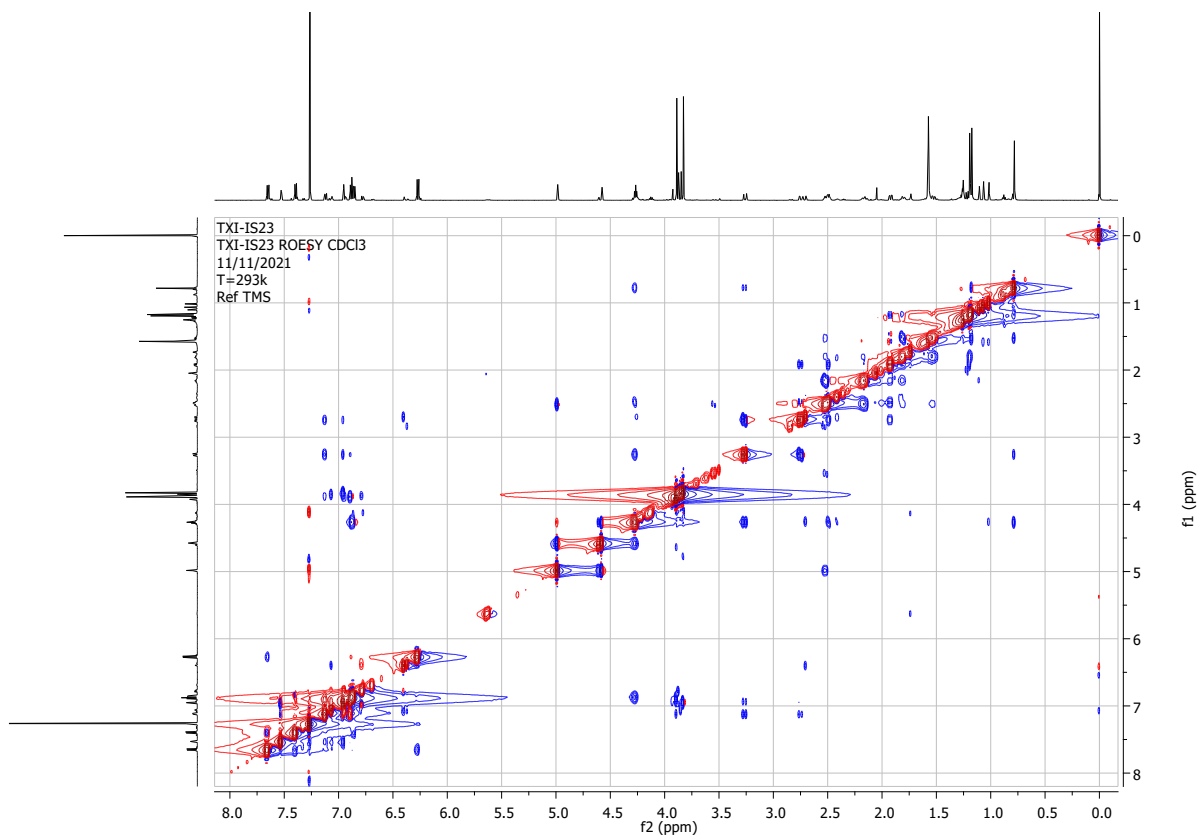

ROESY spectrum of compound 3j

IS23 #3 RT: 0.05 AV: 1 SM: 7G NL: 5.45E7  
T: FTMS + p ESI Full ms [120.00-2000.00]

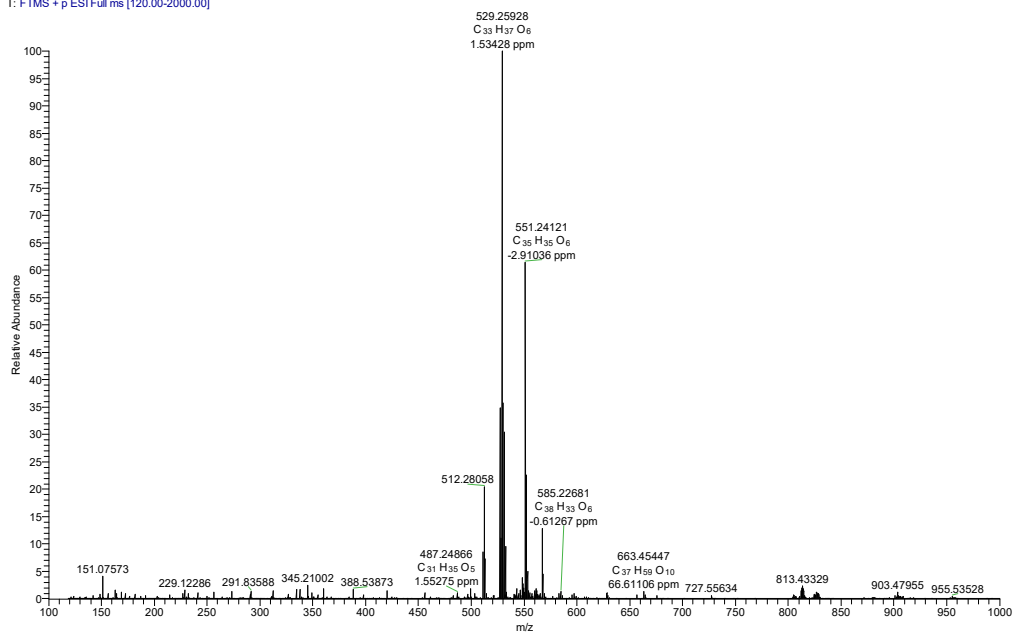

ESI-HRMS spectrum of compound 3j

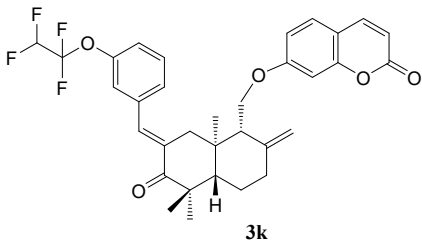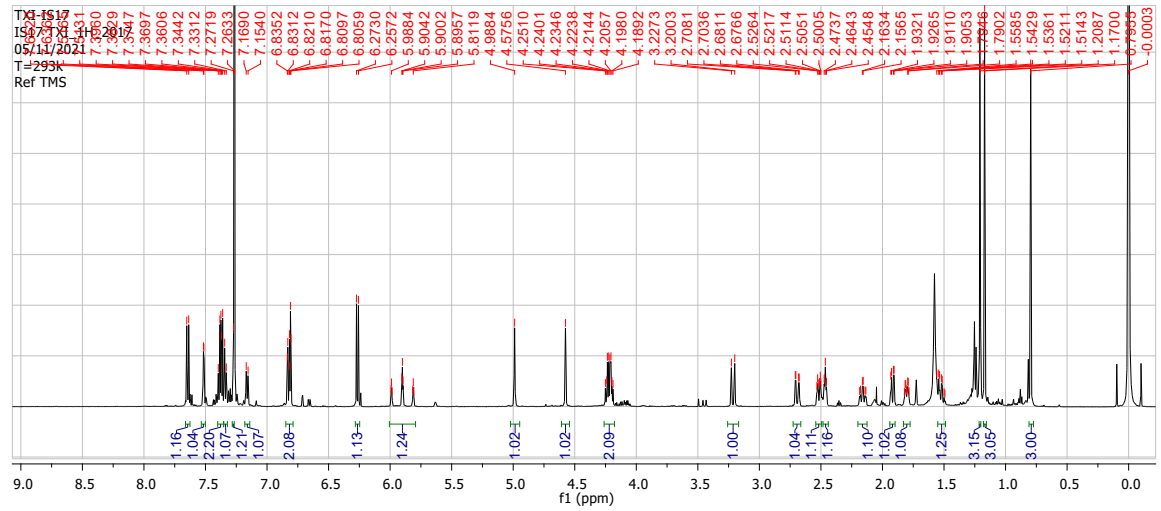

**<sup>1</sup>H NMR spectrum (600 MHz, CDCl<sub>3</sub>) of compound 3k**

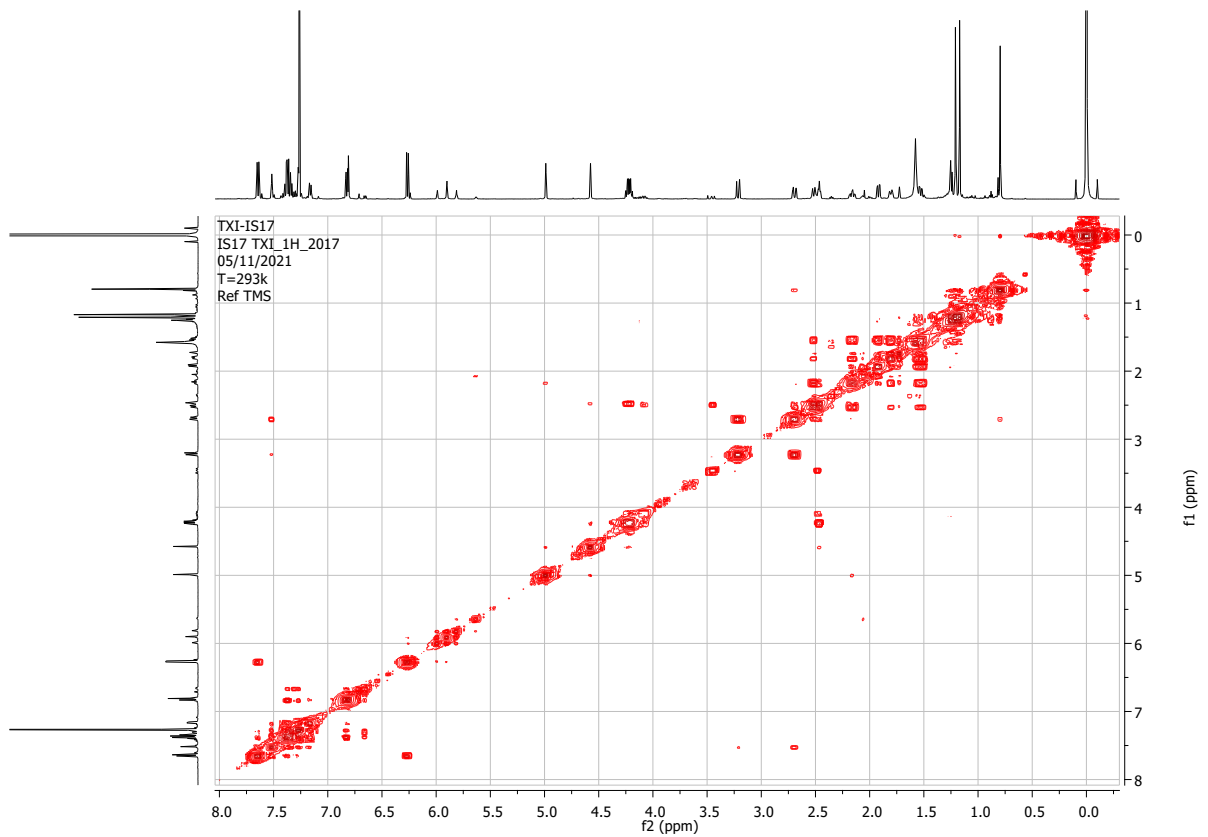

**COSY spectrum of compound 3k**

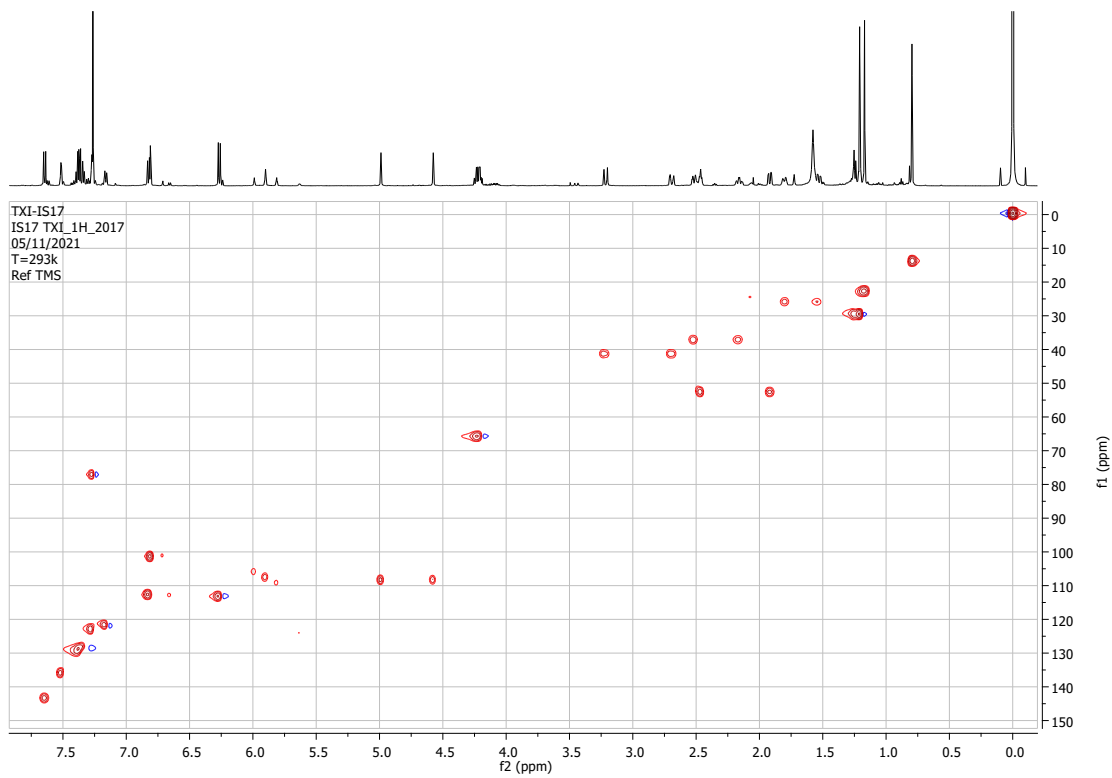

HSQC spectrum of compound 3k

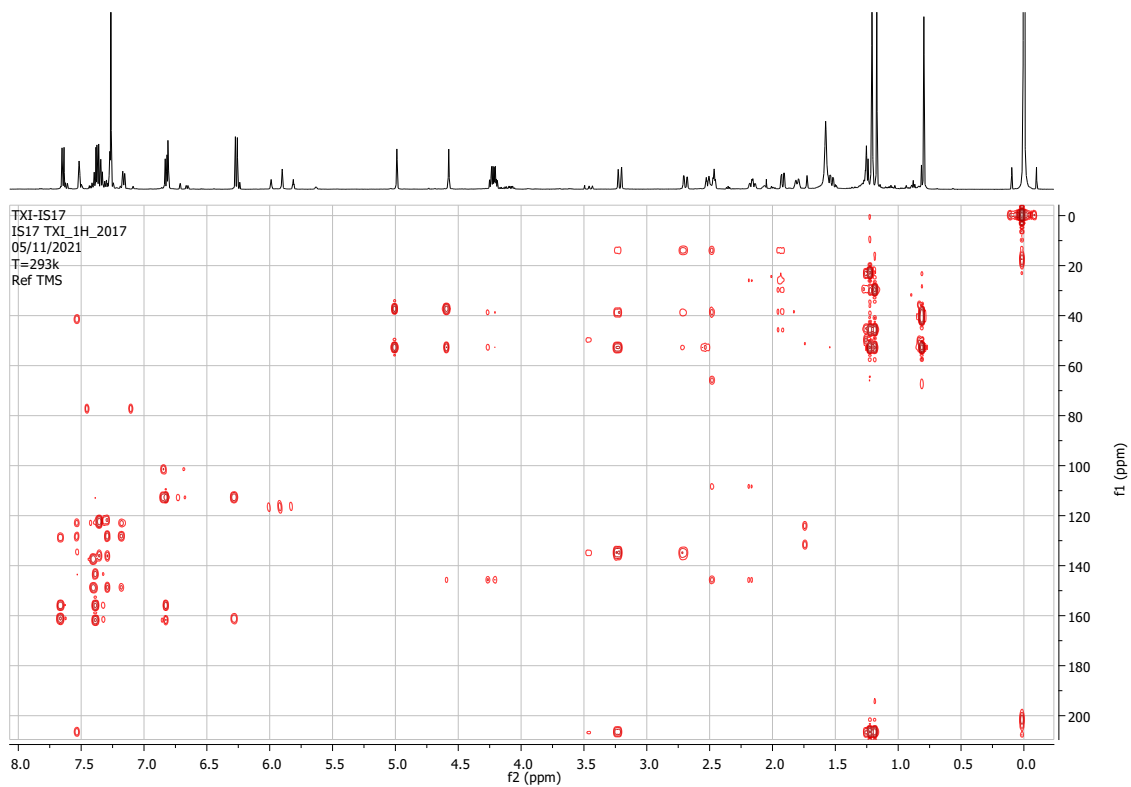

HMBC spectrum of compound 3k

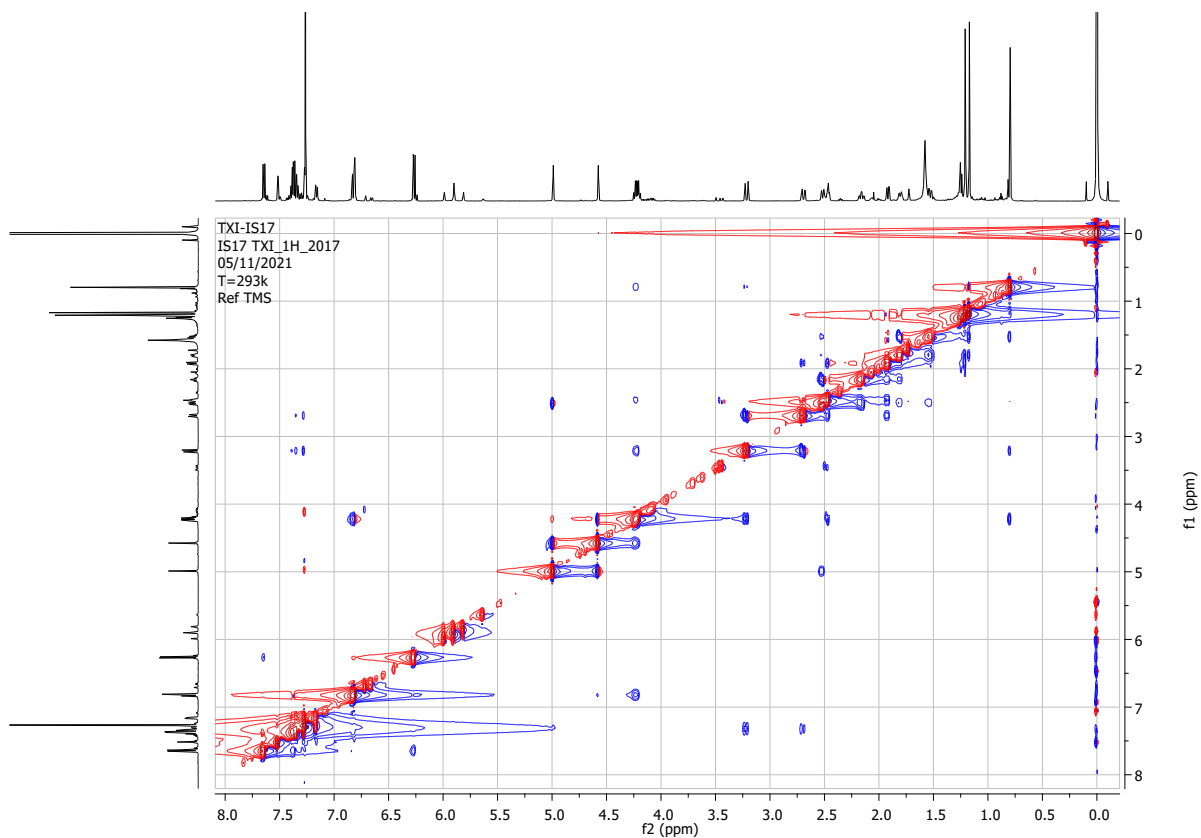

ROESY spectrum of compound 3k

IS17 #480 RT: 1.24 AV: 1 SB: 6 1.97-2.09, 0.02-0.09 SM: 7G NL: 3.29E6  
T: FTMS + p ESI Full ms [120.00-2000.00]

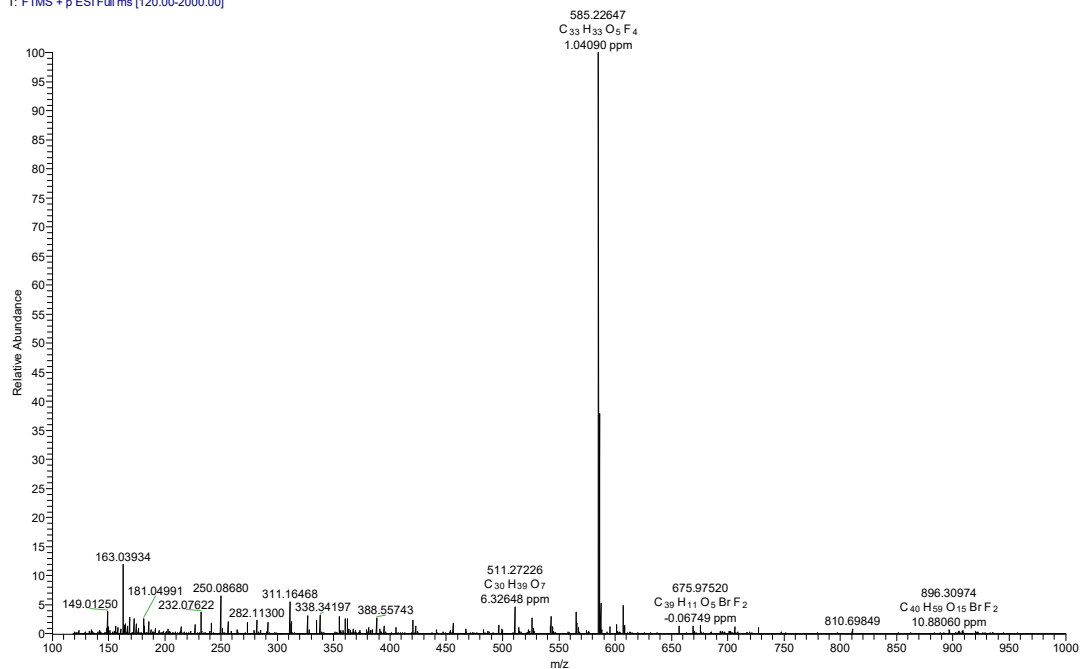

ESI-HRMS spectrum of compound 3k

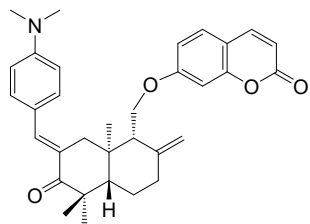

31

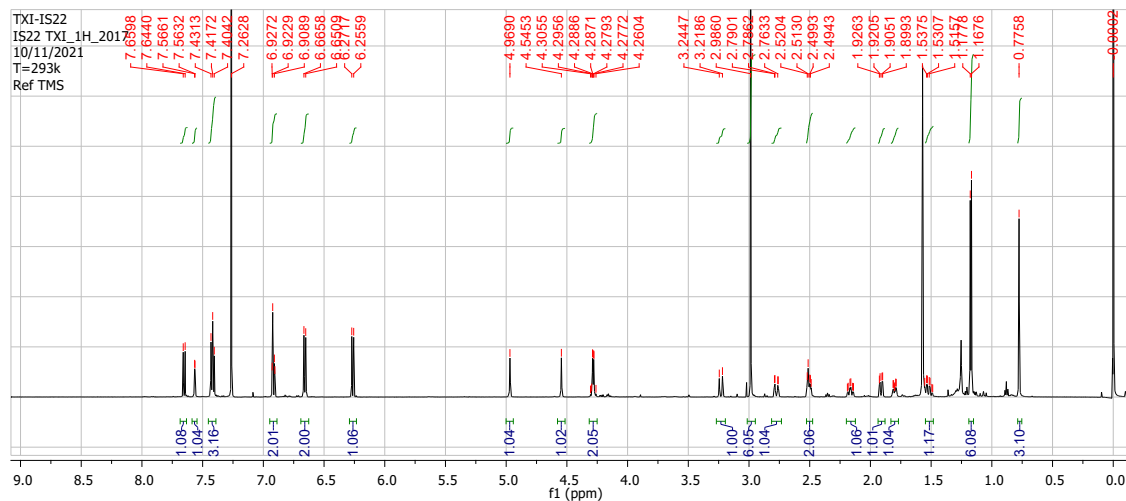

<sup>1</sup>H NMR (600 MHz, CDCl<sub>3</sub>) of compound 31

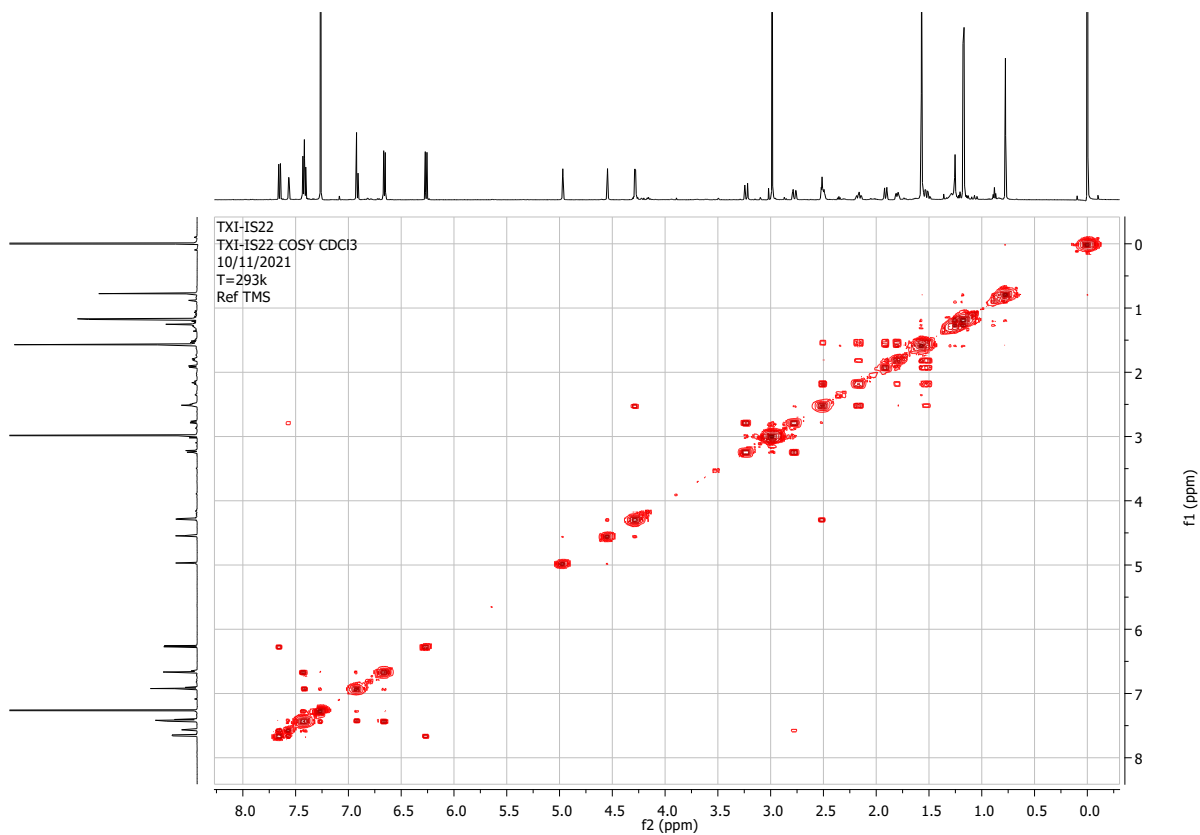

COSY spectrum of compound 31

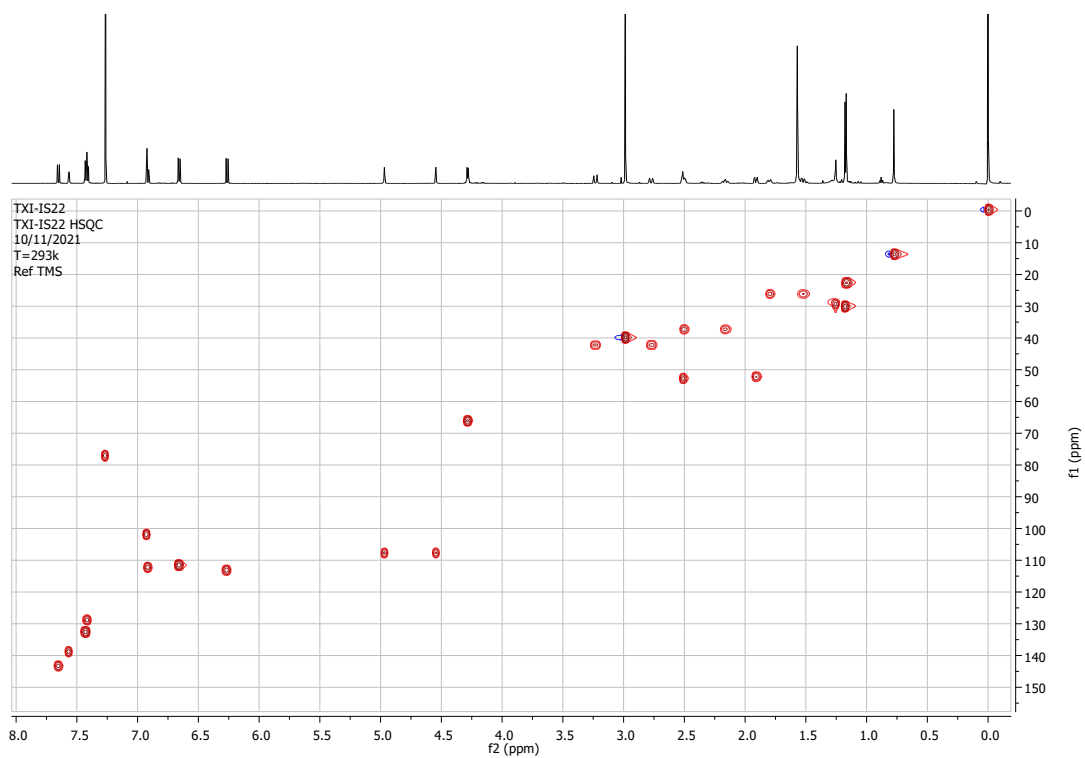

**HSQC spectrum of compound 31**

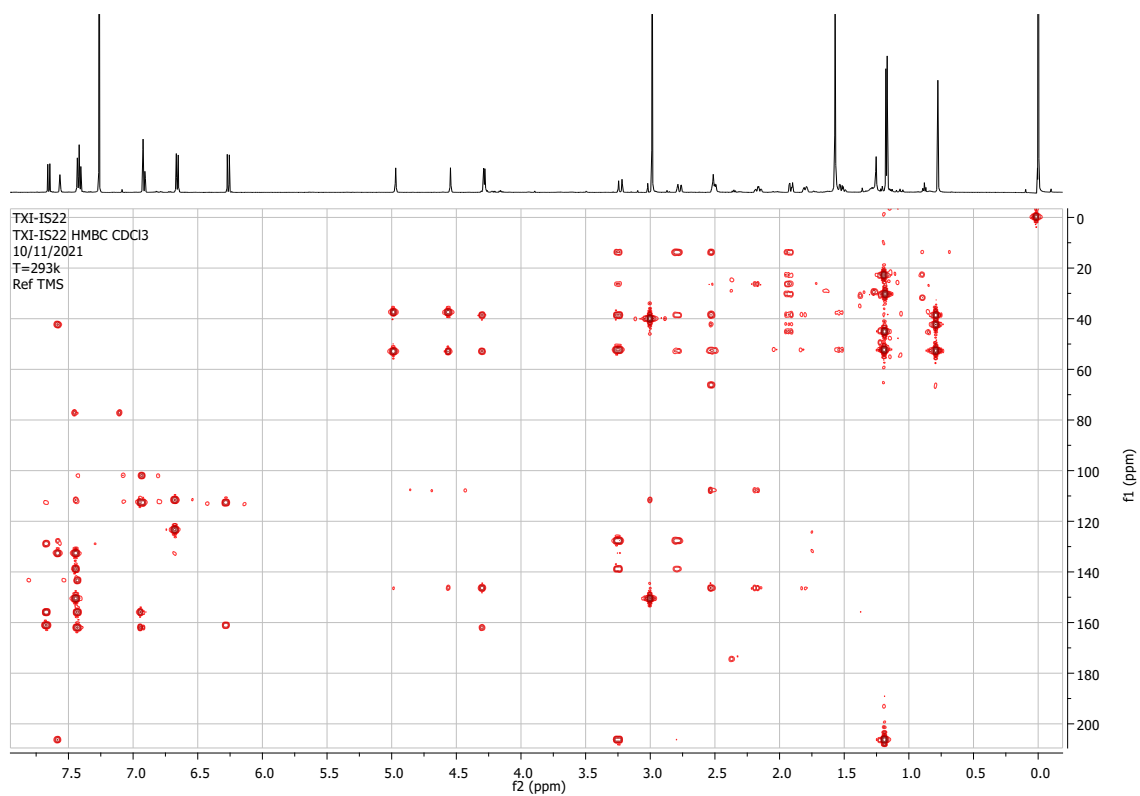

**HMBC spectrum of compound 31**

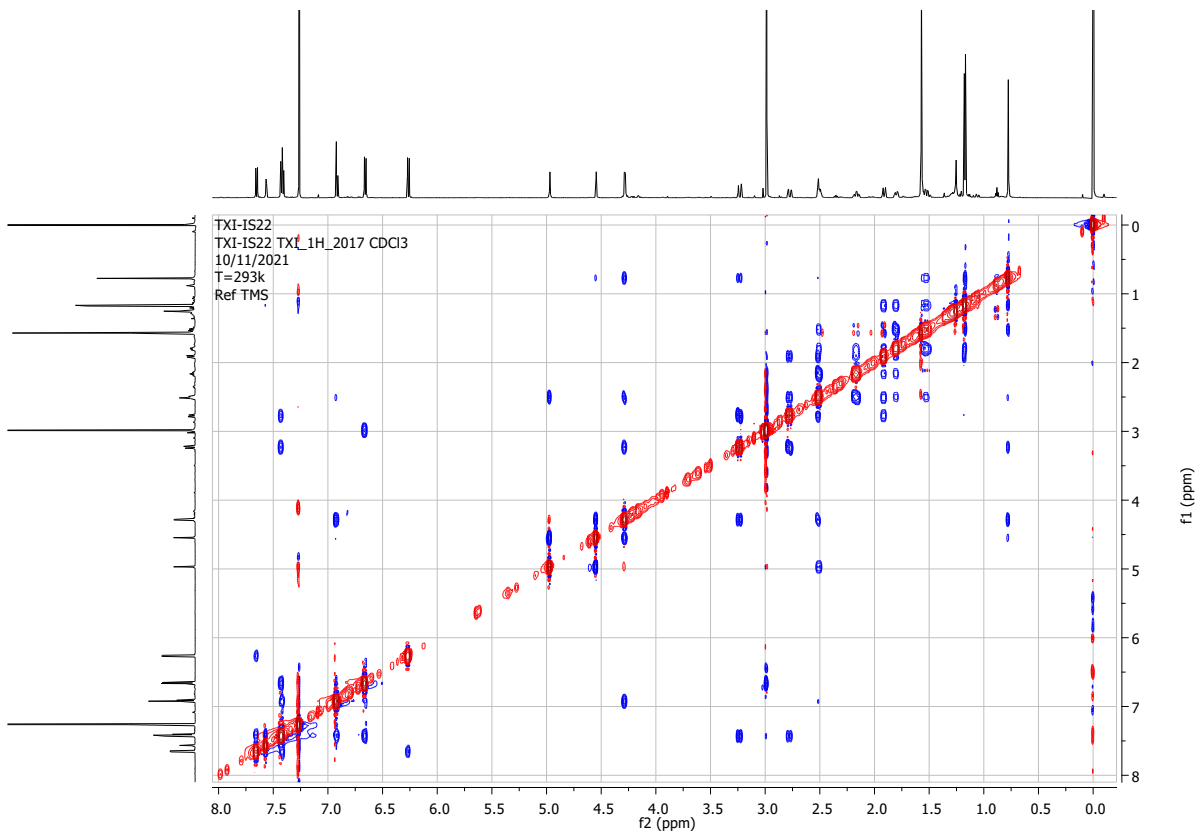

**ROESY spectrum of compound 31**

IS22 #256 RT: 3.13 AV: 1 SM: 7G NL: 1.17E7  
T: FTMS + p ESI Full ms [120.00-2000.00]

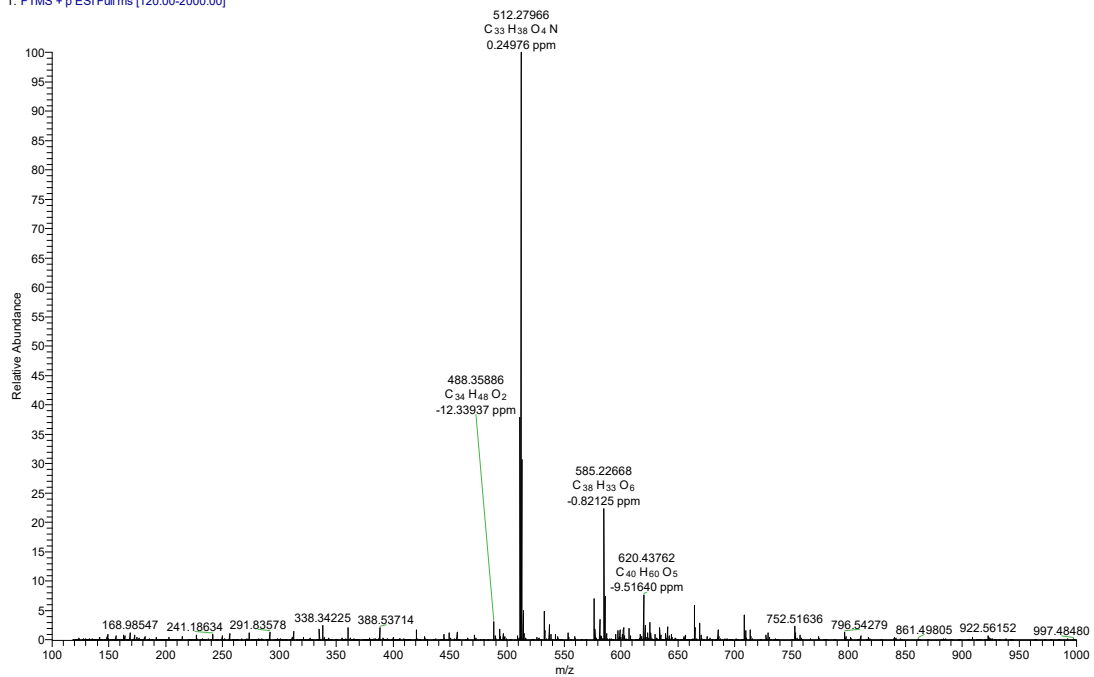

**ESI-HRMS spectrum of compound 31**



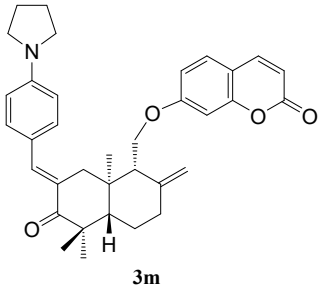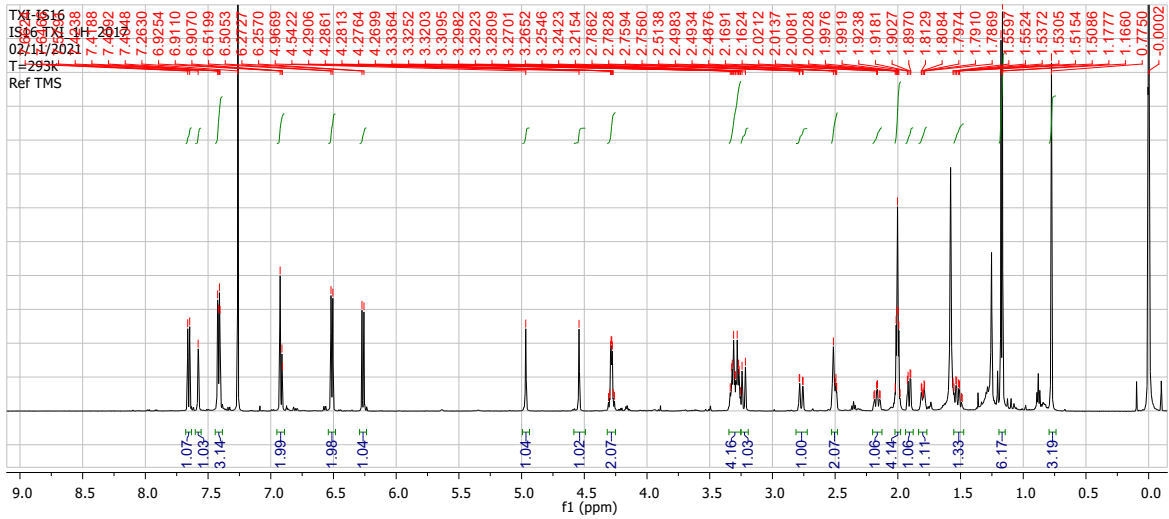

**<sup>1</sup>H NMR spectrum (600 MHz, CDCl<sub>3</sub>) of compound 3m**

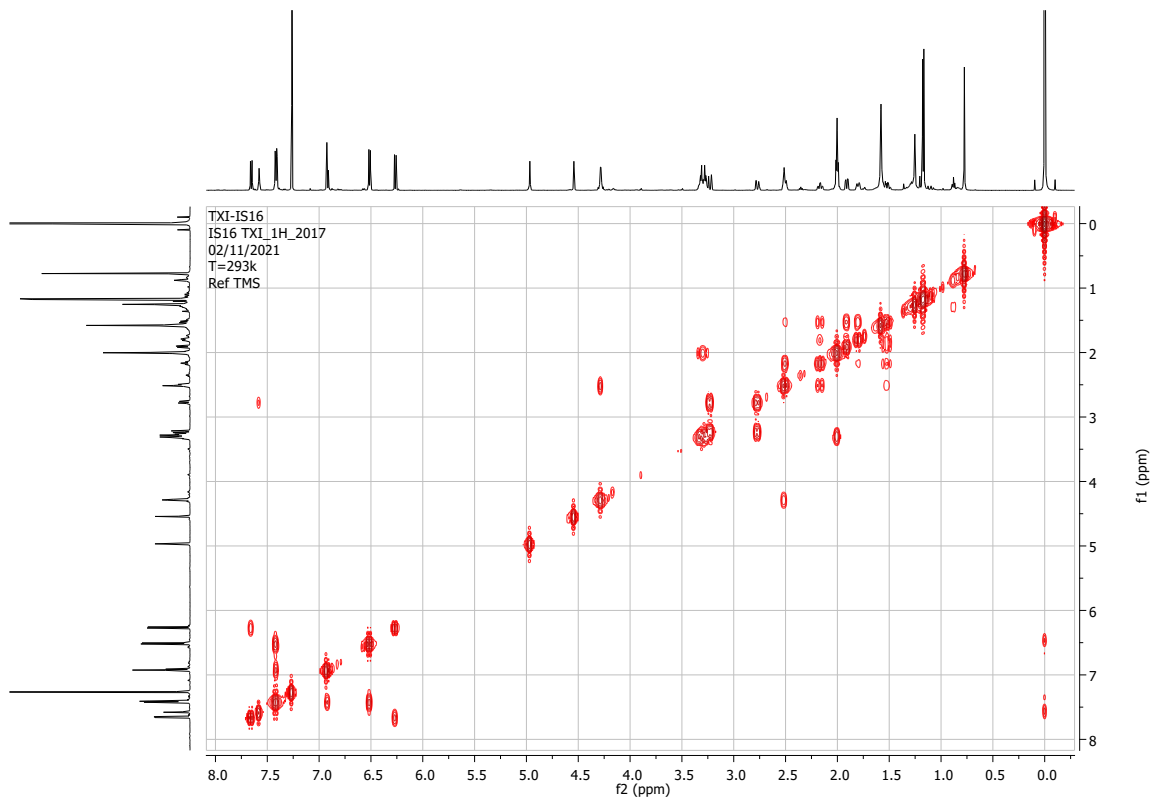

**COSY spectrum of compound 3m**

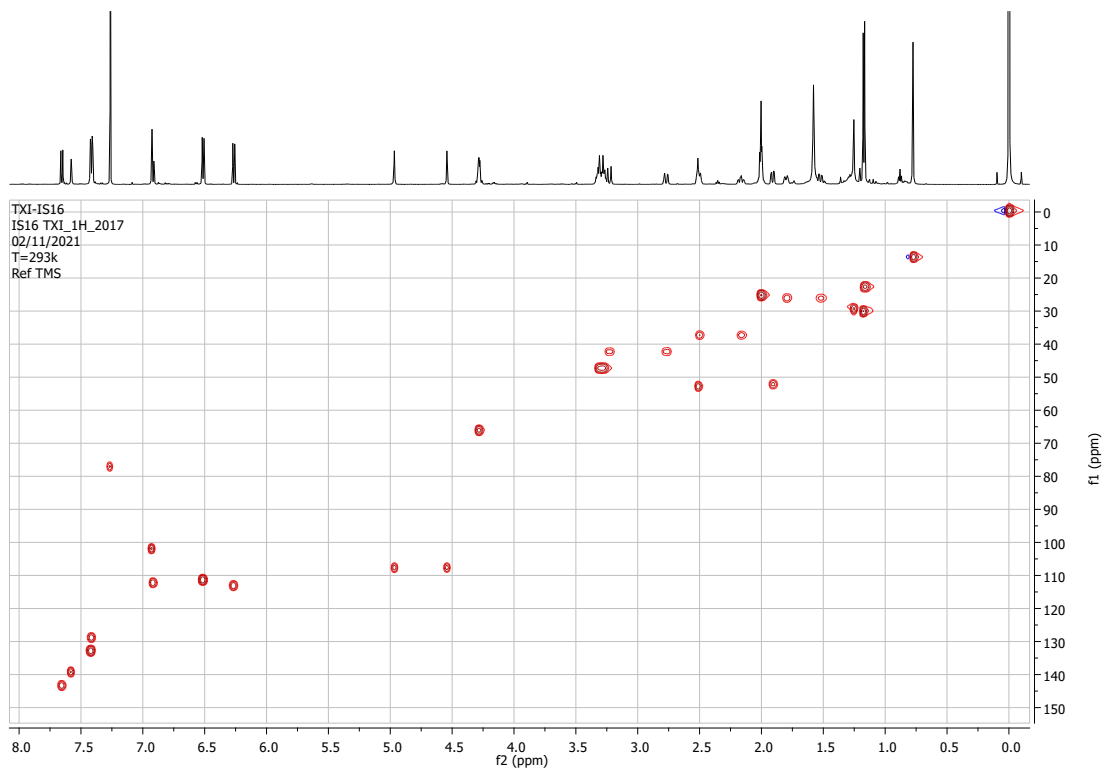

HSQC spectrum of compound 3m

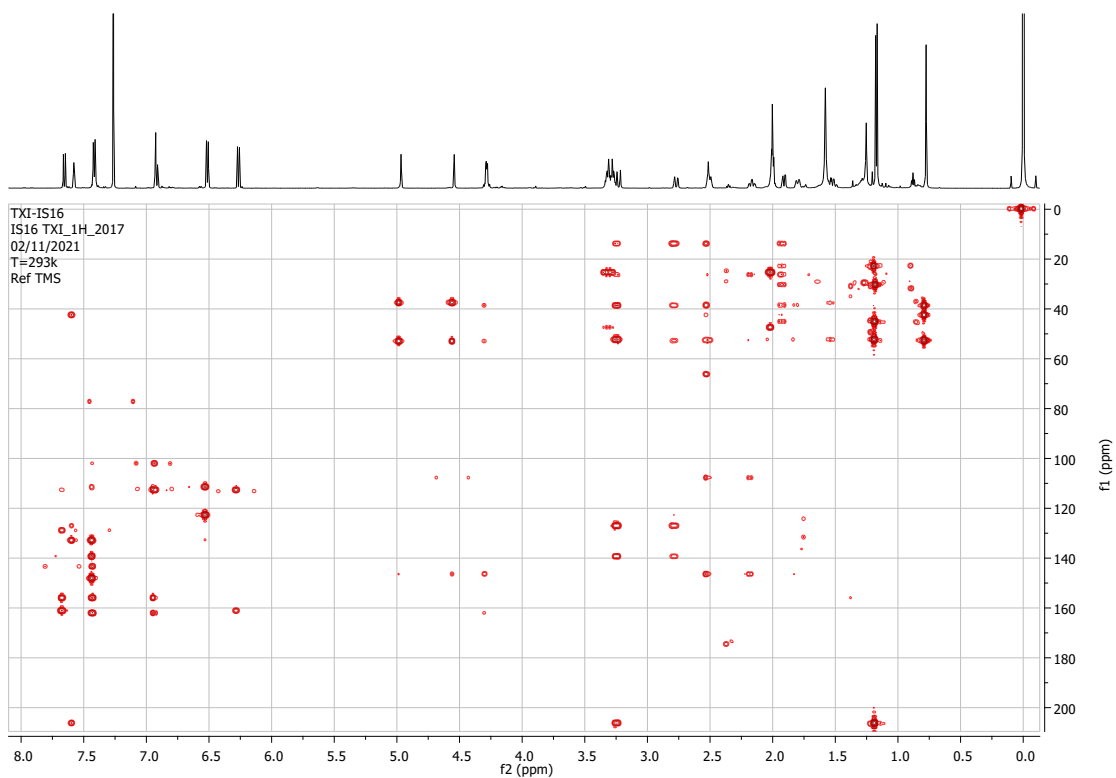

HMBC spectrum of compound 3m

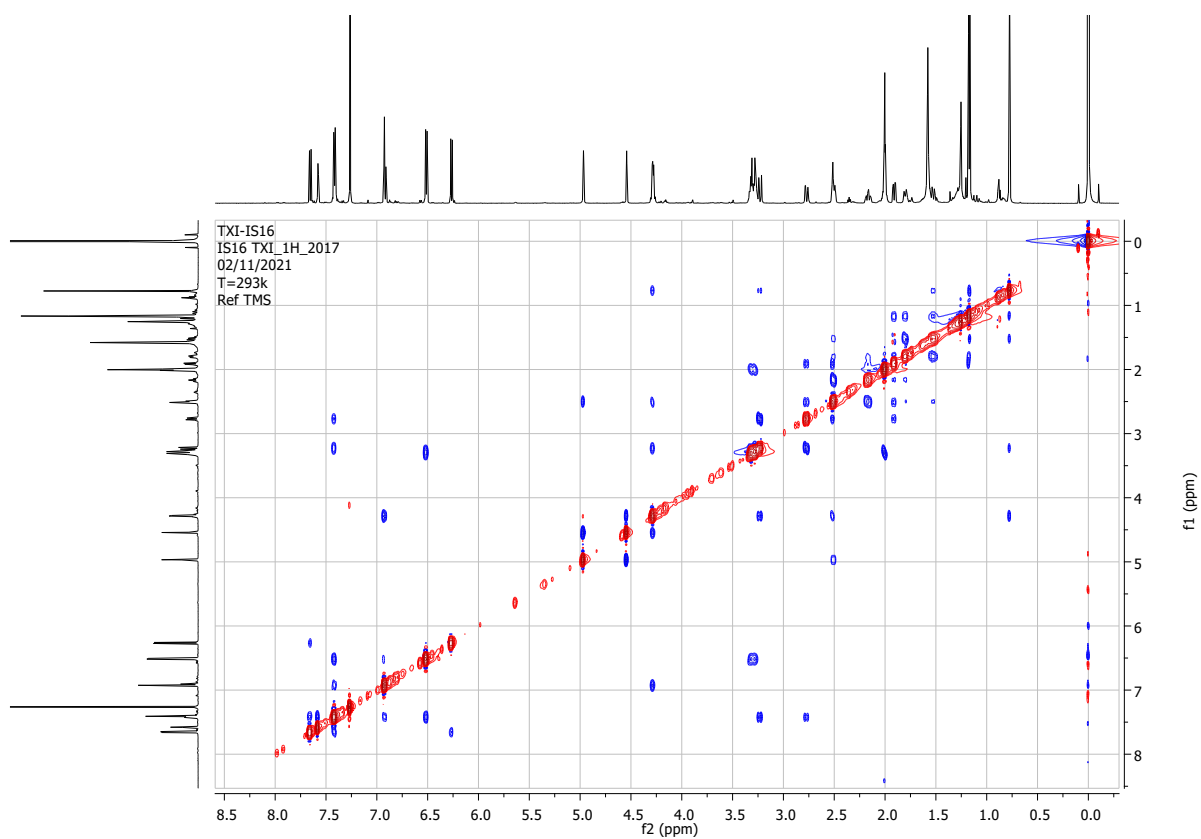

ROESY spectrum of compound 3m

**S3: Active site docking/blind docking poses of all compounds:**

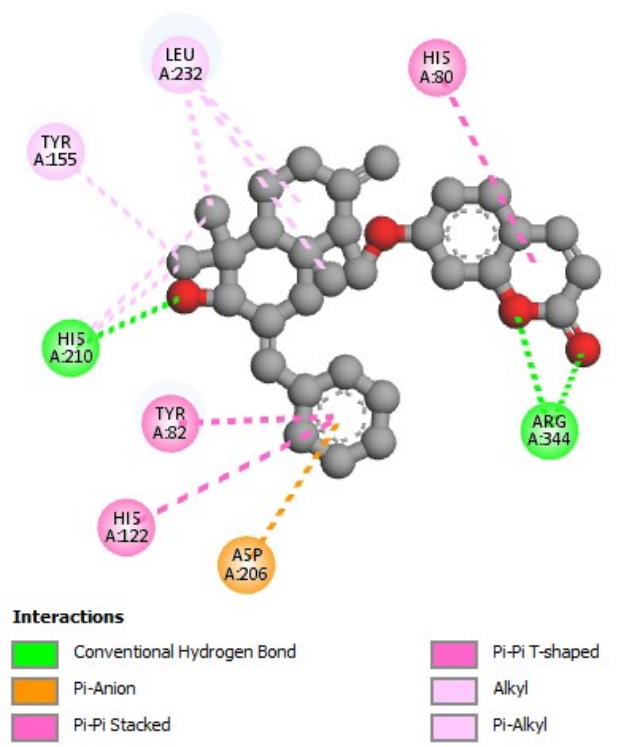

## 2D profile of compound 3a in the active site of $\alpha$ -amylase enzyme

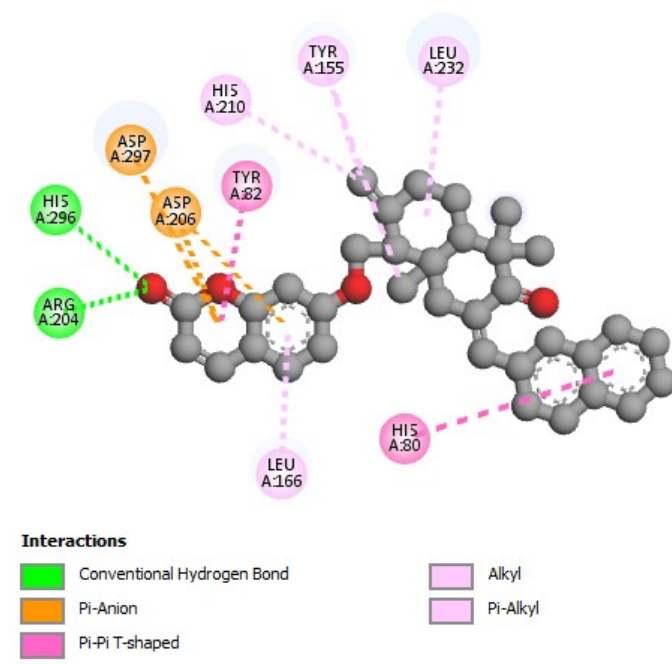

## 2D profile of compound 3b in the active site of $\alpha$ -amylase enzyme

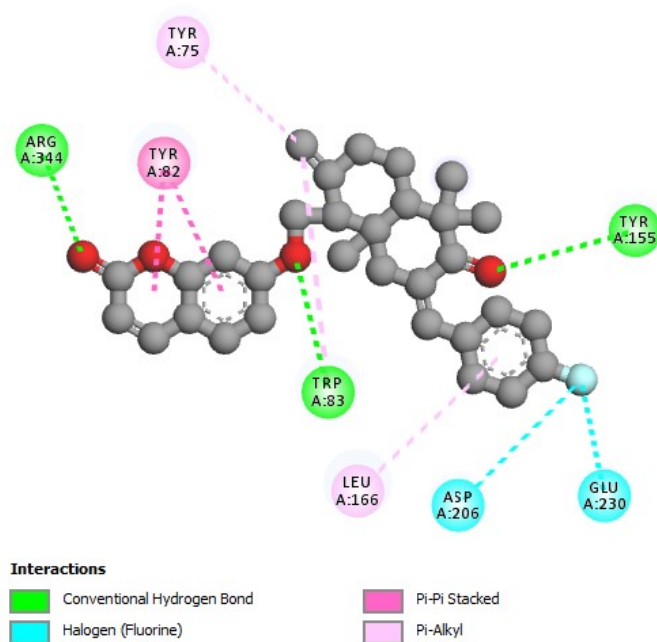

## 2D profile of compound 3c in the active site of $\alpha$ -amylase enzyme

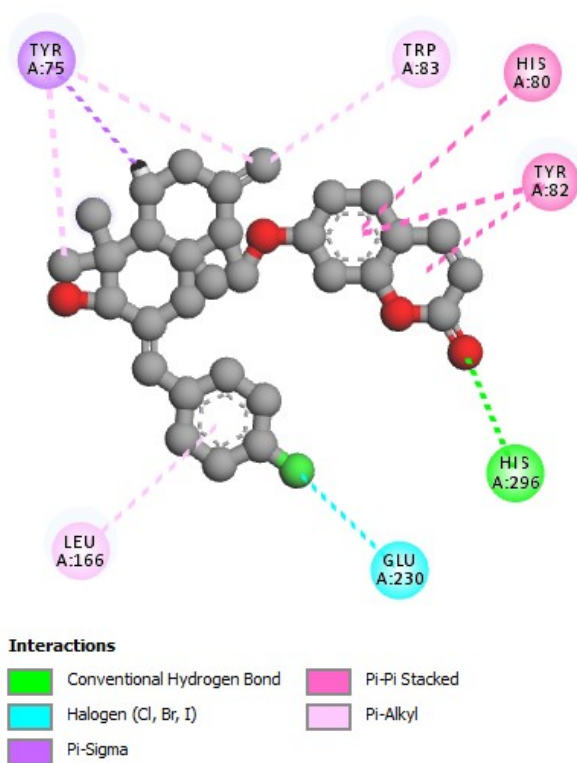

2D profile of compound 3d in the active site of  $\alpha$ -amylase enzyme

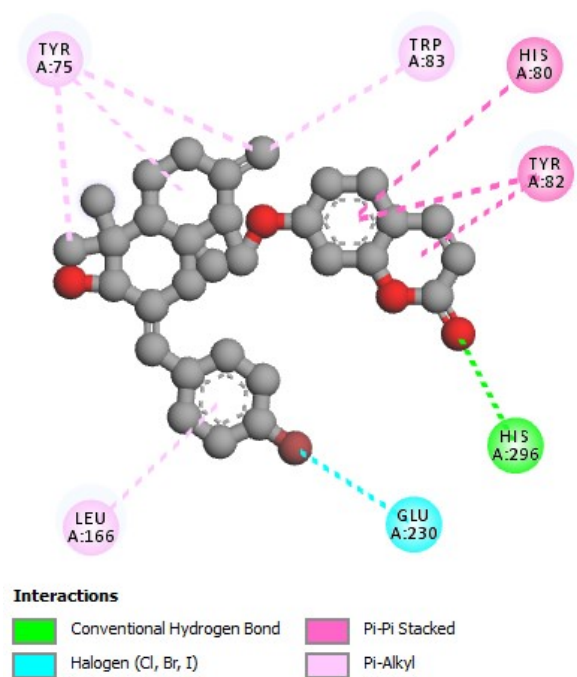

2D profile of compound 3e in the active site of  $\alpha$ -amylase enzyme

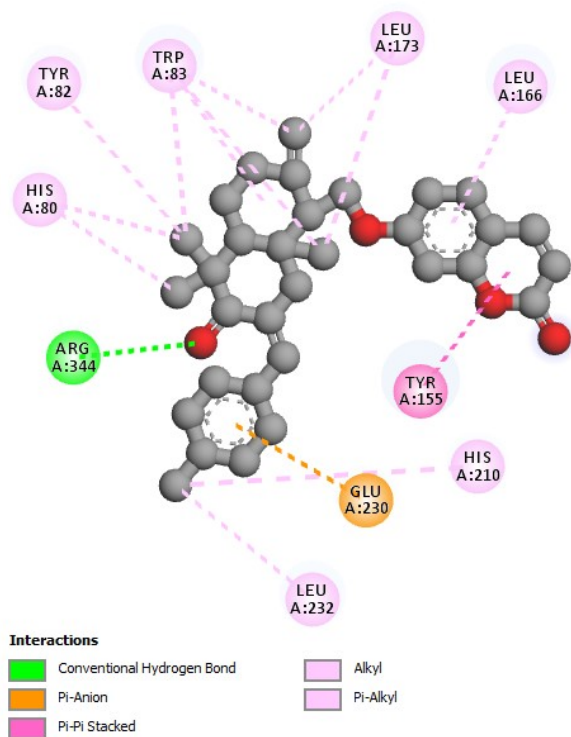

### 2D profile of compound 3f in the active site of $\alpha$ -amylase enzyme

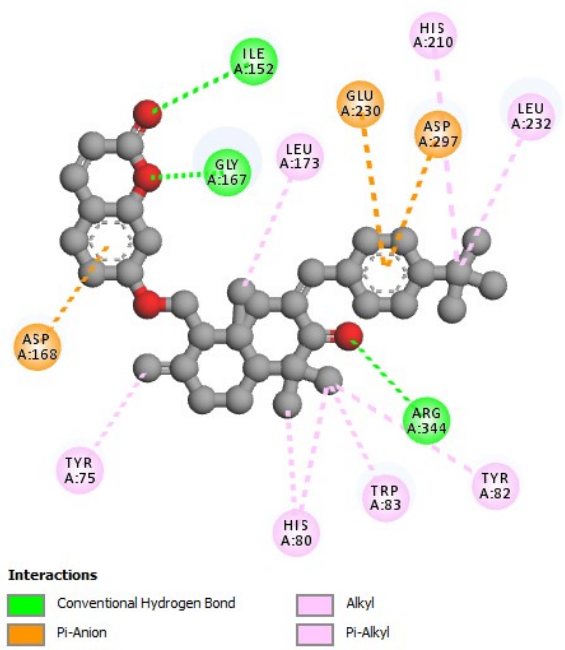

### 2D profile of compound 3g in the active site of $\alpha$ -amylase enzyme

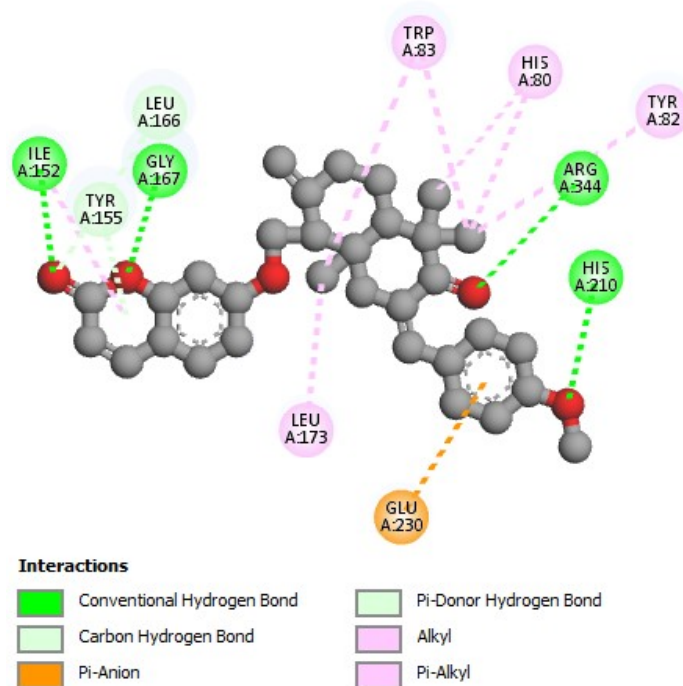

**2D profile of compound 3h in the active site of  $\alpha$ -amylase enzyme**

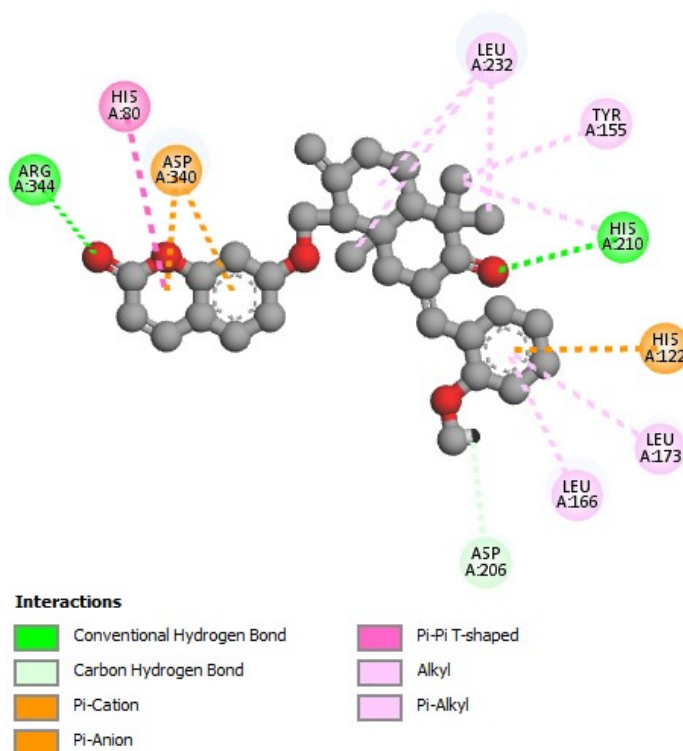

**2D profile of compound 3i in the active site of  $\alpha$ -amylase enzyme**

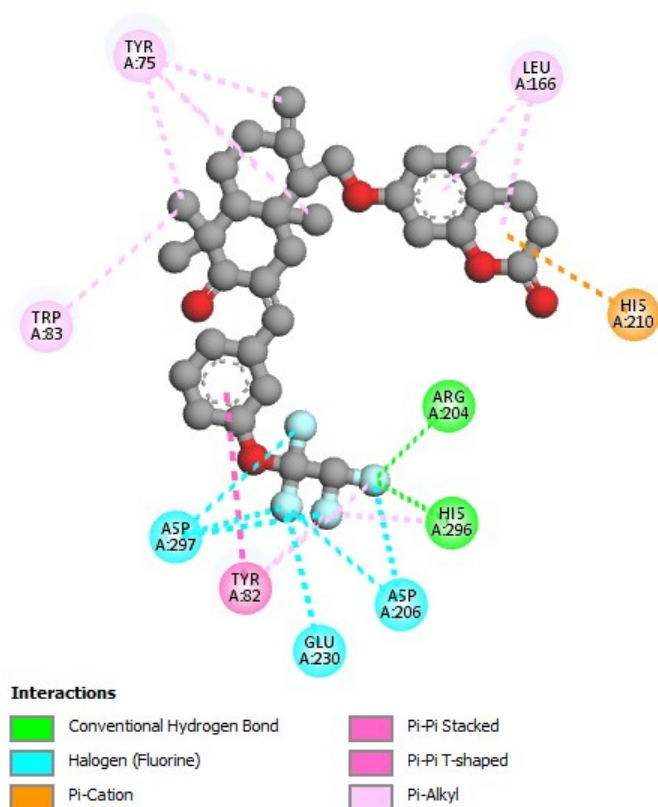

### 2D profile of compound 3k in the active site of $\alpha$ -amylase enzyme

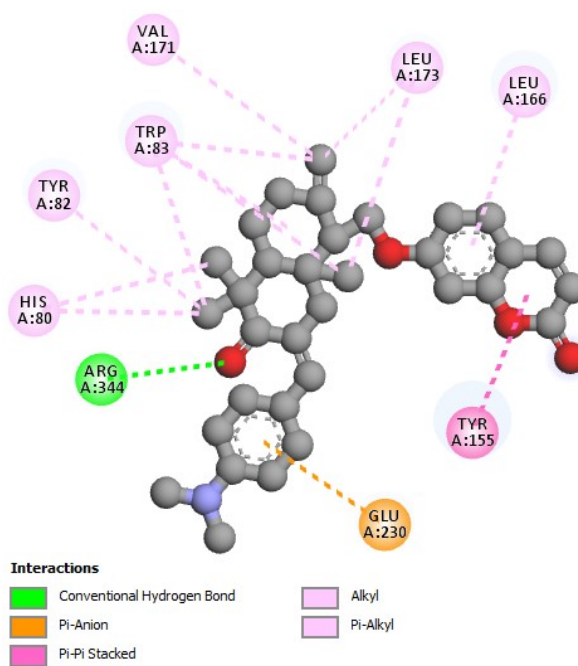

### 2D profile of compound 3l in the active site of $\alpha$ -amylase enzyme



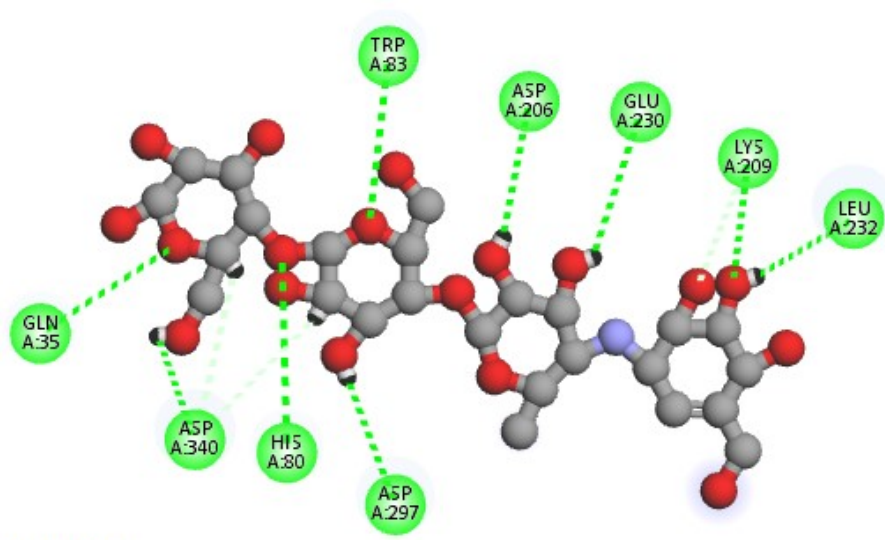

**Interactions**

- Conventional Hydrogen Bond
- Carbon Hydrogen Bond

**2D profile of acarbose in the active site of  $\alpha$ -amylase enzyme**

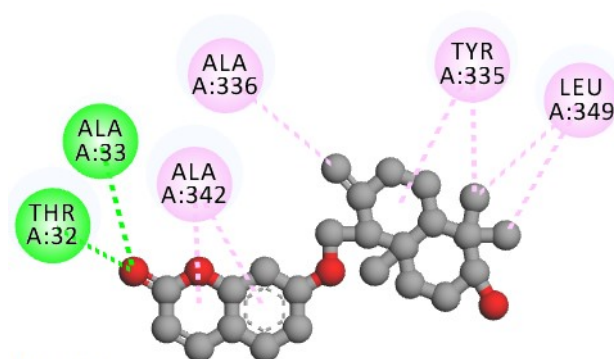

**Interactions**

- Conventional Hydrogen Bond
- Alkyl
- Pi-Alkyl

**2D profile of compound 1 in the allosteric site of  $\alpha$ -amylase enzyme**

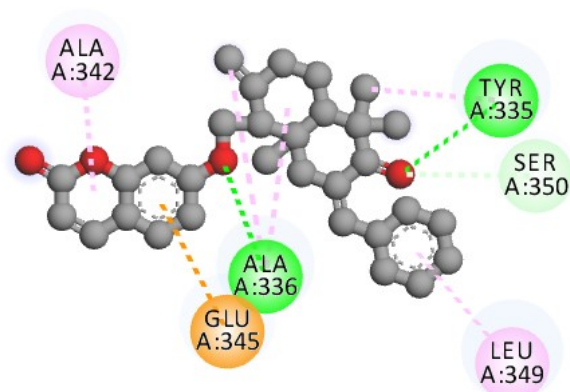

**Interactions**

- Conventional Hydrogen Bond
- Carbon Hydrogen Bond
- Pi-Anion
- Alkyl
- Pi-Alkyl

## 2D profile of compound 3a in the allosteric site of $\alpha$ -amylase enzyme

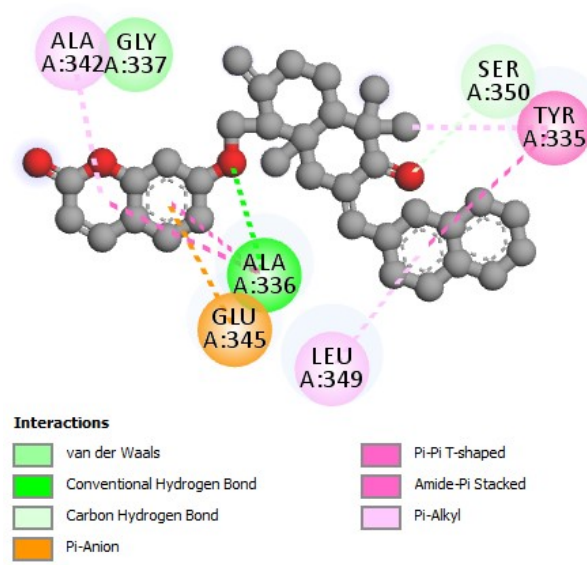

## 2D profile of compound 3b in the allosteric site of $\alpha$ -amylase enzyme

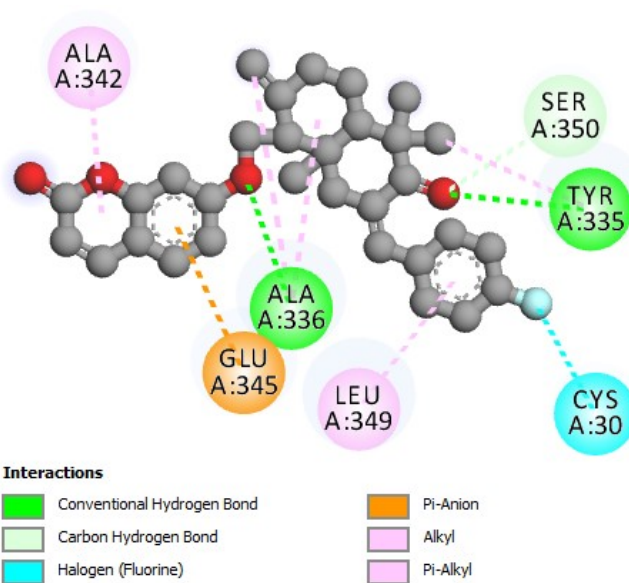

## 2D profile of compound 3c in the allosteric site of $\alpha$ -amylase enzyme

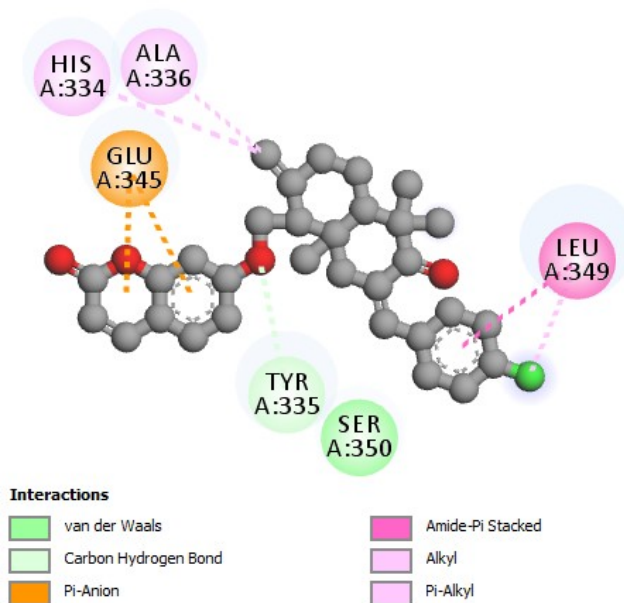

**2D profile of compound 3d in the allosteric site of  $\alpha$ -amylase enzyme**

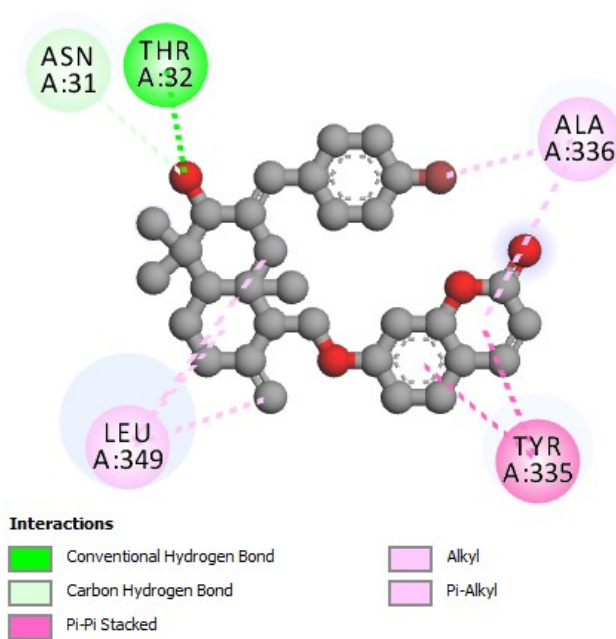

**2D profile of compound 3e in the allosteric site of  $\alpha$ -amylase enzyme**

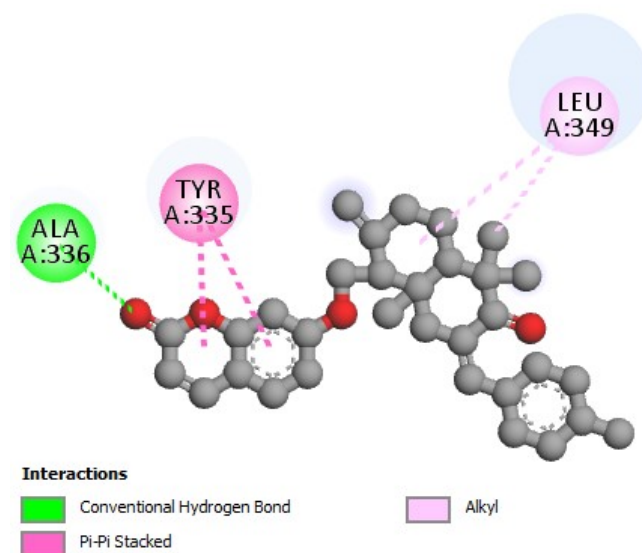

**2D profile of compound 3f in the allosteric site of  $\alpha$ -amylase enzyme**

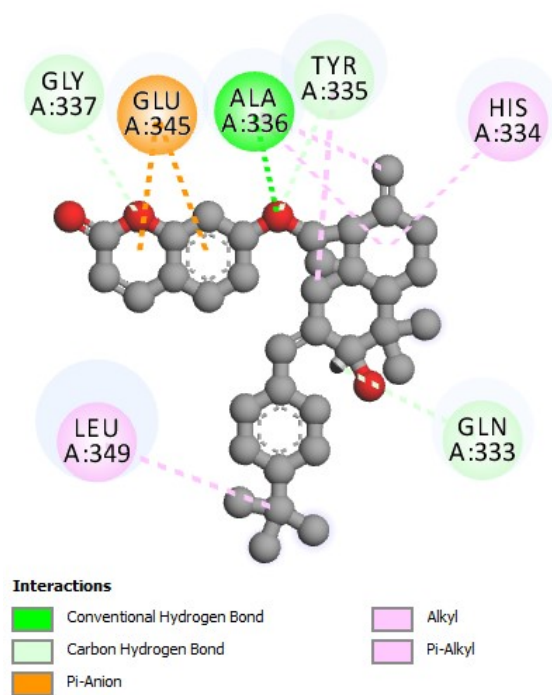

**2D profile of compound 3g in the allosteric site of  $\alpha$ -amylase enzyme**

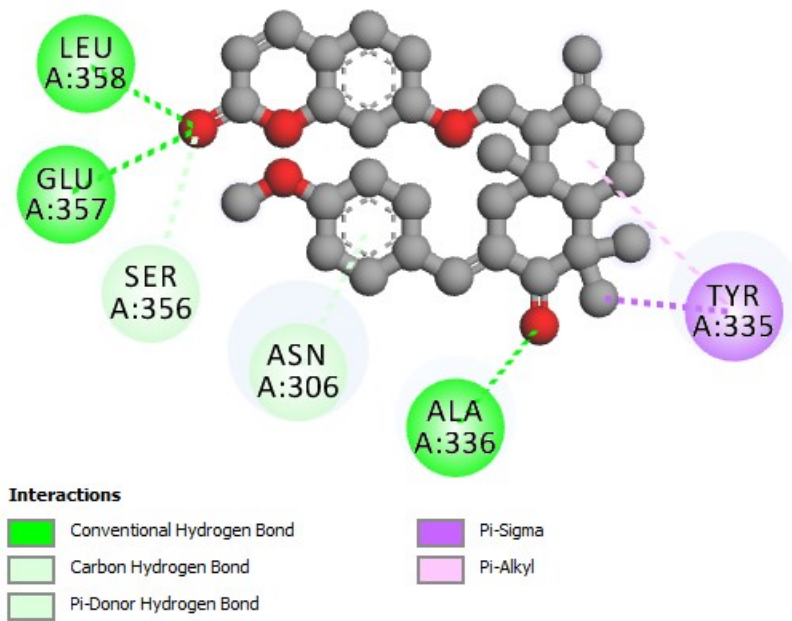

**2D profile of compound 3h in the allosteric site of  $\alpha$ -amylase enzyme**

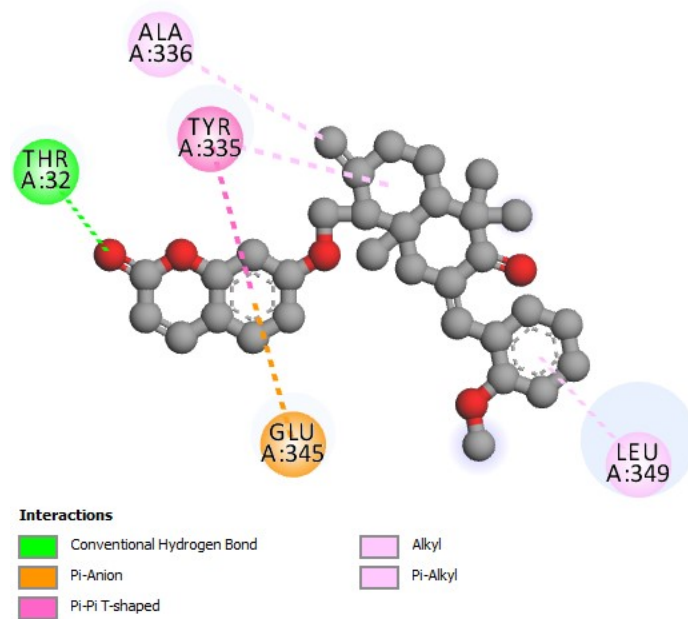

**2D profile of compound 3i in the allosteric site of  $\alpha$ -amylase enzyme**

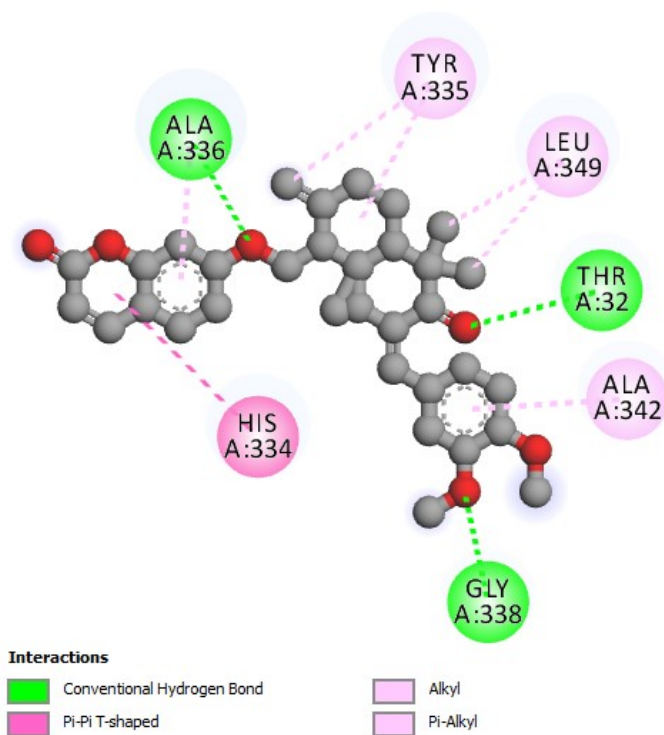

**2D profile of compound 3j in the allosteric site of  $\alpha$ -amylase enzyme**

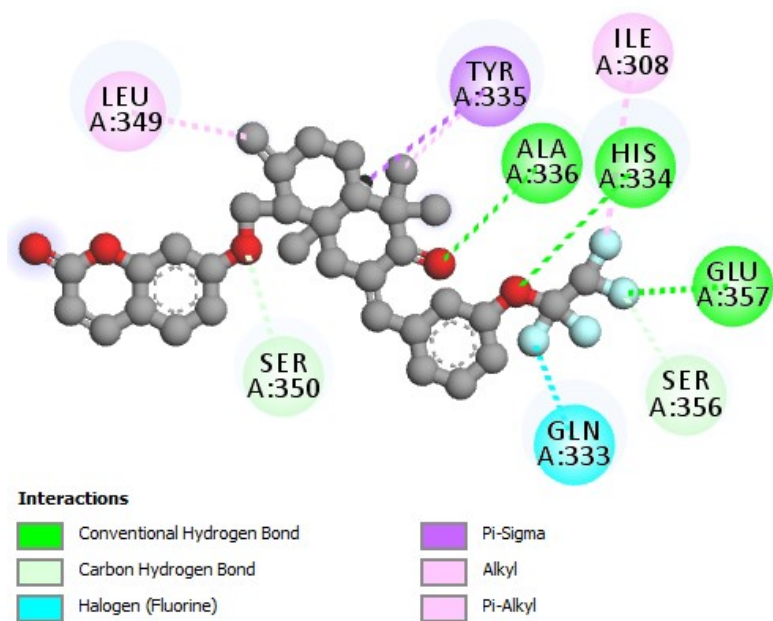

**2D profile of compound 3k in the allosteric site of  $\alpha$ -amylase enzyme**



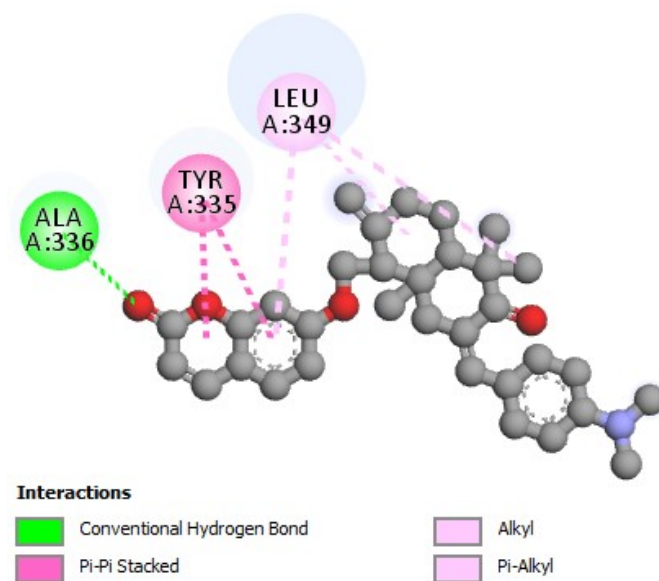

### 2D profile of compound 3l in the allosteric site of $\alpha$ -amylase enzyme

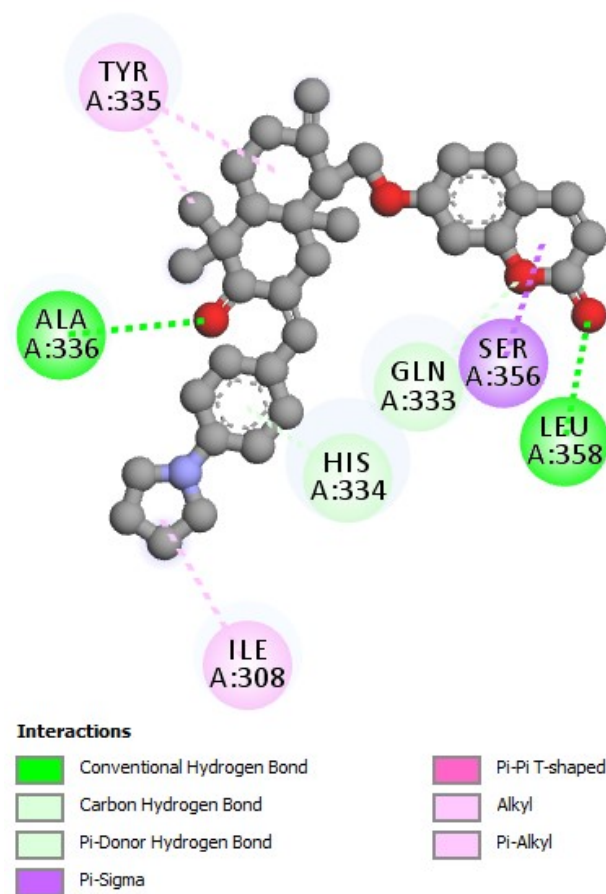

### 2D profile of compound 3m in the allosteric site of $\alpha$ -amylase enzyme

#### S4: Toxicity risk prediction for compounds 1 and 3a-m

| Compound | Mutagenicity | Tumorigenicity | Irritation | Reproductive effect |
|----------|--------------|----------------|------------|---------------------|
| 1        | ●            | ●              | ●          | ●                   |
| 3a       | ●            | ●              | ●          | ●                   |
| 3b       | ●            | ●              | ●          | ●                   |
| 3c       | ●            | ●              | ●          | ●                   |
| 3d       | ●            | ●              | ●          | ●                   |
| 3e       | ●            | ●              | ●          | ●                   |
| 3f       | ●            | ●              | ●          | ●                   |
| 3g       | ●            | ●              | ●          | ●                   |
| 3h       | ●            | ●              | ●          | ●                   |
| 3i       | ●            | ●              | ●          | ●                   |
| 3j       | ●            | ●              | ●          | ●                   |
| 3k       | ●            | ●              | ●          | ●                   |
| 3l       | ●            | ●              | ●          | ●                   |
| 3m       | ●            | ●              | ●          | ●                   |

- No risk
- Medium risk
- High risk

#### S5: Kinetic study of the three most active compounds

Kinetic study of 3K compound and determination of  $K_i$  and  $K_{mapp}$  (from LB-plot previously done)

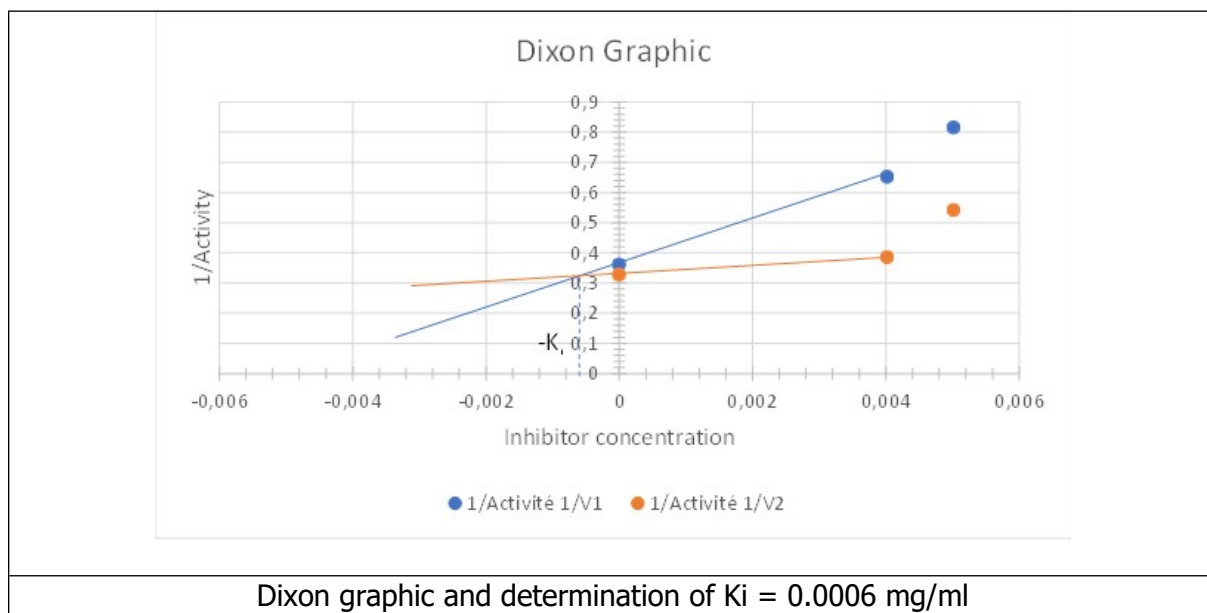



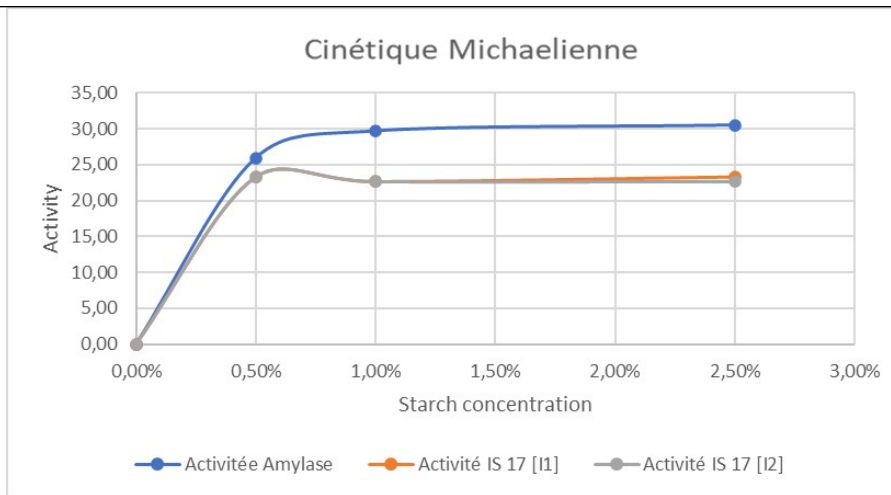

Graphical kinetic study section of 3K and  $K_{mapp} = 0.909 \text{ mg/ml}$

Kinetic study of 3I compound and determination of  $K_i$  and  $K_{mapp}$  (from LB-plot previously done)

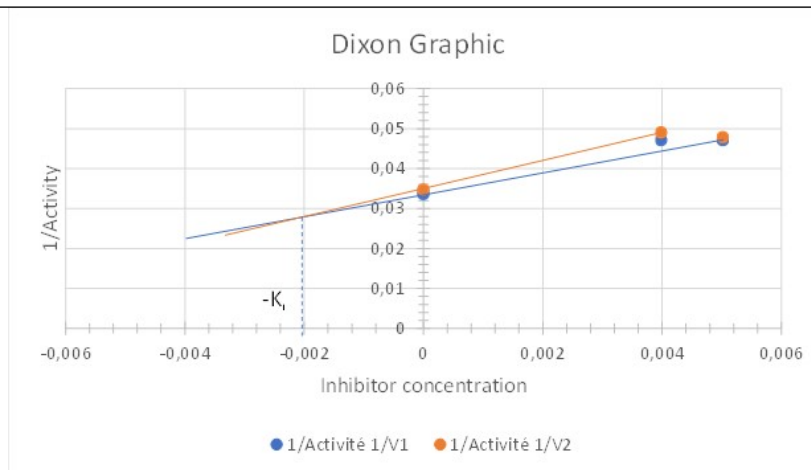

Dixon graphic and determination of  $K_i = 0.002 \text{ mg/ml}$

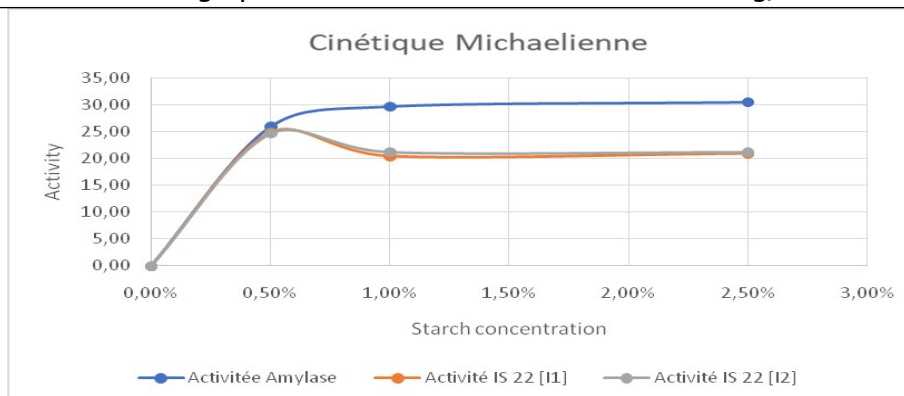

Graphical kinetic study section of 3I and  $K_{mapp} = 2 \text{ mg/ml}$

Kinetic study of 3K compound and determination of  $K_i$  and  $K_{mapp}$  (from LB-plot previously done)

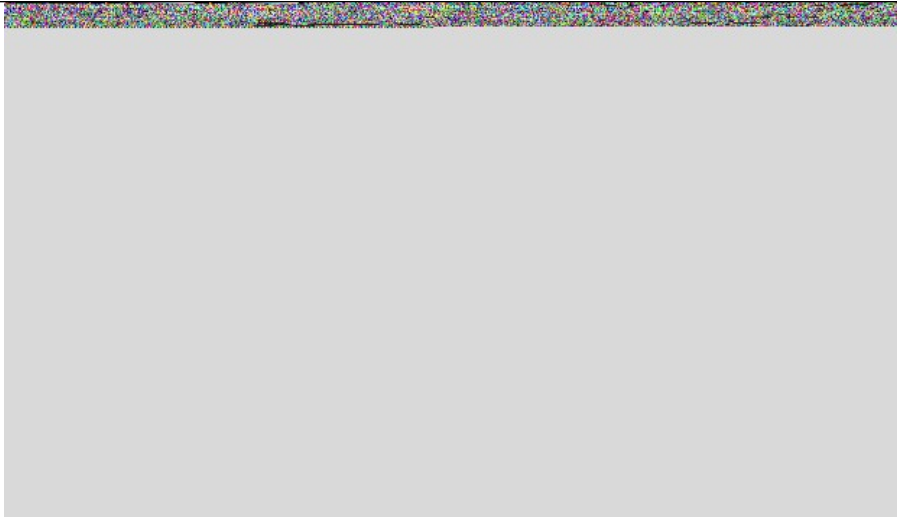

Dixon graphic and determination of  $K_i = 0.0006 \text{ mg/ml}$

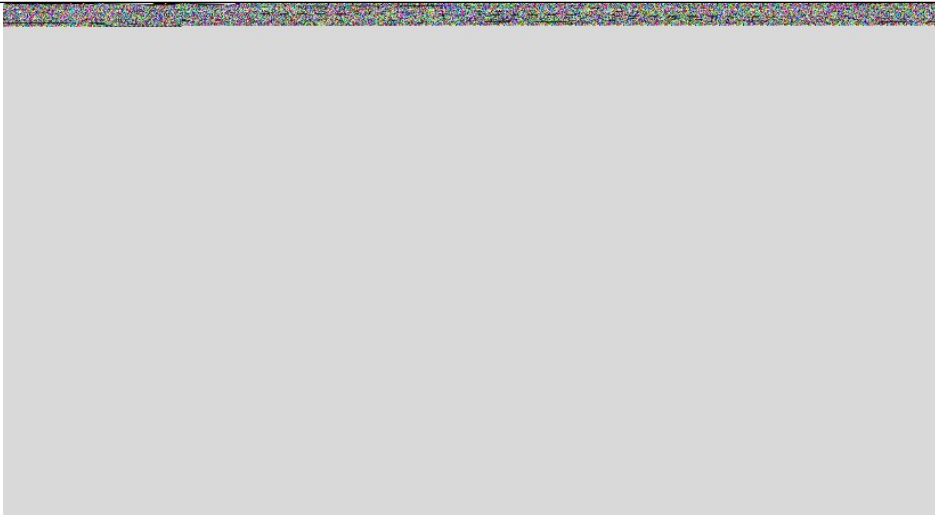

Graphical kinetic study section of  $3m$  and  $K_{mapp} = 0.909 \text{ mg/ml}$

S6: IC<sub>50</sub> graphs of all the tested compounds

| Compound | IC <sub>50</sub> (1)                                                                           | IC <sub>50</sub> (2)                                                                           | IC <sub>50</sub> (3)                                                                           | IC <sub>50</sub> ± SD |
|----------|------------------------------------------------------------------------------------------------|------------------------------------------------------------------------------------------------|------------------------------------------------------------------------------------------------|-----------------------|
| 1        | <p>IC<sub>50</sub>-1<br/> <math>y = 51,204x - 17,718</math><br/> <math>R^2 = 0,9585</math></p> | <p>IC<sub>50</sub>-2<br/> <math>y = 50,643x - 17,991</math><br/> <math>R^2 = 0,9799</math></p> | <p>IC<sub>50</sub>-3<br/> <math>y = 47,623x - 15,036</math><br/> <math>R^2 = 0,9791</math></p> | 22.08 ± 1.10          |
| 2        | <p>IC<sub>50</sub>-1<br/> <math>y = 46,188x - 14,731</math><br/> <math>R^2 = 0,9854</math></p> | <p>IC<sub>50</sub>-2<br/> <math>y = 50,689x - 19,929</math><br/> <math>R^2 = 0,971</math></p>  | <p>IC<sub>50</sub>-3<br/> <math>y = 47,783x - 17,555</math><br/> <math>R^2 = 0,9772</math></p> | 25.03 ± 0.99          |
| 3a       | <p>IC<sub>50</sub>-1<br/> <math>y = 48,563x - 21,042</math><br/> <math>R^2 = 0,9821</math></p> | <p>IC<sub>50</sub>-2<br/> <math>y = 47,995x - 19,685</math><br/> <math>R^2 = 0,9901</math></p> | <p>IC<sub>50</sub>-3<br/> <math>y = 45,192x - 16,488</math><br/> <math>R^2 = 0,9688</math></p> | 28.98 ± 0.65          |

3b

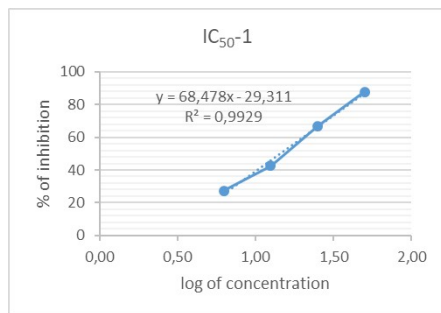

14.39

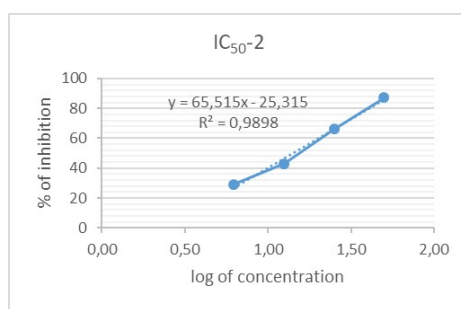

14.11

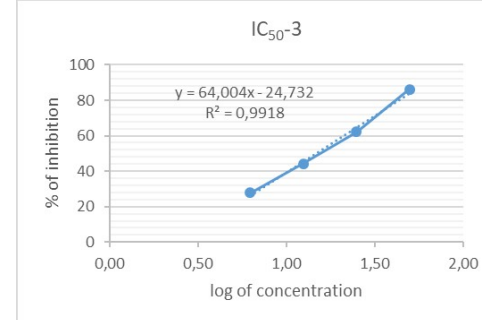

14.71

14.41 ± 0.30

3c

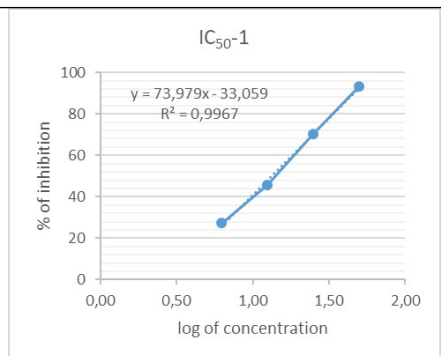

13.27

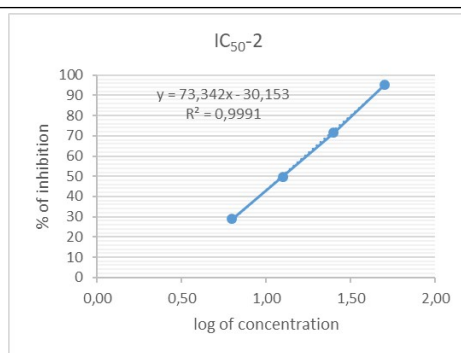

12.38

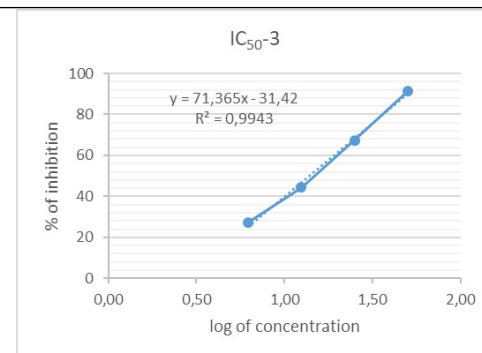

13.83

13.16 ± 0.73

3d

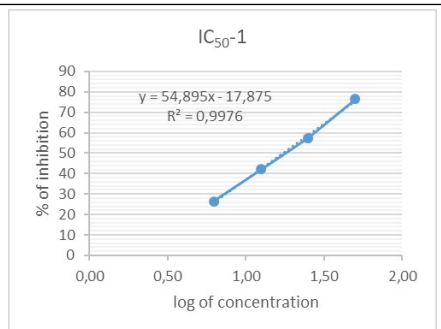

17.24

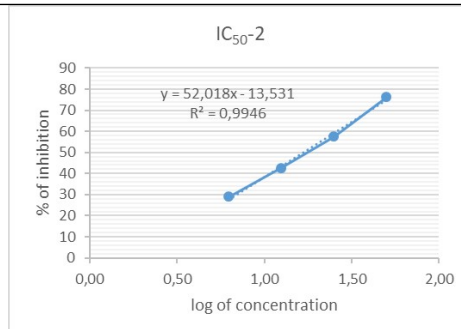

16.65

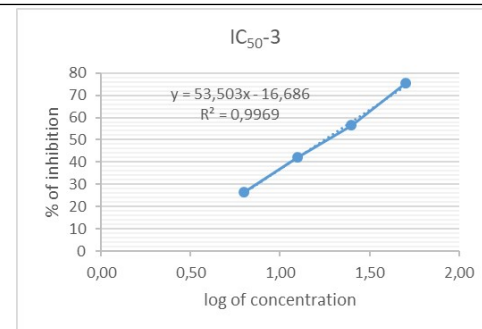

17.64

17.17 ± 0.50

3e

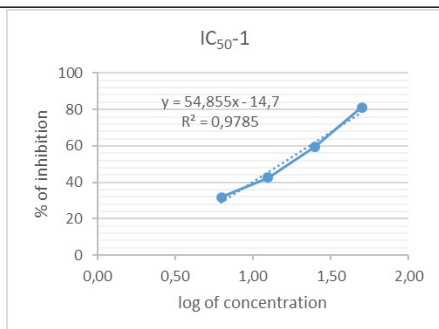

15.12

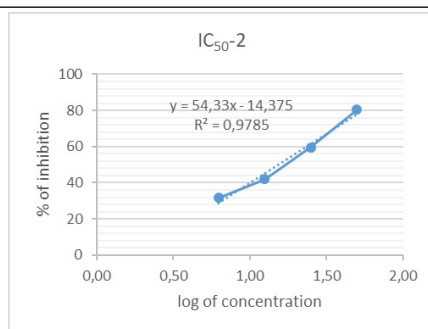

15.31

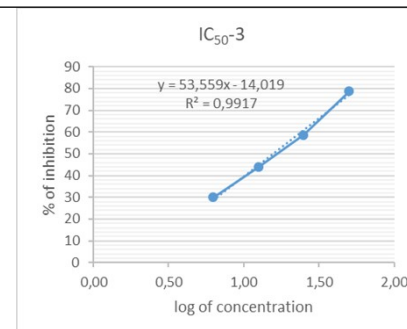

15.68

15.37 ± 0.29

3f

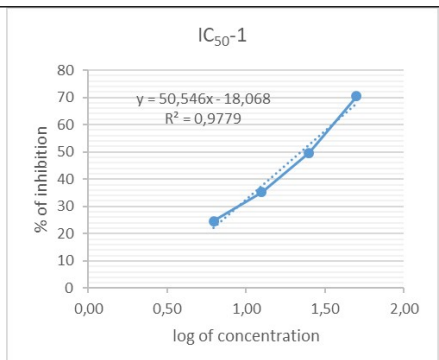

22.22

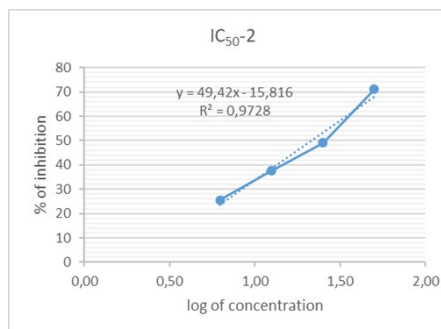

21.47

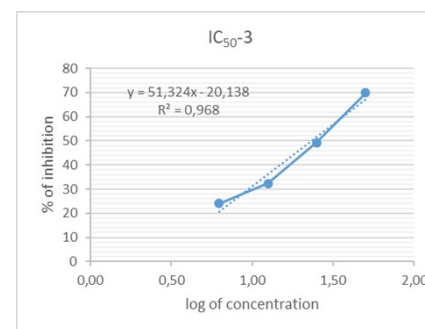

23.26

22.31 ± 0.90

3g

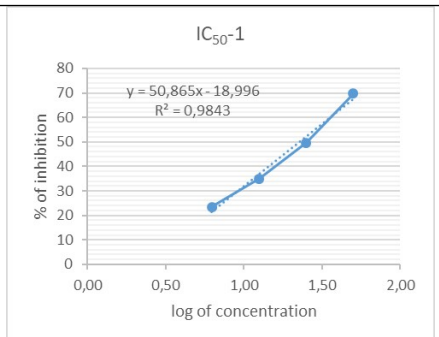

22.72

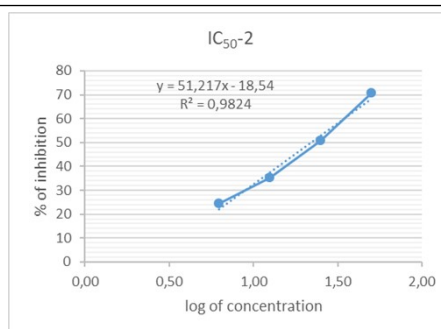

21.79

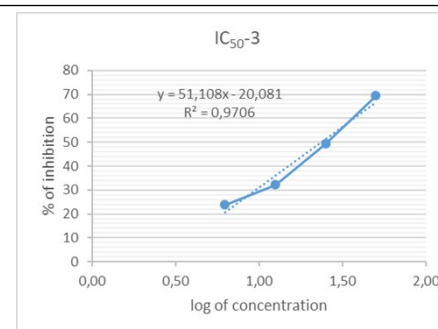

23.51

22.67 ± 0.86

3h

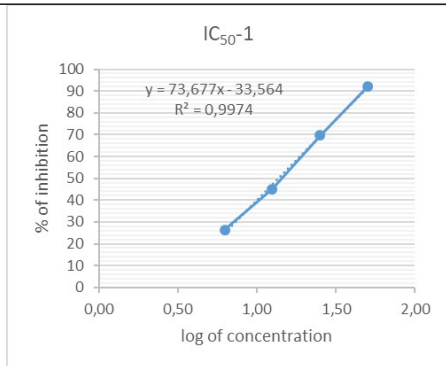

13.62

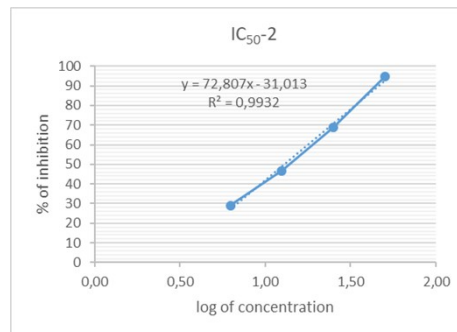

12.96

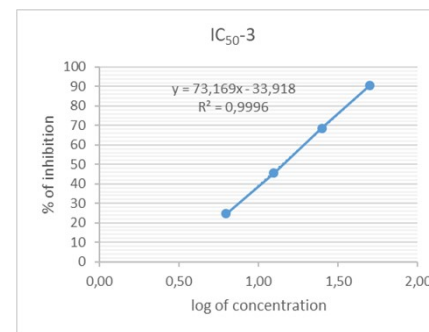

14.03

13.54 ± 0.54

3i

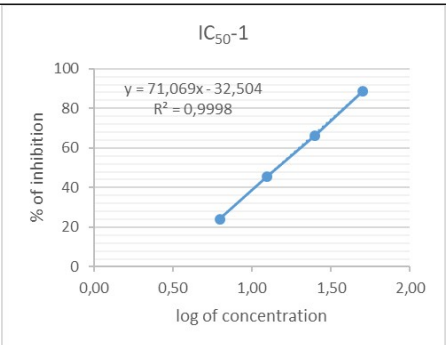

14.48

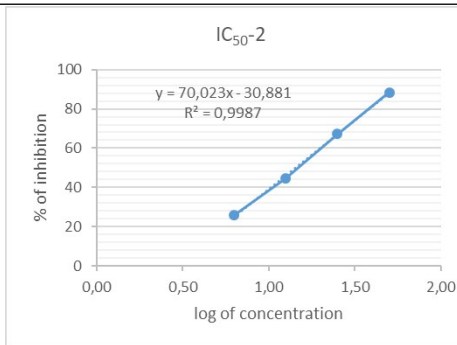

14.29

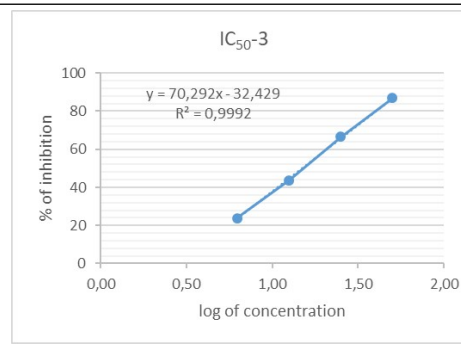

14.88

14.55 ± 0.30

3j

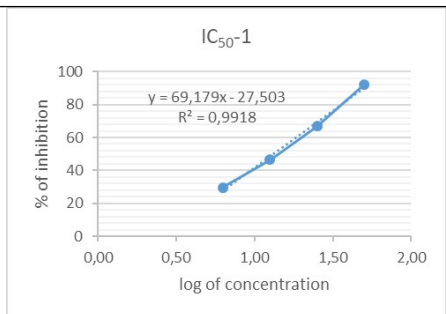

13.19

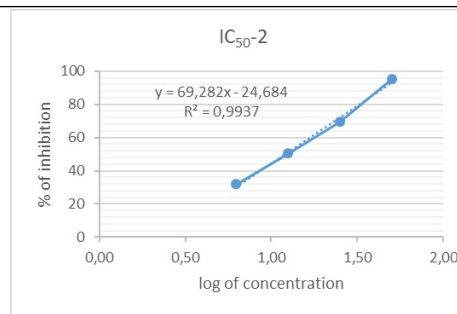

11.97

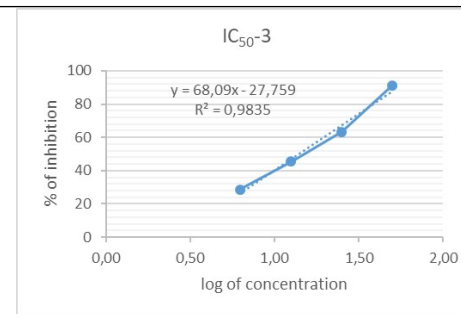

13.87

13.01 ± 0.96

3k

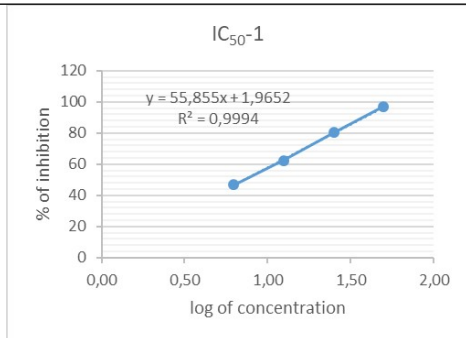

7.24

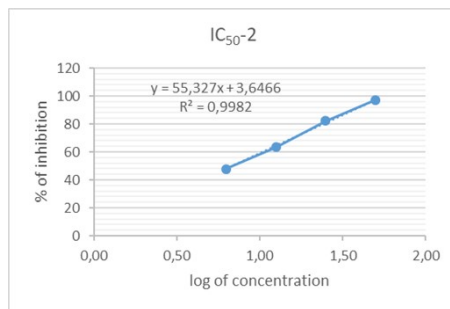

6.88

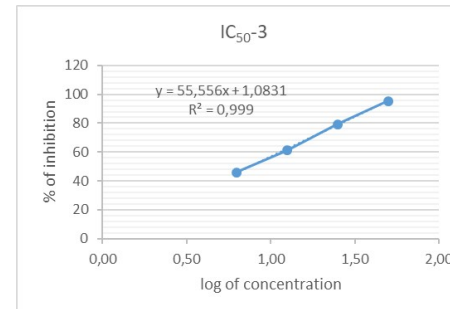

7.59

7.24 ± 0.36

3l

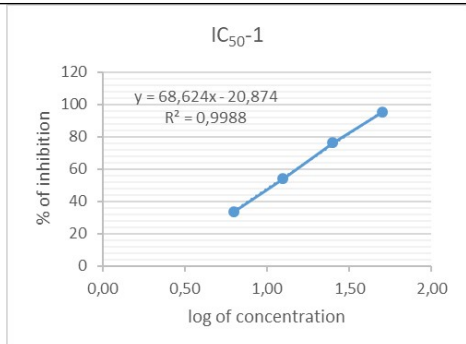

10.78

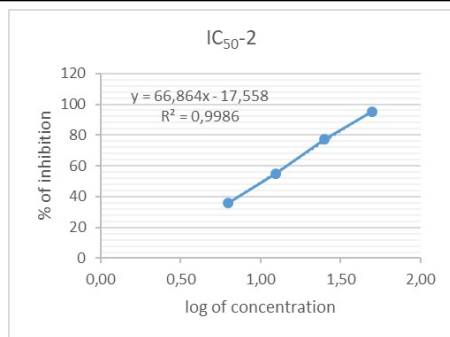

10.24

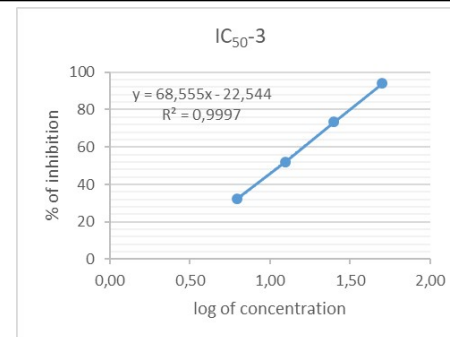

11.43

10.82 ± 0.60

3m

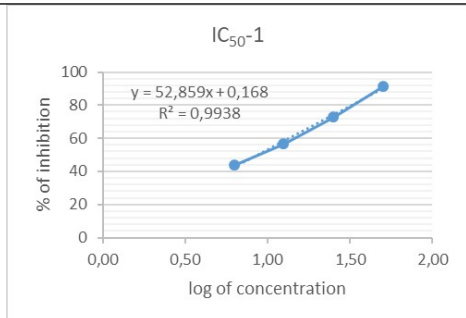

8.76

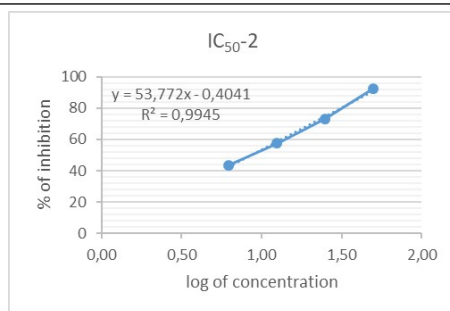

8.66

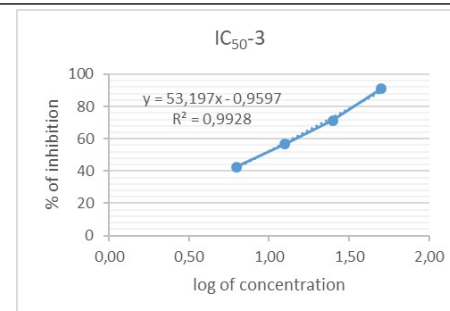

9.08

8.83 ± 0.22

Acarbose  
(Positive  
control)

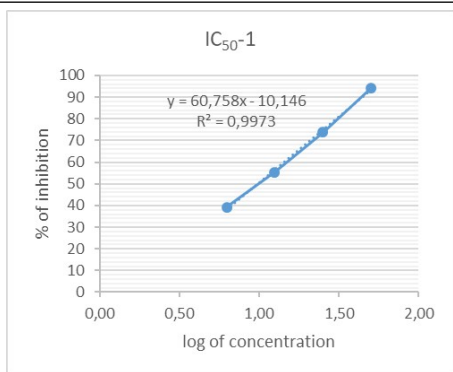

9.77

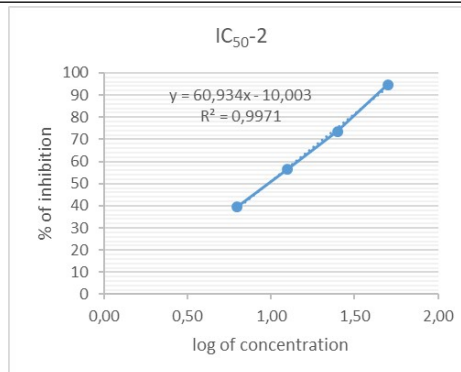

9.65

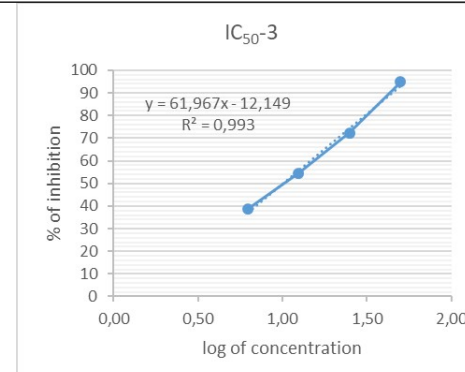

10.07

9.83 ± 0.21
